# Supplementary material for: Photoinduced radical cascade domino Heck coupling of N-aryl acrylamide with vinyl arenes enabled by palladium catalysis
Source: Royal Society of Chemistry journal article supplement (doi:10.1039/d3cc03506a), 2023-01-01

## Supplementary Information

# Photoinduced Radical Cascade Domino Heck Coupling of *N*-Aryl Acrylamide with Vinyl Arenes Enabled by Palladium Catalysis

Pei-shang Li<sup>a</sup>, Qiao-qiao Teng<sup>\*a</sup>, and Ming Chen<sup>\*a</sup>

<sup>1</sup>School of Petrochemical Engineering, Changzhou University, Changzhou 213164, China

<sup>a</sup>These authors contributed equally to this work.

\* = corresponding author. E-mail: [chenming0228@cczu.edu.cn](mailto:chenming0228@cczu.edu.cn)

|                                                                            |    |
|----------------------------------------------------------------------------|----|
| General Information .....                                                  | 2  |
| The Parameters of the Blue LEDs.....                                       | 3  |
| Syntheses of <i>N</i> -Aryl Acrylamide .....                               | 4  |
| Experimental Section .....                                                 | 6  |
| Procedure for the Preparation of <i>N</i> -Aryl Acrylamide 1g and 1h ..... | 6  |
| Reaction Optimization .....                                                | 8  |
| General Procedure of the Radical cascade Domino Heck Reaction.....         | 10 |
| Typical procedure for the synthesis of product 3.....                      | 10 |
| Grams Scale Synthesis .....                                                | 30 |
| Experimental Procedures for the Mechanistic Studies .....                  | 31 |
| The Radical Trapping Experiment with TEMPO .....                           | 31 |
| Control experiments:.....                                                  | 32 |
| UV-visible spectroscopy analysis.....                                      | 34 |
| Reference.....                                                             | 36 |
| NMR Spectra .....                                                          | 37 |

## General Information

Unless noted otherwise, all the solvents and commercially available reagents were purchased and used directly. Benzene, 1,4-dioxane and tetrahydrofuran were distilled freshly over sodium, benzotrifluoride was distilled freshly over P<sub>2</sub>O<sub>5</sub>, DCM was distilled freshly over CaH<sub>2</sub> and carefully freeze-pump-thawed. Sensitive reagents and solvents were transferred under nitrogen into a nitrogen-filled glovebox with standard techniques. Reactions were monitored with thin layer chromatography (TLC) using silica gel 60 F-254 plates. TLC plates were normally visualized by UV irradiation (254 nm or 365 nm), stained with basic KMnO<sub>4</sub>. Flash chromatography was performed using silica gel 60 (200–300 mesh). Vials (15 x 45 mm 1 dram (4 mL) / 17 x 60 mm 3 dram (7.5 mL) with PTFE lined cap attached) were purchased from Qorpak and flame-dried or put in an oven overnight and cooled in a desiccator. Mass (HRMS) analysis was obtained using Agilent 6200 Accurate-Mass TOF LC/MS system with Electrospray Ionization (ESI). UV-visible spectroscopy analysis was conducted using METASH X-8S. Nuclear magnetic resonance spectra (<sup>1</sup>H NMR and <sup>13</sup>C NMR) were recorded with Bruker AVANCE III-400 (400 MHz, <sup>1</sup>H at 400 MHz, <sup>13</sup>C at 101 MHz). <sup>19</sup>F NMR spectra were recorded on Bruker AVANCE III-400. Unless otherwise noted, all spectra were acquired in CDCl<sub>3</sub>. Chemical shifts are reported in parts per million (ppm, δ), downfield from tetramethylsilane (TMS, δ = 0.00 ppm) and are referenced to residual solvent (CDCl<sub>3</sub>, δ = 7.26 ppm (<sup>1</sup>H) and 77.00 ppm (<sup>13</sup>C)). Coupling constants were reported in Hertz (Hz). Data for <sup>1</sup>H NMR spectra were reported as follows: chemical shift (ppm, referenced to protium, s = singlet, d = doublet, t = triplet, q = quartet, quin = quintet, dd = doublet of doublets, td = triplet of doublets, ddd = doublet of doublet of doublets, m = multiplet, coupling constant (Hz), and integration). All other materials were obtained from Energy Chemical and were used as received.

# The Parameters of the Blue LEDs

## Test Report of LED Photoelectric Test System

|                                                         |                                              |                               |
|---------------------------------------------------------|----------------------------------------------|-------------------------------|
| Test project:                                           | LED spectral analysis                        |                               |
| Test equipment:                                         | Photochromic-electric integrated test system |                               |
| The test identification                                 | Product model: 3 W Blue LED                  |                               |
|                                                         | Ambient temperature: 27 °C                   | Ambient humidity: 65%         |
|                                                         | Test organization: spectrotest department    |                               |
| Spectral relative energy distribution curve             |                                              |                               |
| <p style="text-align: center;"><b>Wavelength/nm</b></p> |                                              |                               |
| Spectrum parameter                                      |                                              | Photoelectric parameter       |
| peak wavelength:                                        | 453.6 nm                                     | lighting current: 3.0 mA      |
| main wavelength:                                        | 460.2 nm                                     | preheating time: 500 ms       |
| centroid wavelength:                                    | 445.7 nm                                     | test current: 700.0 mA        |
| central wavelength:                                     | 446.0 nm                                     | direct voltage: 3.52 V        |
| half-wave width:                                        | 22.0 nm                                      | light flow: 40547.6 mlm       |
| colour temperature:                                     | K                                            | light efficiency: 16.456 lm/w |
| chromaticity coordinate (x, y):                         | 0.1467, 0.0349                               | optical power: 896.0946 mv    |
| chromaticity coordinate (u, v):                         | 0.1877, 0.0670                               | backward voltage: 5.00 V      |
| CRI (color rendering index):                            | 0                                            | leakage current: 0.0 μA       |
| colour purity:                                          | 0.984                                        |                               |
| Note:Guanghong 45, 460                                  |                                              |                               |
| -462                                                    |                                              |                               |

# Syntheses of *N*-Aryl Acrylamide

The amides were prepared according to the previously reported literature. The **1a~f<sup>1</sup>**, **1j<sup>1</sup>**, **5-7<sup>1</sup>**, are known compounds, **1m**, **1n** are unknown compounds.

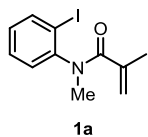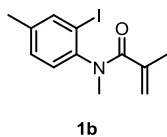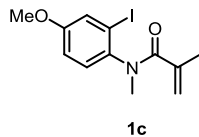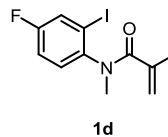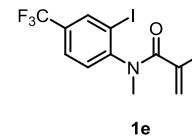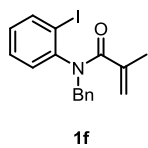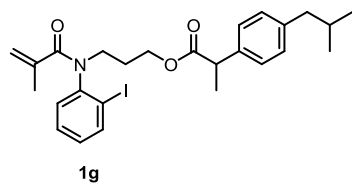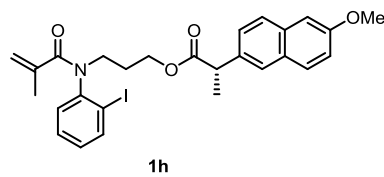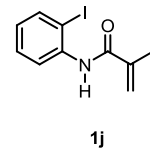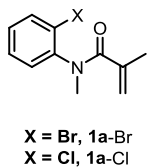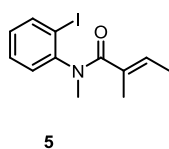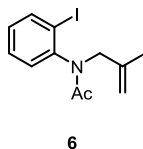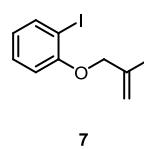



The styrene **2f**<sup>2</sup>, **2g**<sup>3</sup>, **2h**<sup>4</sup>, **2i**<sup>5</sup>, **2n**<sup>6</sup>, and **2t**<sup>7</sup>, were prepared according to the previously reported literature. The others are commercially available and were used as received.

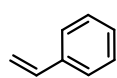

**2a**

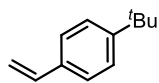

**2b**

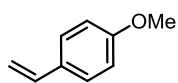

**2c**

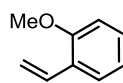

**2d**

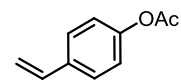

**2e**

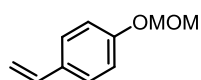

**2f**

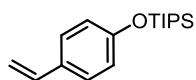

**2g**

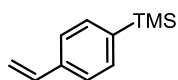

**2h**

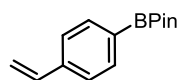

**2i**

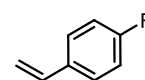

**2j**

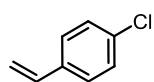

**2k**

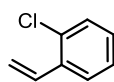

**2l**

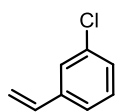

**2m**

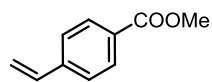

**2n**

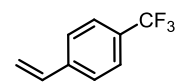

**2o**

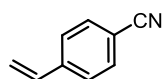

**2p**

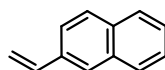

**2q**

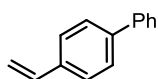

**2r**

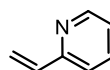

**2s**

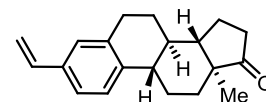

**2t**

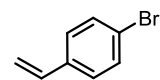

**2u**

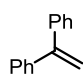

**2v**

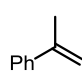

**2w**

## Experimental Section

### Procedure for the Preparation of *N*-Aryl Acrylamide **1g** and **1h**

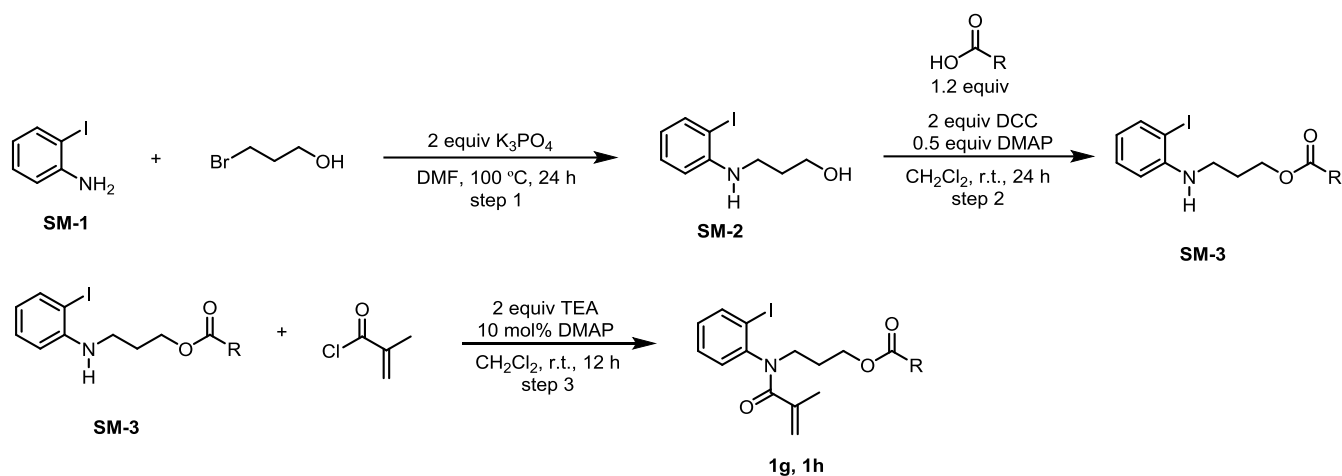

Step 1: To a solution of the **SM-1** (1.1 g, 5.0 mmol, 1.0 equiv.) in DMF (1.67 M) under atmosphere was added  $K_3PO_4$  (2.1 g, 10 mmol, 2 equiv), 3-bromopropan-1-ol (1.4 g, 10 mmol, 2 equiv). After stirring for 24 h at 100 °C in a sealed tube, after removal of the solvent, the resulting residue was added saturated  $H_2O$  and EtOAc stirred for 30 minutes. Then, the layers were separated. Purification by column chromatography on silica gel eluting with petroleum ether: ethyl acetate = 10:1 gave **SM-2** in 45% isolated yield (602 mg).

Step 2: To a solution of **SM-2** in anhydrous  $CH_2Cl_2$  (0.2 M) at room temperature, under air was added Ibuprofen (743 mg, 3.6 mmol, 1.2 equiv). After stirring for 24 h at room temperature in a sealed tube, after removal of the solvent. Then the resulting **SM-3** used directly for the next step without further purification.

Step 3: To a solution of **SM-3** in anhydrous  $CH_2Cl_2$  (0.3 M) and TEA (607 mg, 6 mmol, 2 equiv) at room temperature, methacryloyl chloride (376 mg, 3.6 mmol, 1.2 equiv.) was added dropwise over 30 minutes. The reaction was vigorously stirred at room temperature for 20 hours. The solvent was removed in vacuum. The resulting residue was added saturated  $H_2O$  and  $CH_2Cl_2$  stirred for 30 minutes. Then, the layers were separated. Purification by column chromatography on silica gel eluting with petroleum ether: ethyl acetate = 5:1 gave **1g** in 74% isolated yield (1.2 g).

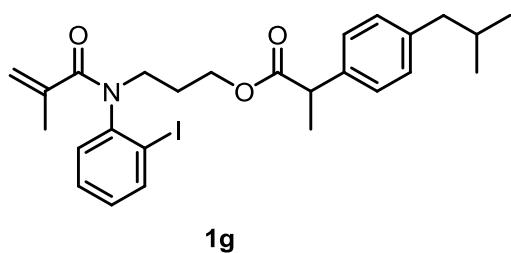

**3-(*N*-(2-iodophenyl)methacrylamido)propyl 2-(4-isobutylphenyl)propanoate (1g).** Isolated yield = 74% on 3 mmol scale; colourless oil;  $R_f = 0.5$  (Hexane: Ethyl acetate = 5:1).  $^1\text{H NMR}$  (400 MHz,  $\text{CDCl}_3$ )  $\delta$  7.89 (dt,  $J = 8.0, 1.6$  Hz, 1H), 7.35 – 7.31 (m, 1H), 7.35– 7.31 (m, 3H), 7.07 – 6.99 (m, 3H), 4.99 (d,  $J = 18.4$  Hz, 2H), 4.21 – 4.06 (m, 3H), 3.65 (p,  $J = 7.2$  Hz, 1H), 3.23 (m, 1H), 2.43 (d, 2H), 2.04 – 1.78 (m, 6H), 1.45 (d,  $J = 7.2$  Hz, 3H), 0.89 (d,  $J = 6.8$  Hz, 6H).  $^{13}\text{C NMR}$  (101 MHz,  $\text{CDCl}_3$ )  $\delta$  174.6, 171.5, 145.0, 140.4, 140.2, 137.6, 130.6, 129.3, 129.3, 129.1, 127.2, 127.1, 118.9, 100.0, 62.5, 62.4, 46.2, 46.1, 45.1, 30.2, 26.6, 22.5, 20.6, 18.5. **HRMS (ESI)** calcd for  $\text{C}_{26}\text{H}_{33}\text{INO}_3$   $[\text{M}+\text{H}]^+$ : 534.1500, found 534.1498.

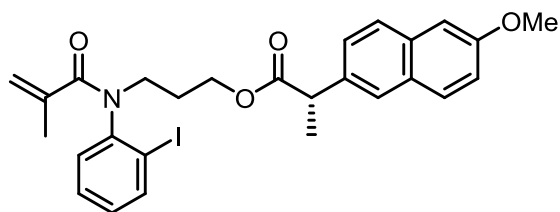

**1h**

**3-(*N*-(2-iodophenyl)methacrylamido)propyl (*S*)-2-(6-methoxynaphthalen-2-yl)propanoate (1h).** Isolated yield = 89% on 1.1 mmol scale; colourless oil;  $R_f = 0.5$  (Hexane: Ethyl acetate = 5:1).  $^1\text{H NMR}$  (400 MHz,  $\text{CDCl}_3$ )  $\delta$  7.84 – 7.79 (m, 1H), 7.69 – 7.62 (m, 3H), 7.35 (ddd,  $J = 8.4, 3.2, 2.0$  Hz, 1H), 7.26 (s, 2H), 7.14 – 7.09 (m, 2H), 7.04 (td,  $J = 8.0, 1.6$  Hz, 1H), 4.96 (d,  $J = 12.4$  Hz, 2H), 4.13 (p,  $J = 7.6, 6.8$  Hz, 3H), 3.91 (d,  $J = 0.8$  Hz, 3H), 3.81 (t,  $J = 7.2$  Hz, 1H), 3.19 – 3.17 (m, 1H), 1.96– 1.80 (m, 5H), 1.54 (d,  $J = 7.2$  Hz, 3H).  $^{13}\text{C NMR}$  (101 MHz,  $\text{CDCl}_3$ )  $\delta$  174.6, 171.5, 157.6, 145.0, 140.3, 140.2, 135.6, 133.7, 130.5, 129.4, 129.3, 129.0, 128.9, 127.2, 127.2, 126.2, 125.9, 118.9, 105.6, 99.9, 62.5, 55.4, 46.2, 45.4, 26.6, 20.6, 18.5. **HRMS (ESI)** calcd for  $\text{C}_{27}\text{H}_{32}\text{IN}_2\text{O}_4$   $[\text{M}+\text{NH}_4]^+$ : 575.1401. found 575.1404.

# Reaction Optimization

Table S1. Optimization for the Radical Cascade Domino Heck Coupling Reaction

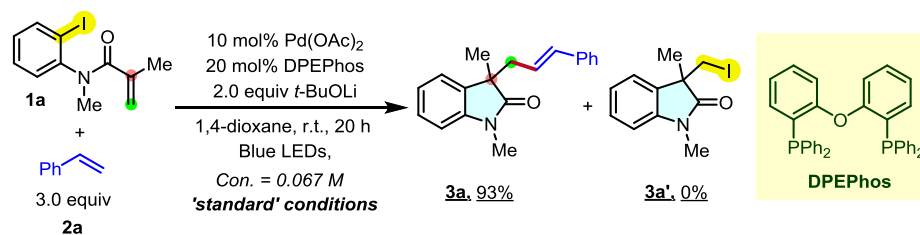

| Entry | Variations from the 'standard' conditions         | Yield (%) of <b>3a/3a'</b> <sup>[a]</sup> |
|-------|---------------------------------------------------|-------------------------------------------|
| 1     | Without <b>Pd(OAc)<sub>2</sub> (C1)</b>           | 0/0                                       |
| 2     | Without <b>Blue LEDs</b>                          | 0/0                                       |
| 3     | Without <b>t-BuOLi (B1)</b>                       | 19/33                                     |
| 4     | Without <b>DPEPhos (L1)</b>                       | 0/31                                      |
| 5     | <b>C2-5</b> instead of <b>Pd(OAc)<sub>2</sub></b> | Listed below                              |
| 6     | <b>L2-8</b> instead of <b>DPEPhos</b>             | Listed below                              |
| 7     | <b>B2-9</b> instead of <b>t-BuOLi</b>             | Listed below                              |
| 8     | carried out in air                                | 30/65                                     |
| 9     | Without <b>Blue LEDs</b> , carried out in 80 °C   | 0/0                                       |
| 10    | solvent = THF                                     | 74/0                                      |
| 11    | solvent = PhH                                     | 59/34                                     |
| 12    | solvent = Ph-F                                    | 60/27                                     |
| 13    | solvent = DMSO                                    | 0/0                                       |

  

|                   |                   |                   |                     |
|-------------------|-------------------|-------------------|---------------------|
| <b>C2</b> , 75/0  | <b>C3</b> , 89/0  | <b>C4</b> , 91/0  | <b>C5</b> , 92/0    |
|                   |                   |                   |                     |
| <b>L2</b> , 16/62 | <b>L3</b> , 89/0  | <b>L4</b> , 28/31 | <b>L5</b> , 0/0     |
|                   |                   |                   |                     |
| <b>L6</b> , 0/0   | <b>L7</b> , 6/32  | <b>L8</b> , 0/0   | <b>L9</b> , 0/0     |
|                   |                   |                   |                     |
| <b>B2</b> , 31/64 | <b>B3</b> , 62/30 | <b>B4</b> , 23/50 | <b>B5</b> , 63/0    |
| <b>B6</b> , 25/45 | <b>B7</b> , 58/0  | <b>B8</b> , 0/0   | <b>B9</b> , 71/26   |
| <b>B2</b> , 31/64 | <b>B3</b> , 62/30 | <b>B4</b> , 23/50 | <b>B5</b> , 63/0    |
| NaOAc             | <i>t</i> -BuONa   | <i>t</i> -BuOK    | Cy <sub>2</sub> NMe |
| <b>B6</b> , 25/45 | <b>B7</b> , 58/0  | <b>B8</b> , 0/0   | <b>B9</b> , 71/26   |

<sup>a</sup>Each reaction was run on a 0.1 mmol scale in a sealed 4 mL vial for 20 h; <sup>b</sup>Yields of **3a** and **3a'** were determined by <sup>1</sup>H NMR using CH<sub>2</sub>Br<sub>2</sub> as the internal standard. Cy = cyclohexane, dba = dibenzylideneacetone, TFA = trifluoroacetate.

Our investigations began with the reaction of *N*-(2-iodophenyl)-acrylamide **1a** and styrene **2a** as the model substrates. Through extensive optimization, the desired domino Heck product **3a** was successfully obtained in a yield of 93% with complete (*E*)-selectivity. Notably, no carboiodination byproduct **3a'** was observed. The reaction conditions involved the use of Pd(OAc)<sub>2</sub>, DPEPhos as the metal/ligand combination, and <sup>t</sup>BuOLi as the base in 1,4-dioxane under blue LED irradiation. The necessity of each reactant was investigated through control experiments. It was evident that both the palladium catalyst and blue light were essential for the desired transformation (entries 1-2). Without the base, the reaction yielded **3a** in 19% yield, accompanied by a 33% yield of the carboiodination side product **3a'** (entry 3). In the absence of DPEPhos, carboiodination of the olefin became the dominant pathway, resulting in a 31% yield of **3a'** (entry 4). Additionally, various other Pd(0) and Pd(II) complexes also showed high efficiencies (entry 5). Subsequently, a series of ligands were examined (entry 6). Xantphos (**L3**) yielding comparable results, the use of *rac*-BINAP and *N*-XantPhos (**L2** and **L4**) exhibited lower efficiency. Other mono- or bidentate P/N ligands (**L5-L9**) gave sluggish results. Investigation of different bases (entry 7) revealed the crucial role of <sup>t</sup>BuOLi in controlling chemoselectivity. Cs<sub>2</sub>CO<sub>3</sub> and <sup>t</sup>BuONa provided moderate yields of a single domino Heck product **3a**, while other inorganic bases such as K<sub>2</sub>CO<sub>3</sub>, K<sub>3</sub>PO<sub>4</sub>, NaHCO<sub>3</sub>, NaOAc, and organic base Cy<sub>2</sub>NMe resulted in significant formation of undesired carboiodination byproducts **3a'**. KO<sup>t</sup>Bu completely inhibited the reaction. When the reaction was conducted in ambient air, the desired product **3a** was obtained in low yield, accompanied by the formation of **3a'** with a 65% yield. This indicates that the presence of oxygen reduces the efficiency of the radical domino Heck coupling (entry 8). Notably, under the heating conditions, the reaction was shut down (entry 9). A survey of various solvents revealed that 1,4-dioxane was the optimal choice. Polar solvents such as THF also yielded the desired product in good yield. However, nonpolar solvents like PhH and PhF gave moderate yields with a significant amount of carboiodination byproduct. DMSO did not show any reactivity in this reaction (entries 10-13).

# General Procedure of the Radical cascade Domino Heck Reaction

## Typical procedure for the synthesis of product 3

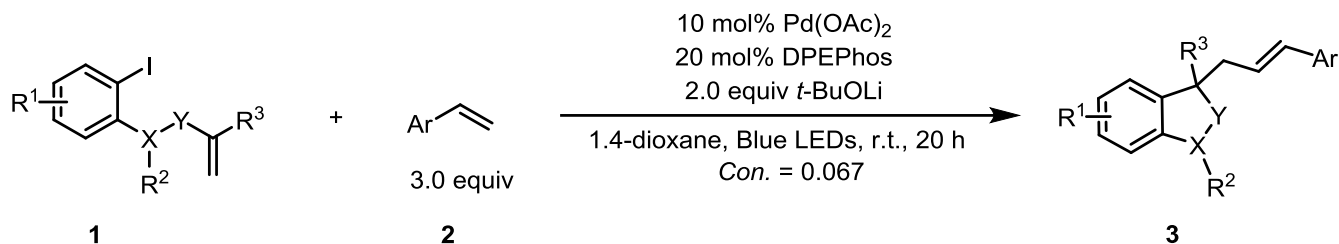

An oven-dried 4.0 mL vial was charged with amide **1** (0.2 mmol, 1.0 equiv.), alkene **2** (0.6 mmol, 3.0 equiv.), Pd(OAc)<sub>2</sub> (4.5 mg, 0.02 mmol, 10 mol%), DPEPhos (21.5 mg, 0.04 mmol, 20%) and *t*-BuOLi (32.0 mg, 0.4 mmol, 2.0 equiv.). It was directly transferred in a nitrogen-filled glovebox with caps. In the glovebox, 3 mL of degassed 1,4-dioxane were added to the vial. The vial was tightly sealed, transferred out of glovebox and stirred at room temperature under the irradiation of blue LEDs lamps for 20 hours. After completion of the reaction, the resulting mixture was diluted with acetone (5 mL), filtered (Celite), and concentrated under a reduced pressure. The residue was purified by column chromatography on silica gel (EtOAc/Petroleum ether = 1:10 to 1:5) to afford **3**.

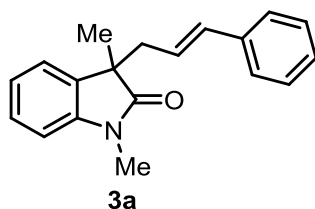

**3-Cinnamyl-1,3-dimethylindolin-2-one (3a).** Following the typical procedure described above, the reaction was carried out by the mixture of **1a** (60.2 mg, 0.2 mmol, 1.0 equiv), styrene (62.5 mg, 0.6 mmol, 3.0 equiv), Pd(OAc)<sub>2</sub> (4.5mg, 0.02 mmol, 10 mol%), DPEPhos (21.5 mg, 0.04 mmol, 20 mol%) and *t*-BuOLi (32.0 mg, 0.4 mmol, 2.0 equiv) in 1,4-dioxane (3.0 mL) at room temperature in nitrogen atmosphere under the irradiation of blue LED lamps for 20 hours. Column chromatography on silica gel (EtOAc/Petroleum ether = 1:10) afforded the title product in 93% isolated yield (48.7 mg) and *E* only as a colorless oil; *R<sub>f</sub>* = 0.5 (Hexane: Ethyl acetate = 10:1). <sup>1</sup>H NMR (400 MHz, CDCl<sub>3</sub>) δ 7.29 – 7.17 (m, 7H), 7.07 (td, *J* = 7.6, 1.2 Hz, 1H), 6.82 (d, *J* = 7.6 Hz, 1H), 6.34 (d, *J* = 15.6 Hz, 1H), 5.88 (ddd, *J* = 15.6, 8.0, 7.2 Hz, 1H), 3.18 (s, 3H), 2.70 – 2.60 (m, 2H), 1.42 (s, 3H). <sup>13</sup>C NMR (101 MHz, CDCl<sub>3</sub>) δ 180.2, 143.1, 137.2, 133.6, 133.5, 128.4, 127.8, 127.1, 126.1, 124.2, 122.9, 122.4, 108.0, 48.6, 41.6, 26.1, 22.5. The spectroscopic data match the reported literature<sup>8</sup>.

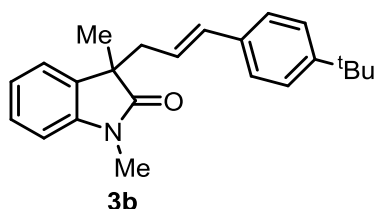

**(E)-3-(3-(4-(tert-butyl)phenyl)allyl)-1,3-dimethylindolin-2-one (3b).** Following the typical procedure described above, the reaction was carried out by the mixture of **1a** (60.2 mg, 0.2 mmol, 1.0 equiv), 1-(tert-butyl)-4-vinylbenzene (96.2 mg, 0.6 mmol, 3.0 equiv), Pd(OAc)<sub>2</sub> (4.5 mg, 0.02 mmol, 10 mol%), DPEPhos (21.5 mg, 0.04 mmol, 20 mol%) and *t*-BuOLi (32.0 mg, 0.4 mmol, 2.0 equiv) in 1,4-dioxane (3.0 mL) at room temperature in nitrogen atmosphere under the irradiation of blue LED lamps for 20 hours. Column chromatography on silica gel (EtOAc/Petroleum ether = 1:10) afforded the title product in 94% isolated yield (59.4 mg) and *E* only as a colorless oil; *R<sub>f</sub>* = 0.5 (Hexane: Ethyl acetate = 10:1). **<sup>1</sup>H NMR (400 MHz, CDCl<sub>3</sub>)** δ 7.28 – 7.21 (m, 4H), 7.14 (d, *J* = 8.0 Hz, 2H), 7.06 (td, *J* = 7.6, 1.2 Hz, 1H), 6.82 (d, *J* = 7.6 Hz, 1H), 6.32 (d, *J* = 15.6 Hz, 1H), 5.85 (dt, *J* = 15.6, 7.6 Hz, 1H), 3.18 (s, 3H), 2.64 (ddd, *J* = 8.0, 4.0, 1.2 Hz, 2H), 1.28 (s, 9H). **<sup>13</sup>C NMR (101 MHz, CDCl<sub>3</sub>)** δ 180.2, 150.2, 143.1, 134.5, 133.6, 133.4, 127.8, 125.9, 125.3, 123.3, 122.9, 122.3, 108.0, 48.6, 41.6, 34.5, 31.2, 26.2, 22.6. The spectroscopic data match the reported literature<sup>9</sup>.

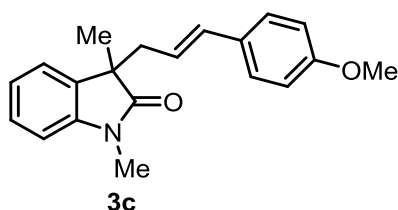

**(E)-3-(3-(4-methoxyphenyl)allyl)-1,3-dimethylindolin-2-one (3c).** Following the typical procedure described above, the reaction was carried out by the mixture of **1a** (60.2 mg, 0.2 mmol, 1.0 equiv), 1-methyl-4-vinylbenzene (98.6 mg, 0.6 mmol, 3.0 equiv), Pd(OAc)<sub>2</sub> (4.5 mg, 0.02 mmol, 10 mol%), DPEPhos (21.5 mg, 0.04 mmol, 20 mol%) and *t*-BuOLi (32.0 mg, 0.4 mmol, 2.0 equiv) in 1,4-dioxane (3.0 mL) at room temperature in nitrogen atmosphere under the irradiation of blue LED lamps for 20 hours. Column chromatography on silica gel (EtOAc/Petroleum ether = 1:10) afforded the title product in 94% isolated yield (57.8 mg) and *E/Z* > 20:1 as a colorless oil; *R<sub>f</sub>* = 0.5 (Hexane: Ethyl acetate = 10:1). **<sup>1</sup>H NMR (400 MHz, CDCl<sub>3</sub>)** δ 7.28 – 7.21 (m, 2H), 7.14 – 7.12 (m, 2H), 7.06 (td, *J* = 7.6, 1.2 Hz, 1H), 6.82 – 6.72 (m, 3H), 6.28 (d, *J* = 15.6 Hz, 1H), 5.74 (ddd, *J* = 15.6, 8.0, 7.6 Hz, 1H), 3.76 (s, 3H), 3.17 (s, 3H), 2.67 – 2.57 (m, 2H), 1.41 (s, 3H). **<sup>13</sup>C NMR (101 MHz, CDCl<sub>3</sub>)** δ 180.2, 158.8, 143.1, 133.6, 133.0, 130.0, 127.7, 127.2, 122.9, 122.3, 121.9, 113.7, 107.9, 55.2, 48.6, 41.6, 26.1, 22.4. The spectroscopic data match the reported literature<sup>9</sup>.

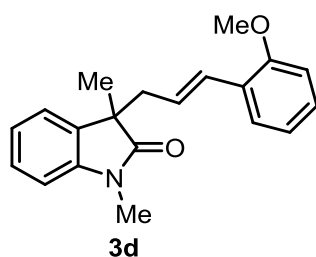

**(E)-3-(3-(2-methoxyphenyl)allyl)-1,3-dimethylindolin-2-one (3d).** Following the typical procedure described above, the reaction was carried out by the mixture of **1a** (60.2 mg, 0.2 mmol, 1.0 equiv), 1-methoxy-2-vinylbenzene (80.6 mg, 0.6 mmol, 3.0 equiv), Pd(OAc)<sub>2</sub> (4.5 mg, 0.02 mmol, 10 mol%), DPEPhos (21.5 mg, 0.04 mmol, 20 mol%) and *t*-BuOLi (32.0 mg, 0.4 mmol, 2.0 equiv) in 1,4-dioxane (3.0 mL) at room temperature in nitrogen atmosphere under the irradiation of blue LED lamps for 20 hours. Column chromatography on silica gel (EtOAc/Petroleum ether = 1:10) afforded the title product in 95% isolated yield (58.0 mg) and *E/Z* > 20:1 as a colorless oil; *R<sub>f</sub>* = 0.5 (Hexane: Ethyl acetate = 10:1). <sup>1</sup>H NMR (400 MHz, CDCl<sub>3</sub>) δ 7.28 – 7.21 (m, 2H), 7.19 – 7.15 (m, 2H), 7.06 (td, *J* = 7.6, 1.2 Hz, 1H), 6.82 (dddd, *J* = 10.0, 9.2, 7.6, 1.2 Hz, 3H), 6.67 – 6.63 (m, 1H), 5.90 (ddd, *J* = 15.6, 8.0, 7.6 Hz, 1H), 3.77 (s, 3H), 3.19 (s, 3H), 2.71 – 2.60 (m, 2H), 1.42 (s, 3H). <sup>13</sup>C NMR (101 MHz, CDCl<sub>3</sub>) δ 180.3, 156.4, 143.1, 133.7, 128.5, 128.2, 127.7, 126.7, 126.5, 124.9, 123.1, 122.3, 120.5, 110.8, 107.9, 55.4, 48.6, 42.0, 26.1, 22.3. The spectroscopic data match the reported literature<sup>9</sup>.

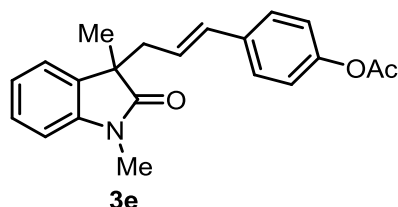

**(E)-4-(3-(1,3-dimethyl-2-oxoindolin-3-yl)prop-1-en-1-yl)phenyl acetate (3e).** Following the typical procedure described above, the reaction was carried out by the mixture of **1a** (60.2 mg, 0.2 mmol, 1.0 equiv), 4-vinylphenyl acetate (97.4 mg, 0.6 mmol, 3.0 equiv), Pd(OAc)<sub>2</sub> (4.5 mg, 0.02 mmol, 10 mol%), DPEPhos (21.5 mg, 0.04 mmol, 20 mol%) and *t*-BuOLi (32.0 mg, 0.4 mmol, 2.0 equiv) in 1,4-dioxane (3.0 mL) at room temperature in nitrogen atmosphere under the irradiation of blue LED lamps for 20 hours. Column chromatography on silica gel (EtOAc/Petroleum ether = 1:10) afforded the title product in 62% isolated yield (41.6 mg) and *E/Z* > 20:1 as a colorless oil; *R<sub>f</sub>* = 0.5 (Hexane: Ethyl acetate = 10:1). <sup>1</sup>H NMR (400 MHz, CDCl<sub>3</sub>) δ 7.29 – 7.18 (m, 4H), 7.07 (td, *J* = 7.6, 1.2 Hz, 1H), 6.96 – 6.94 (m, 2H), 6.83 (d, *J* = 7.6 Hz, 1H), 6.31 (d, *J* = 15.6 Hz, 1H), 5.82 (dt, *J* = 15.6, 7.6 Hz, 1H), 3.19 (s, 3H), 2.65 (dd, *J* = 7.6, 1.2 Hz, 2H), 2.28 (s, 3H), 1.41 (s, 3H). <sup>13</sup>C NMR (101 MHz, CDCl<sub>3</sub>) δ 180.1, 169.5, 149.7, 143.1, 135.0, 133.4, 132.6, 127.9, 127.1, 124.5, 122.9, 122.4, 121.5, 108.0, 48.6, 41.5, 26.1, 22.6, 21.1. **HRMS (ESI)** calcd for C<sub>21</sub>H<sub>21</sub>NO<sub>3</sub>Na [M+Na]<sup>+</sup>: 358.1414, found 358.1407.



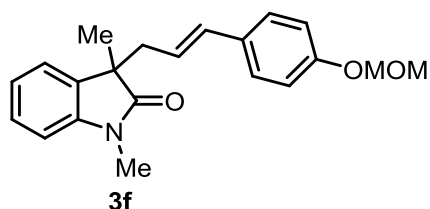

**(E)-3-(3-(4-(methoxymethoxy)phenyl)allyl)-1,3-dimethylindolin-2-one (3f).** Following the typical procedure described above, the reaction was carried out by the mixture of **1a** (60.2 mg, 0.2 mmol, 1.0 equiv), 1-(methoxymethoxy)-4-vinylbenzene (80.6 mg, 0.6 mmol, 3.0 equiv), Pd(OAc)<sub>2</sub> (4.5 mg, 0.02 mmol, 10 mol%), DPEPhos (21.5 mg, 0.04 mmol, 20 mol%) and *t*-BuOLi (32.0 mg, 0.4 mmol, 2.0 equiv) in 1,4-dioxane (3.0 mL) at room temperature in nitrogen atmosphere under the irradiation of blue LED lamps for 20 hours. Column chromatography on silica gel (EtOAc/Petroleum ether = 1:8) afforded the title product in 98% isolated yield (64.2 mg) and *E/Z* = 18:1 as a colorless oil; *R*<sub>f</sub> = 0.5 (Hexane: Ethyl acetate = 8:1). <sup>1</sup>H NMR (400 MHz, CDCl<sub>3</sub>) δ 7.26 – 7.21 (m, 2H), 7.13 – 7.04 (m, 3H), 6.92 – 6.90 (m, 2H), 6.81 (d, *J* = 7.2 Hz, 1H), 6.28 (d, *J* = 15.6 Hz, 1H), 5.75 (ddd, *J* = 15.6, 8.0, 7.2 Hz, 1H), 5.13 (s, 2H), 3.45 (s, 3H), 3.18 (s, 3H), 2.62 (ddd, *J* = 8.0, 3.6, 1.2 Hz, 2H), 1.41 (s, 3H). <sup>13</sup>C NMR (101 MHz, CDCl<sub>3</sub>) δ 180.2, 156.4, 143.1, 133.6, 132.9, 131.2, 127.8, 127.2, 122.9, 122.4, 122.3, 116.1, 107.9, 94.3, 55.9, 48.6, 41.6, 26.1, 22.5. HRMS (ESI) calcd for C<sub>21</sub>H<sub>27</sub>N<sub>2</sub>O<sub>3</sub> [M+NH<sub>4</sub>]<sup>+</sup>: 355.2016, found 355.2014.

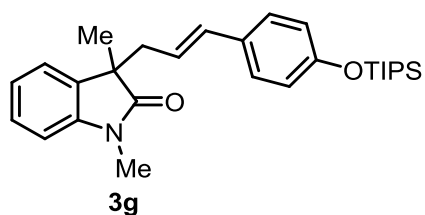

**(E)-1,3-dimethyl-3-(3-(4-((triisopropylsilyl)oxy)phenyl)allyl)indolin-2-one (3g).** Following the typical procedure described above, the reaction was carried out by the mixture of **1a** (60.2 mg, 0.2 mmol, 1.0 equiv), triisopropyl(4-vinylphenoxy)silane (165.8 mg, 0.6 mmol, 3.0 equiv), Pd(OAc)<sub>2</sub> (4.5 mg, 0.02 mmol, 10 mol%), DPEPhos (21.5 mg, 0.04 mmol, 20 mol%) and *t*-BuOLi (32.0 mg, 0.4 mmol, 2.0 equiv) in 1,4-dioxane (3.0 mL) at room temperature in nitrogen atmosphere under the irradiation of blue LED lamps for 20 hours. Column chromatography on silica gel (EtOAc/Petroleum ether = 1:8) afforded the title product in 63% isolated yield (56.6 mg) and *E* only as a colorless oil; *R*<sub>f</sub> = 0.5 (Hexane: Ethyl acetate = 10:1). <sup>1</sup>H NMR (400 MHz, CDCl<sub>3</sub>) δ 7.29 – 7.22 (m, 2H), 7.07 (dd, *J* = 8.0, 6.4 Hz, 3H), 6.84 – 6.74 (m, 3H), 6.28 (d, *J* = 15.6 Hz, 1H), 5.74 (ddd, *J* = 15.6, 8.0, 7.2 Hz, 1H), 3.18 (s, 3H), 2.65 – 2.56 (m, 2H), 1.41 (s, 3H), 1.27 – 1.19 (m, 3H), 1.08 (d, *J* = 7.2 Hz, 18H). <sup>13</sup>C NMR (101 MHz, CDCl<sub>3</sub>) δ 180.3, 155.4, 143.1, 133.7, 133.2, 130.2, 127.7, 127.2, 123.0, 122.3, 121.8, 119.7, 107.9, 48.6, 41.6, 26.1, 22.4, 17.9, 12.6. HRMS (ESI) calcd for C<sub>28</sub>H<sub>40</sub>NO<sub>2</sub>Si [M+H]<sup>+</sup>: 450.2823, found 450.2815.

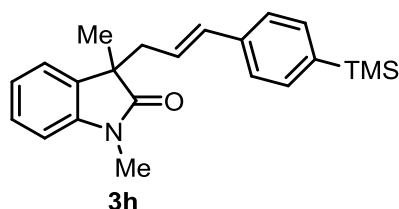

**(E)-1,3-dimethyl-3-(3-(4-(trimethylsilyl)phenyl)allyl)indolin-2-one (3h).** Following the typical procedure described above, the reaction was carried out by the mixture of **1a** (60.2 mg, 0.2 mmol, 1.0 equiv), trimethyl(4-vinylphenyl)silane (105.8 mg, 0.6 mmol, 3.0 equiv), Pd(OAc)<sub>2</sub> (4.5 mg, 0.02 mmol, 10 mol%), DPEPhos (21.5 mg, 0.04 mmol, 20 mol%) and *t*-BuOLi (32.0 mg, 0.4 mmol, 2.0 equiv) in 1,4-dioxane (3.0 mL) at room temperature in nitrogen atmosphere under the irradiation of blue LED lamps for 20 hours. Column chromatography on silica gel (EtOAc/Petroleum ether = 1:10) afforded the title product in 68% isolated yield (47.2 mg) and *E/Z* = 15:1 as a colorless oil; *R<sub>f</sub>* = 0.5 (Hexane: Ethyl acetate = 10:1). <sup>1</sup>H NMR (400 MHz, CDCl<sub>3</sub>) δ 7.41 – 7.39 (m, 2H), 7.28 – 7.17 (m, 4H), 7.05 (dd, *J* = 7.6, 1.2 Hz, 1H), 6.81 (d, *J* = 7.6 Hz, 1H), 6.34 (d, *J* = 15.6 Hz, 1H), 5.91 (dt, *J* = 15.6, 7.6 Hz, 1H), 3.18 (s, 3H), 2.65 (dt, *J* = 7.6, 1.2 Hz, 2H), 1.41 (s, 3H), 0.23 (s, 9H). <sup>13</sup>C NMR (101 MHz, CDCl<sub>3</sub>) δ 181.4, 144.3, 140.5, 138.8, 134.8, 134.7, 134.6, 129.0, 126.7, 125.7, 124.1, 123.5, 109.2, 49.8, 42.8, 27.3, 23.8, 0.0. HRMS (ESI) calcd for C<sub>22</sub>H<sub>31</sub>N<sub>2</sub>OSi [M+NH<sub>4</sub>]<sup>+</sup>: 367.2200, found 367.2196.

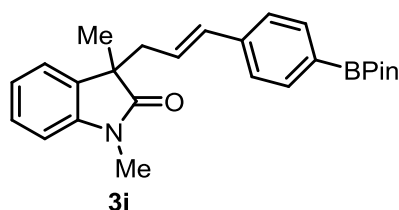

**(E)-1,3-dimethyl-3-(3-(4-(4,4,5,5-tetramethyl-1,3,2-dioxaborolan-2-yl)phenyl)allyl)indolin-2-one (3i).** Following the typical procedure described above, the reaction was carried out by the mixture of **1a** (60.2 mg, 0.2 mmol, 1.0 equiv), 4,4,5,5-tetramethyl-2-(4-vinylphenyl)-1,3,2-dioxaborolane (138.2 mg, 0.6 mmol, 3.0 equiv), Pd(OAc)<sub>2</sub> (4.5 mg, 0.02 mmol, 10 mol%), DPEPhos (21.5 mg, 0.04 mmol, 20 mol%) and *t*-BuOLi (32.0 mg, 0.4 mmol, 2.0 equiv) in 1,4-dioxane (3.0 mL) at room temperature in nitrogen atmosphere under the irradiation of blue LED lamps for 20 hours. Column chromatography on silica gel (EtOAc/Petroleum ether = 1:10) afforded the title product in 95% isolated yield (59.0 mg) and *E/Z* > 20:1 as a colorless oil; *R<sub>f</sub>* = 0.5 (Hexane: Ethyl acetate = 10:1). <sup>1</sup>H NMR (400 MHz, CDCl<sub>3</sub>) δ 7.69 – 7.67 (m, 2H), 7.28 – 7.18 (m, 5H), 7.07 (td, *J* = 7.6, 1.2 Hz, 1H), 6.80 (dd, *J* = 7.6, 1.2 Hz, 1H), 6.34 (d, *J* = 15.6 Hz, 1H), 5.95 (ddd, *J* = 15.6, 8.0, 7.6 Hz, 1H), 3.17 (s, 3H), 2.68 – 2.60 (m, 2H), 1.42 (s, 3H), 1.32 (s, 12H). <sup>13</sup>C NMR (101 MHz, CDCl<sub>3</sub>) δ 180.2, 143.1, 139.9, 134.9, 133.7, 133.4, 127.8, 125.4, 125.3, 122.9, 122.4, 108.0, 83.7, 48.6, 41.7, 26.1, 24.8, 24.8, 22.5. HRMS (ESI) calcd for C<sub>25</sub>H<sub>34</sub>BN<sub>2</sub>O<sub>3</sub> [M+NH<sub>4</sub>]<sup>+</sup>: 421.2657, found 421.2651.

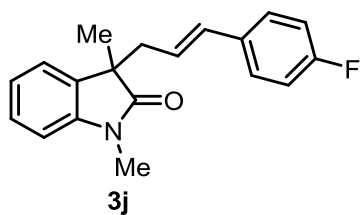

**(E)-3-(3-(4-fluorophenyl)allyl)-1,3-dimethylindolin-2-one (3j).** Following the typical procedure described above, the reaction was carried out by the mixture of **1a** (60.2 mg, 0.2 mmol, 1.0 equiv), 1-fluoro-4-vinylbenzene (73.1 mg, 0.6 mmol, 3.0 equiv), Pd(OAc)<sub>2</sub> (4.5mg, 0.02 mmol, 10 mol%), DPEPhos (21.5 mg, 0.04 mmol, 20 mol%) and *t*-BuOLi (32.2 mg, 0.4 mmol, 2.0 equiv) in 1,4-dioxane (3.0 mL) at room temperature in nitrogen atmosphere under the irradiation of blue LED lamps for 20 hours. Column chromatography on silica gel (EtOAc/Petroleum ether = 1:10) afforded the title product in 77% isolated yield (43.5 mg) and *E* only as a colorless oil; *R*<sub>f</sub> = 0.5 (Hexane: Ethyl acetate = 10:1). **<sup>1</sup>H NMR (400 MHz, CDCl<sub>3</sub>)** δ 7.29 – 7.21 (m, 2H), 7.16 – 7.12 (m, 2H), 7.07 (td, *J* = 7.6, 0.8 Hz, 1H), 6.94 – 6.89 (m, 2H), 6.83 (dt, *J* = 7.6, 0.8 Hz, 1H), 6.32 – 6.28 (m, 1H), 5.78 (dt, *J* = 15.6, 7.6 Hz, 1H), 3.18 (s, 3H), 2.64 (dd, *J* = 8.0, 1.2 Hz, 2H), 1.41 (s, 3H). **<sup>13</sup>C NMR (101 MHz, CDCl<sub>3</sub>)** δ 180.1, 160.2 (d, <sup>1</sup>*J*<sub>C-F</sub> = 247.2 Hz), 143.1, 133.5, 133.3 (d, <sup>3</sup>*J*<sub>C-F</sub> = 3.3 Hz), 132.4, 127.8, 127.5 (d, <sup>3</sup>*J*<sub>C-F</sub> = 8.0 Hz), 123.9 (d, <sup>4</sup>*J*<sub>C-F</sub> = 2.3 Hz), 123.9, 122.6 (d, <sup>2</sup>*J*<sub>C-F</sub> = 46.3 Hz), 115.2 (d, <sup>2</sup>*J*<sub>C-F</sub> = 21.7 Hz), 108.0, 48.6, 41.5, 26.1, 22.5. **<sup>19</sup>F NMR (376 MHz, CDCl<sub>3</sub>)** δ -115.0. **HRMS (ESI)** calcd for C<sub>19</sub>H<sub>19</sub>FNO [M+H]<sup>+</sup>: 296.1445, found 296.1441.

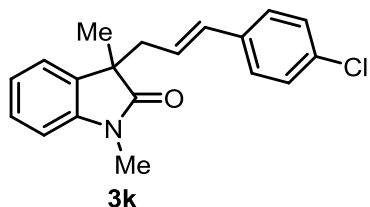

**(E)-3-(3-(4-chlorophenyl)allyl)-1,3-dimethylindolin-2-one (3k).** Following the typical procedure described above, the reaction was carried out by the mixture of **1a** (60.2 mg, 0.2 mmol, 1.0 equiv), 1-chloro-4-vinylbenzene (83.1 mg, 0.6 mmol, 3.0 equiv), Pd(OAc)<sub>2</sub> (4.5mg, 0.02 mmol, 10 mol%), DPEPhos (21.5 mg, 0.04 mmol, 20 mol%) and *t*-BuOLi (32.0 mg, 0.4 mmol, 2.0 equiv) in 1,4-dioxane (3.0 mL) at room temperature in nitrogen atmosphere under the irradiation of blue LED lamps for 20 hours. Column chromatography on silica gel (EtOAc/Petroleum ether = 1:10) afforded the title product in 83% isolated yield (48.9 mg) and *E* only as a colorless oil; *R*<sub>f</sub> = 0.5 (Hexane: Ethyl acetate = 10:1). **<sup>1</sup>H NMR (400 MHz, CDCl<sub>3</sub>)** δ 7.29 – 7.18 (m, 4H), 7.11 – 7.06 (m, 3H), 6.83 (d, *J* = 7.6 Hz, 1H), 6.29 (d, *J* = 15.6 Hz, 1H), 5.91 – 5.79 (m, 1H), 3.18 (d, *J* = 1.6 Hz, 3H), 2.64 (d, *J* = 7.6 Hz, 2H), 1.42 (d, *J* = 1.6 Hz, 3H). **<sup>13</sup>C NMR (101 MHz, CDCl<sub>3</sub>)** δ 180.0, 143.1, 135.6, 133.4, 132.7, 132.4, 128.5, 127.9, 127.3, 124.9, 122.8, 122.4, 108.0, 48.6, 41.6, 26.1, 22.5. The spectroscopic data match the reported literature<sup>9</sup>.

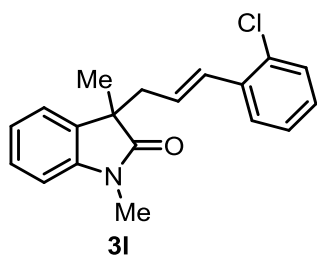

**(E)-3-(3-(2-chlorophenyl)allyl)-1,3-dimethylindolin-2-one (31).** Following the typical procedure described above, the reaction was carried out by the mixture of **1a** (60.2 mg, 0.2 mmol, 1.0 equiv), 1-chloro-2-vinylbenzene (83.1 mg, 0.6 mmol, 3.0 equiv), Pd(OAc)<sub>2</sub> (4.5mg, 0.02 mmol, 10 mol%), DPEPhos (21.5. mg, 0.04 mmol, 20 mol%) and *t*-BuOLi (32.0 mg, 0.4 mmol, 2.0 equiv) in 1,4-dioxane (3.0 mL) at room temperature in nitrogen atmosphere under the irradiation of blue LED lamps for 20 hours. Column chromatography on silica gel (EtOAc/Petroleum ether = 1:10) afforded the title product in 80% isolated yield (49.7 mg) and *E* only as a colorless oil; *R<sub>f</sub>* = 0.5 (Hexane: Ethyl acetate = 10:1). **<sup>1</sup>H NMR (400 MHz, CDCl<sub>3</sub>)** δ 7.29 – 7.23 (m, 4H), 7.15 – 7.06 (m, 3H), 6.83 (d, *J* = 7.6 Hz, 1H), 6.68 (d, *J* = 15.6 Hz, 1H), 5.88 (dt, *J* = 15.6, 7.6 Hz, 1H), 3.20 (s, 3H), 2.69 (dd, *J* = 7.6, 1.2 Hz, 2H), 1.43 (s, 3H). **<sup>13</sup>C NMR (101 MHz, CDCl<sub>3</sub>)** δ 180.0, 143.0, 135.5, 133.4, 132.7, 160.2, 129.5, 128.2, 127.9, 127.3, 126.9, 126.6, 122.9, 122.5, 108.0, 48.5, 41.6, 26.2, 22.5. **HRMS (ESI)** calcd for C<sub>19</sub>H<sub>19</sub>ClNO [M+H]<sup>+</sup>: 312.1150, found 312.1147.

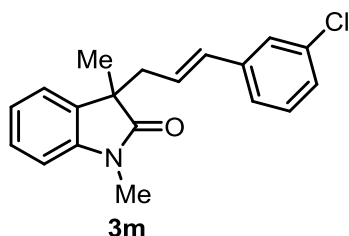

**(E)-3-(3-(3-chlorophenyl)allyl)-1,3-dimethylindolin-2-one (3m).** Following the typical procedure described above, the reaction was carried out by the mixture of **1a** (60.2 mg, 0.2 mmol, 1.0 equiv), 1-chloro-3-vinylbenzene (83.1 mg, 0.6 mmol, 3.0 equiv), Pd(OAc)<sub>2</sub> (4.5mg, 0.02 mmol, 10 mol%), DPEPhos (21.5 mg, 0.04 mmol, 20 mol%) and *t*-BuOLi (32.0 mg, 0.4 mmol, 2.0 equiv) in 1,4-dioxane (3.0 mL) at room temperature in nitrogen atmosphere under the irradiation of blue LED lamps for 20 hours. Column chromatography on silica gel (EtOAc/Petroleum ether = 1:10) afforded the title product in 78% isolated yield (48.5 mg) and *E* only as a colorless oil; *R<sub>f</sub>* = 0.5 (Hexane: Ethyl acetate = 10:1). **<sup>1</sup>H NMR (400 MHz, CDCl<sub>3</sub>)** δ 7.28 – 7.21 (m, 2H), 7.17 – 7.10 (m, 3H), 7.10 – 7.04 (m, 2H), 6.83 (d, *J* = 7.6 Hz, 1H), 6.28 (d, *J* = 15.6 Hz, 1H), 5.89 (dt, *J* = 15.6, 7.6 Hz, 1H), 3.19 (s, 3H), 2.65 (dd, *J* = 7.7, 1.2 Hz, 2H), 1.42 (s, 3H). **<sup>13</sup>C NMR (101 MHz, CDCl<sub>3</sub>)** δ 180.0, 143.1, 139.0, 134.3, 133.4, 132.4, 129.6, 127.9, 127.1, 126.0, 125.8, 124.4, 122.9, 122.5, 108.1, 48.5, 41.5, 26.2, 22.6. **HRMS (ESI)** calcd for C<sub>19</sub>H<sub>22</sub>ClN<sub>2</sub>O [M+NH<sub>4</sub>]<sup>+</sup>: 329.1415, found 329.1410.

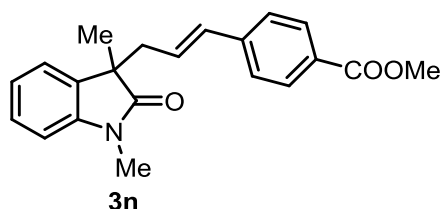

**Methyl (*E*)-4-(3-(1,3-dimethyl-2-oxoindolin-3-yl)prop-1-en-1-yl)benzoate (3n).** Following the typical procedure described above, the reaction was carried out by the mixture of **1a** (60.2 mg, 0.2 mmol, 1.0 equiv), methyl 4-vinylbenzoate (97.4 mg, 0.4 mmol, 3.0 equiv), Pd(OAc)<sub>2</sub> (4.5 mg, 0.02 mmol, 10 mol%), DPEPhos (21.5 mg, 0.04 mmol, 20 mol%) and *t*-BuOLi (32.0 mg, 0.4 mmol, 2.0 equiv) in 1,4-dioxane (3.0 mL) at room temperature in nitrogen atmosphere under the irradiation of blue LED lamps for 20 hours. Column chromatography on silica gel (EtOAc/Petroleum ether = 1:5) afforded the title product in 89% isolated yield (60.2 mg) and *E* only as a colorless oil; *R<sub>f</sub>* = 0.5 (Hexane: Ethyl acetate = 5:1). **<sup>1</sup>H NMR (400 MHz, CDCl<sub>3</sub>)** δ 7.90 (d, *J* = 8.4 Hz, 2H), 7.28 – 7.20 (m, 4H), 7.08 (td, *J* = 7.6, 1.2 Hz, 1H), 6.83 (d, *J* = 7.6 Hz, 1H), 6.38 (d, *J* = 15.6 Hz, 1H), 6.00 (dt, *J* = 15.6, 7.6 Hz, 1H), 3.88 (s, 3H), 3.18 (s, 3H), 2.68 (dd, *J* = 7.5, 1.3 Hz, 2H), 1.43 (s, 3H). **<sup>13</sup>C NMR (101 MHz, CDCl<sub>3</sub>)** δ 180.0, 166.8, 143.0, 141.6, 133.3, 132.8, 129.8, 128.6, 128.0, 127.2, 126.0, 122.8, 122.5, 108.0, 52.0, 48.5, 41.6, 26.1, 22.6. **HRMS (ESI)** calcd for C<sub>21</sub>H<sub>25</sub>N<sub>2</sub>O<sub>3</sub> [M+NH<sub>4</sub>]<sup>+</sup>: 353.1860, found 353.1858.

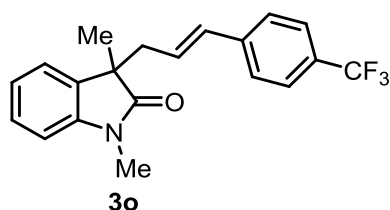

**(*E*)-1,3-dimethyl-3-(3-(4-(trifluoromethyl)phenyl)allyl)indolin-2-one (3o).** Following the typical procedure described above, the reaction was carried out by the mixture of **1a** (60.2 mg, 0.2 mmol, 1.0 equiv), 1-(trifluoromethyl)-4-vinylbenzene (103.2 mg, 0.6 mmol, 3.0 equiv), Pd(OAc)<sub>2</sub> (4.5 mg, 0.02 mmol, 10 mol%), DPEPhos (21.5 mg, 0.04 mmol, 20 mol%) and *t*-BuOLi (32.0 mg, 0.4 mmol, 2.0 equiv) in 1,4-dioxane (3.0 mL) at room temperature in nitrogen atmosphere under the irradiation of blue LED lamps for 20 hours. Column chromatography on silica gel (EtOAc/Petroleum ether = 1:10) afforded the title product in 81% isolated yield (55.2 mg) and *E* only as a colorless oil; *R<sub>f</sub>* = 0.5 (Hexane: Ethyl acetate = 10:1). **<sup>1</sup>H NMR (400 MHz, CDCl<sub>3</sub>)** δ 7.48 (d, *J* = 8.0 Hz, 2H), 7.28 – 7.22 (m, 4H), 7.09 (td, *J* = 7.6, 1.2 Hz, 1H), 6.83 (d, *J* = 7.6 Hz, 1H), 6.37 (d, *J* = 15.6 Hz, 1H), 5.97 (dt, *J* = 15.6, 7.6 Hz, 1H), 3.18 (s, 3H), 2.75 – 2.63 (m, 2H), 1.43 (s, 3H). **<sup>13</sup>C NMR (101 MHz, CDCl<sub>3</sub>)** δ 180.0, 143.1, 140.6, 133.3, 132.4, 129.0(q, <sup>2</sup>*J*<sub>C-F</sub> = 32.5 Hz), 128.0, 127.1, 126.2, 125.3(q, <sup>3</sup>*J*<sub>C-F</sub> = 3.8 Hz), 124.2(q, <sup>1</sup>*J*<sub>C-F</sub> = 272.9 Hz), 122.8, 122.5, 108.1, 48.6, 41.6, 26.1, 22.6. **<sup>19</sup>F NMR (376 MHz, CDCl<sub>3</sub>)** δ -62.5. **HRMS (ESI)** calcd for C<sub>20</sub>H<sub>19</sub>F<sub>3</sub>NO [M+H]<sup>+</sup>: 346.1413, found 346.1409.

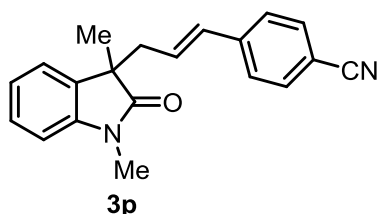

**(E)-4-(3-(1,3-dimethyl-2-oxindolin-3-yl)prop-1-en-1-yl)benzonitrile (3p).** Following the typical procedure described above, the reaction was carried out by the mixture of **1a** (60.2 mg, 0.2 mmol, 1.0 equiv), 4-vinylbenzonitrile (77.5 mg, 0.6 mmol, 3.0 equiv), Pd(OAc)<sub>2</sub> (4.5 mg, 0.02 mmol, 10 mol%), DPEPhos (21.5 mg, 0.04 mmol, 20 mol%) and *t*-BuOLi (32.0 mg, 0.4 mmol, 2.0 equiv) in 1,4-dioxane (3.0 mL) at room temperature in nitrogen atmosphere under the irradiation of blue LED lamps for 20 hours. Column chromatography on silica gel (EtOAc/Petroleum ether = 1:10) afforded the title product in 82% isolated yield (49.5 mg) and *E* only as a colorless oil; *R*<sub>f</sub> = 0.5 (Hexane: Ethyl acetate = 10:1). **<sup>1</sup>H NMR (400 MHz, CDCl<sub>3</sub>)** δ 7.52 – 7.50 (m, 2H), 7.31 – 7.21 (m, 4H), 7.09 (td, *J* = 7.5, 1.0 Hz, 1H), 6.84 (dt, *J* = 7.8, 0.8 Hz, 1H), 6.38 – 6.33 (m, 1H), 6.01 (ddd, *J* = 15.8, 7.9, 7.1 Hz, 1H), 3.18 (s, 3H), 2.74 – 2.66 (m, 2H), 1.43 (s, 3H). **<sup>13</sup>C NMR (101 MHz, CDCl<sub>3</sub>)** δ 179.9, 143.1, 141.6, 133.2, 132.3, 132.1, 128.6, 128.1, 126.6, 122.8, 122.6, 119.0, 110.4, 108.2, 48.6, 41.6, 26.2, 22.7. **HRMS (ESI)** calcd for C<sub>20</sub>H<sub>19</sub>N<sub>2</sub>O [M+H]<sup>+</sup>: 303.1492, found 303.1484.

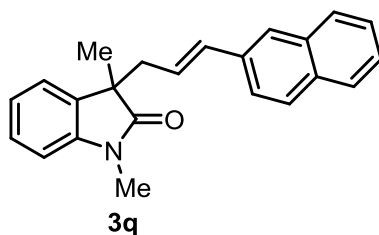

**(E)-1,3-dimethyl-3-(3-(naphthalen-2-yl)allyl)indolin-2-one (3q).** Following the typical procedure described above, the reaction was carried out by the mixture of **1a** (60.2 mg, 0.2 mmol, 1.0 equiv), 2-vinylnaphthalene (92.4 mg, 0.6 mmol, 3.0 equiv), Pd(OAc)<sub>2</sub> (4.5 mg, 0.02 mmol, 10 mol%), DPEPhos (21.5 mg, 0.04 mmol, 20 mol%) and *t*-BuOLi (32.0 mg, 0.4 mmol, 2.0 equiv) in 1,4-dioxane (3.0 mL) at room temperature in nitrogen atmosphere under the irradiation of blue LED lamps for 20 hours. Column chromatography on silica gel (EtOAc/Petroleum ether = 1:5) afforded the title product in 77% isolated yield (50.6 mg) and *E* only as a colorless oil; *R*<sub>f</sub> = 0.5 (Hexane: Ethyl acetate = 5:1). **<sup>1</sup>H NMR (400 MHz, CDCl<sub>3</sub>)** δ 7.56 – 7.53 (m, 2H), 7.49 – 7.47 (m, 2H), 7.41 (t, *J* = 7.6 Hz, 2H), 7.34 – 7.23 (m, 5H), 7.08 (td, *J* = 7.6, 1.2 Hz, 1H), 6.83 (d, *J* = 7.6 Hz, 1H), 6.38 (d, *J* = 15.6 Hz, 1H), 5.93 (dt, *J* = 15.6, 7.6 Hz, 1H), 3.19 (s, 3H), 2.69 – 2.66 (m, 2H), 1.43 (s, 3H). **<sup>13</sup>C NMR (101 MHz, CDCl<sub>3</sub>)** δ 180.2, 143.1, 140.6, 139.9, 136.2, 133.5, 133.2, 128.7, 127.8, 127.2, 127.1, 126.8, 126.5, 124.3, 122.9, 122.4, 108.0, 48.6, 41.6, 26.1, 22.5. The spectroscopic data match the reported literature<sup>9</sup>.

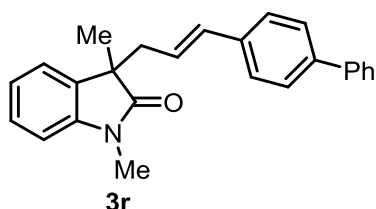

**(E)-3-(3-((1,1'-biphenyl)-4-yl)allyl)-1,3-dimethylindolin-2-one (3r).** Following the typical procedure described above, the reaction was carried out by the mixture of **1a** (60.2 mg, 0.2 mmol, 1.0 equiv), 4-vinyl-1,1'-biphenyl (100.2 mg, 0.6 mmol, 3.0 equiv), Pd(OAc)<sub>2</sub> (4.5 mg, 0.02 mmol, 10 mol%), DPEPhos (21.5 mg, 0.04 mmol, 20 mol%) and *t*-BuOLi (32.0 mg, 0.4 mmol, 2.0 equiv) in 1,4-dioxane (3.0 mL) at room temperature in nitrogen atmosphere under the irradiation of blue LED lamps for 20 hours. Column chromatography on silica gel (EtOAc/Petroleum ether = 1:5) afforded the title product in 72% isolated yield (50.6 mg) and *E* only as a colorless oil;  $R_f = 0.5$  (Hexane: Ethyl acetate = 5:1). **<sup>1</sup>H NMR (400 MHz, CDCl<sub>3</sub>)**  $\delta$  7.56 – 7.54 (m, 2H), 7.49 – 7.46 (m, 2H), 7.43 – 7.39 (m, 2H), 7.34 – 7.23 (m, 5H), 7.08 (td,  $J = 7.6, 1.2$  Hz, 1H), 6.83 (dt,  $J = 7.6, 0.8$  Hz, 1H), 6.38 (dd,  $J = 15.6, 1.2$  Hz, 1H), 5.93 (ddd,  $J = 15.6, 8.0, 7.2$  Hz, 1H), 3.19 (s, 3H), 2.69 – 2.66 (m, 2H), 1.43 (s, 3H). **<sup>13</sup>C NMR (101 MHz, CDCl<sub>3</sub>)**  $\delta$  180.2, 143.2, 140.7, 140.0, 136.3, 133.6, 133.3, 128.8, 127.9, 127.3, 127.2, 126.9, 126.6, 124.4, 123.0, 122.5, 108.1, 48.7, 41.7, 26.2, 22.6. **HRMS (ESI)** calcd for C<sub>25</sub>H<sub>27</sub>N<sub>2</sub>O [M+NH<sub>4</sub>]<sup>+</sup>: 371.2118, found 371.2113.

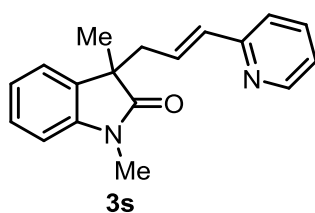

**(E)-1,3-dimethyl-3-(3-(pyridin-2-yl)allyl)indolin-2-one (3s).** Following the typical procedure described above, the reaction was carried out by the mixture of **1a** (60.2 mg, 0.2 mmol, 1.0 equiv), 2-vinylpyridine (62.5 mg, 0.6 mmol, 3.0 equiv), Pd(OAc)<sub>2</sub> (4.5 mg, 0.02 mmol, 10 mol%), DPEPhos (21.5 mg, 0.04 mmol, 20 mol%) and *t*-BuOLi (32.0 mg, 0.4 mmol, 2.0 equiv) in 1,4-dioxane (3.0 mL) at room temperature in nitrogen atmosphere under the irradiation of blue LED lamps for 20 hours. Column chromatography on silica gel (EtOAc/Petroleum ether = 1:5) afforded the title product in 84% isolated yield (46.4 mg) and *E* only as a colorless oil;  $R_f = 0.5$  (Hexane: Ethyl acetate = 5:1). **<sup>1</sup>H NMR (400 MHz, CDCl<sub>3</sub>)**  $\delta$  8.48 (ddd,  $J = 4.8, 2.0, 0.8$  Hz, 1H), 7.56 (td,  $J = 7.6, 2.0$  Hz, 1H), 7.29 – 7.24 (m, 2H), 7.15 (dt,  $J = 8.0, 1.2$  Hz, 1H), 7.09 – 7.05 (m, 2H), 6.83 (d,  $J = 7.6$  Hz, 1H), 6.46 (q,  $J = 2.0$  Hz, 2H), 3.20 (s, 3H), 2.70 (qdd,  $J = 13.6, 4.4, 2.0$  Hz, 2H), 1.44 (s, 3H). **<sup>13</sup>C NMR (101 MHz, CDCl<sub>3</sub>)**  $\delta$  180.1, 155.3, 149.3, 143.0, 136.3, 133.7, 133.4, 129.0, 127.8, 123.1, 122.5, 121.9, 121.2, 108.0, 48.3, 41.3, 26.2, 22.6. **HRMS (ESI)** calcd for C<sub>18</sub>H<sub>19</sub>N<sub>2</sub>O [M+H]<sup>+</sup>: 279.1492, found 279.1495.

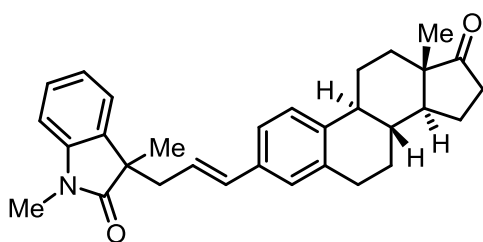

**3t**

**1,3-dimethyl-3-((*E*)-3-((8*R*,9*S*,13*S*,14*S*)-13-methyl-17-oxo-7,8,9,11,12,13,14,15,16,17-decahydro-6*H*-cyclopenta[*a*]phenanthren-3-yl)allyl)indolin-2-one (3t).** Following the typical procedure described above, the reaction was carried out by the mixture of **1a** (60.2 mg, 0.2 mmol, 1.0 equiv), (8*R*,9*S*,13*S*,14*S*)-13-methyl-3-vinyl-6,7,8,9,11,12,13,14,15,16-decahydro-17*H*-cyclopenta[*a*]phenanthren-17-one (168.5 mg, 0.6 mmol, 3.0 equiv), Pd(OAc)<sub>2</sub> (4.5mg, 0.02 mmol, 10 mol%), DPEPhos (21.5 mg, 0.04 mmol, 20 mol%) and *t*-BuOLi (32.0 mg, 0.4 mmol, 2.0 equiv) in 1,4-dioxane (3.0 mL) at room temperature in nitrogen atmosphere under the irradiation of blue LED lamps for 20 hours. Column chromatography on silica gel (EtOAc/Petroleum ether = 1:5) afforded the title product in 67% isolated yield (60.1 mg) and *E* only as a colorless oil; *R<sub>f</sub>* = 0.5 (Hexane: Ethyl acetate = 10:1). <sup>1</sup>H NMR (400 MHz, CDCl<sub>3</sub>) δ 7.30 – 7.21 (m, 2H), 7.17 (d, *J* = 8.0 Hz, 1H), 7.08 – 6.99 (m, 2H), 6.95 (d, *J* = 2.0 Hz, 1H), 6.82 (dt, *J* = 7.6, 0.8 Hz, 1H), 6.29 (d, *J* = 15.6 Hz, 1H), 5.87 (dddd, *J* = 15.6, 8.0, 7.2, 2.8 Hz, 1H), 3.18 (s, 3H), 2.86 (dd, *J* = 9.2, 4.0 Hz, 2H), 2.65 – 2.61 (m, 2H), 2.53 – 2.46 (m, 1H), 2.38 (dq, *J* = 9.2, 2.4 Hz, 1H), 2.28 – 2.23 (m, 1H), 2.18 – 1.92 (m, 5H), 1.67 – 1.46 (m, 5H), 1.41 (s, 3H), 0.89 (s, 3H). <sup>13</sup>C NMR (101 MHz, CDCl<sub>3</sub>) δ 180.3, 143.1, 138.9, 136.5, 134.9, 133.7, 133.4, 127.8, 126.9, 125.5, 125.4, 123.6, 123.0, 122.4, 108.0, 50.5, 48.7, 48.0, 44.4, 41.6, 38.2, 35.9, 31.6, 29.4, 26.5, 26.2, 25.7, 22.6, 21.6, 13.8. HRMS (ESI) calcd for C<sub>31</sub>H<sub>36</sub>NO<sub>2</sub> [M+H]<sup>+</sup>: 454.2741, found 454.2733.

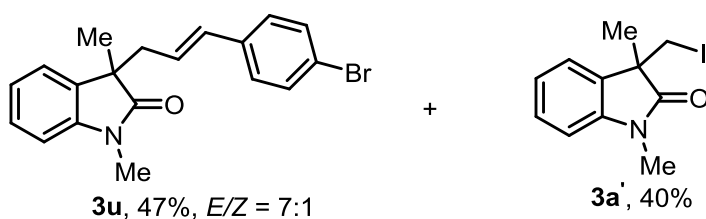

**(*E*)-3-(3-(4-bromophenyl)allyl)-1,3-dimethylindolin-2-one (3u).** Following the typical procedure described above, the reaction was carried out by the mixture of **1a** (60.2 mg, 0.2 mmol, 1.0 equiv), 1-bromo-4-vinylbenzene (109.9 mg, 0.6 mmol, 3.0 equiv), Pd(OAc)<sub>2</sub> (4.5mg, 0.02 mmol, 10 mol%), DPEPhos (21.5 mg, 0.04 mmol, 20 mol%) and *t*-BuOLi (32.0 mg, 0.4 mmol, 2.0 equiv) in 1,4-dioxane (3.0 mL) at room temperature in nitrogen atmosphere under the irradiation of blue LED lamps for 20 hours. Column chromatography on silica gel (EtOAc/Petroleum ether = 1:10) afforded the desired product **3u** (*E/Z* = 13:1) in 47% yield and byproduct **3a'** in 40% yield as a mixture colorless oil (52.1 mg); *R<sub>f</sub>* = 0.5 (Hexane: Ethyl acetate = 10:1).



**(E)-3-(3-(4-bromophenyl)allyl)-1,3-dimethylindolin-2-one (3u).**  $^1\text{H NMR}$  (400 MHz,  $\text{CDCl}_3$ )  $\delta$  7.36 – 7.32 (m, 1H), 7.29 – 7.20 (m, 3H), 7.13 – 7.03 (m, 3H), 6.82 (dt,  $J = 7.6, 0.8$  Hz, 1H), 6.29 – 6.25 (d,  $J = 15.6$ , 1H), 5.86 (dt,  $J = 15.6, 7.6$  Hz, 1H), 3.17 (s, 3H), 2.64 (dd,  $J = 7.6, 1.2$  Hz, 2H), 1.41 (s, 3H).  $^{13}\text{C NMR}$  (101 MHz,  $\text{CDCl}_3$ )  $\delta$  180.0, 143.0, 136.1, 133.4, 132.4, 131.4, 127.9, 127.6, 125.1, 122.6, 122.4, 120.9, 108.0, 48.5, 41.6, 26.1, 22.5. The spectroscopic data match the reported literature<sup>10</sup>.

**3-(Iodomethyl)-1,3-dimethylindolin-2-one (3a').**  $^1\text{H NMR}$  (400 MHz,  $\text{CDCl}_3$ )  $\delta$  7.34 – 7.32 (m, 1H), 7.29 – 7.25 (m, 1H), 7.10 (td,  $J = 7.6, 1.2$  Hz, 1H), 6.87 (d,  $J = 7.6$  Hz, 1H), 3.51 (d,  $J = 9.6$  Hz, 1H), 3.42 (d,  $J = 9.6$  Hz, 1H), 3.25 (s, 3H), 1.52 (s, 3H).  $^{13}\text{C NMR}$  (101 MHz,  $\text{CDCl}_3$ )  $\delta$  177.9, 143.1, 132.6, 128.6, 122.8, 122.7, 108.3, 48.6, 26.3, 22.9, 10.8. The spectroscopic data match the reported literature<sup>1</sup>.

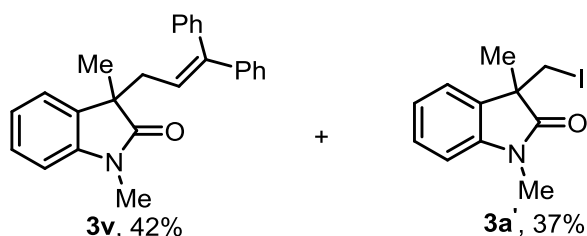

**3-(3,3-Diphenylallyl)-1,3-dimethylindolin-2-one (3v).** Following the typical procedure described above, the reaction was carried out by the mixture of **1a** (60.2 mg, 0.2 mmol, 1.0 equiv), ethene-1,1-diyldibenzene (108.2 mg, 0.6 mmol, 3.0 equiv),  $\text{Pd}(\text{OAc})_2$  (4.5 mg, 0.02 mmol, 10 mol%), DPEPhos (21.5 mg, 0.04 mmol, 20 mol%) and *t*-BuOLi (32.0 mg, 0.4 mmol, 2.0 equiv) in 1,4-dioxane (3.0 mL) at room temperature in nitrogen atmosphere under the irradiation of blue LED lamps for 20 hours. Column chromatography on silica gel (EtOAc/Petroleum ether = 1:10) afforded the desired product **3v** in 42% and byproduct **3a'** in 37% as a mixture colorless oil (51.2 mg);  $R_f = 0.5$  (Hexane: Ethyl acetate = 10:1).

**3-(3,3-Diphenylallyl)-1,3-dimethylindolin-2-one (3v).**  $^1\text{H NMR}$  (400 MHz,  $\text{CDCl}_3$ )  $\delta$  7.36 – 7.30 (m, 3H), 7.28 – 7.24 (m, 1H), 7.19 – 7.15 (m, 3H), 7.14 – 7.06 (m, 1H), 7.02 – 6.96 (m, 5H), 6.91 – 6.84 (m, 1H), 5.74 (dd,  $J = 7.6, 7.2$  Hz, 1H), 3.24 (s, 3H), 2.63 (m, 2H), 1.34 (s, 3H).  $^{13}\text{C NMR}$  (101 MHz,  $\text{CDCl}_3$ )  $\delta$  180.3, 144.4, 143.2, 142.5, 139.6, 133.7, 130.0, 128.5, 128.4, 128.2, 128.0, 127.9, 127.9, 127.8, 127.7, 127.2, 127.1, 123.4, 123.1, 122.5, 107.9, 48.5, 38.1, 26.3, 22.8. **HRMS (ESI)** calcd for  $\text{C}_{25}\text{H}_{24}\text{NO}$   $[\text{M}+\text{H}]^+$ : 354.1852, found 354.1850.

**3-(Iodomethyl)-1,3-dimethylindolin-2-one (3a').**  $^1\text{H NMR}$  (400 MHz,  $\text{CDCl}_3$ )  $\delta$  7.33 – 7.32 (m, 1H), 7.28 – 7.16 (m, 1H), 7.11 (td,  $J = 7.6, 0.8$  Hz, 1H), 6.87 (d,  $J = 7.6$  Hz, 1H), 3.52 (d,  $J = 9.6$  Hz, 1H), 3.42 (d,  $J = 9.6$  Hz, 1H), 3.24 (s, 3H), 1.52 (s, 3H).  $^{13}\text{C NMR}$  (101 MHz,  $\text{CDCl}_3$ )  $\delta$  178.0, 143.2, 132.7, 128.7, 122.8, 122.7, 108.3, 48.7, 26.4, 23.0, 10.8. The spectroscopic data match the reported literature<sup>1</sup>.

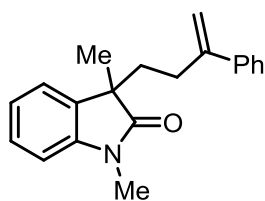

**3w**

**1,3-Dimethyl-3-(3-phenylbut-3-en-1-yl)indolin-2-one (3w).** Following the typical procedure described above, the reaction was carried out by the mixture of **1a** (60.2 mg, 0.2 mmol, 1.0 equiv), prop-1-en-2-ylbenzene (70.9 mg, 0.6 mmol, 3.0 equiv), Pd(OAc)<sub>2</sub> (4.5mg, 0.02 mmol, 10 mol%), DPEPhos (21.5 mg, 0.04 mmol, 20 mol%) and *t*-BuOLi (32.0 mg, 0.4 mmol, 2.0 equiv) in 1,4-dioxane (3.0 mL) at room temperature in nitrogen atmosphere under the irradiation of blue LED lamps for 20 hours. Column chromatography on silica gel (EtOAc/Petroleum ether = 1:10) afforded the title product in 73% isolated yield (42.4 mg) as a colorless oil; *R*<sub>f</sub> = 0.5 (Hexane: Ethyl acetate = 10:1). **<sup>1</sup>H NMR (400 MHz, CDCl<sub>3</sub>)** δ 7.31 – 7.21 (m, 6H), 7.15 (dd, *J* = 7.2, 1.2 Hz, 1H), 7.11 – 7.04 (m, 1H), 6.86 (d, *J* = 7.6 Hz, 1H), 5.18 (d, *J* = 1.2 Hz, 1H), 4.94 (d, *J* = 1.2 Hz, 1H), 3.23 (s, 3H), 2.24 – 2.17 (m, 1H), 2.13 – 1.98 (m, 2H), 1.92 – 1.83 (m, 1H), 1.34 (s, 3H). **<sup>13</sup>C NMR (101 MHz, CDCl<sub>3</sub>)** δ 180.4, 147.6, 143.4, 140.6, 133.8, 128.3, 127.9, 127.4, 126.0, 122.6, 122.5, 112.6, 108.1, 48.3, 37.2, 30.3, 26.2, 23.9. **HRMS (ESI)** calcd for C<sub>20</sub>H<sub>22</sub>NO [M+H]<sup>+</sup>: 292.1696, found 292.1694.

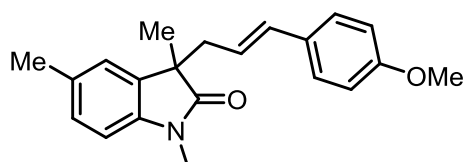

**4a**

**(*E*)-3-(3-(4-methoxyphenyl)allyl)-1,3,5-trimethylindolin-2-one (4a).** Following the typical procedure described above, the reaction was carried out by the mixture of **1b** (63.0 mg, 0.2 mmol, 1.0 equiv), 1-methoxy-4-vinylbenzene (80.6 mg, 0.6 mmol, 3.0 equiv), Pd(OAc)<sub>2</sub> (4.5 mg, 0.02 mmol, 10 mol%), DPEPhos (21.5 mg, 0.04 mmol, 20 mol%) and *t*-BuOLi (32.0 mg, 0.4 mmol, 2.0 equiv) in 1,4-dioxane (3.0 mL) at room temperature in nitrogen atmosphere under the irradiation of blue LED lamps for 20 hours. Column chromatography on silica gel (EtOAc/Petroleum ether = 1:10) afforded the title product in 95% isolated yield (56.2 mg) and *E/Z* > 20:1 as a colorless oil; *R*<sub>f</sub> = 0.5 (Hexane: Ethyl acetate = 10:1). **<sup>1</sup>H NMR (400 MHz, CDCl<sub>3</sub>)** δ 7.14 – 7.03 (m, 4H), 6.79 – 6.69 (m, 3H), 6.29 (dd, *J* = 15.6, 1.2 Hz, 1H), 5.76 – 5.68 (m, 1H), 3.77 (s, 3H), 3.15 (s, 3H), 2.61 – 2.60 (m, 2H), 2.35 (s, 3H), 1.39 (s, 3H). **<sup>13</sup>C NMR (101 MHz, CDCl<sub>3</sub>)** δ 180.3, 158.9, 140.8, 133.8, 132.9, 131.8, 130.2, 128.0, 127.3, 123.8, 122.1, 113.8, 107.7, 55.3, 48.8, 41.7, 26.2, 22.6, 21.2. **HRMS (ESI)** calcd for C<sub>21</sub>H<sub>23</sub>NO<sub>2</sub>Na [M+Na]<sup>+</sup>: 344.1621, found 344.1621.

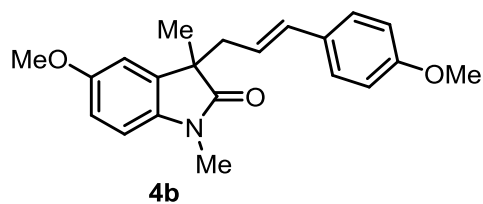

**(E)-5-methoxy-3-(3-(4-methoxyphenyl)allyl)-1,3-dimethylindolin-2-one (4b).** Following the typical procedure described above, the reaction was carried out by the mixture of **1c** (66.2 mg, 0.2 mmol, 1.0 equiv), 1-methoxy-4-vinylbenzene (80.6 mg, 0.6 mmol, 3.0 equiv), Pd(OAc)<sub>2</sub> (4.5 mg, 0.02 mmol, 10 mol%), DPEPhos (21.6 mg, 0.04 mmol, 20 mol%) and *t*-BuOLi (32.0 mg, 0.4 mmol, 2.0 equiv) in 1,4-dioxane (3.0 mL) at room temperature in nitrogen atmosphere under the irradiation of blue LED lamps for 20 hours. Column chromatography on silica gel (EtOAc/Petroleum ether = 1:10) afforded the title product in 91% isolated yield (61.2 mg) and *E* only as a colorless oil;  $R_f = 0.5$  (Hexane: Ethyl acetate = 10:1). <sup>1</sup>H NMR (400 MHz, CDCl<sub>3</sub>) δ 7.15 – 7.12 (m, 2H), 6.85 (d, *J* = 2.4 Hz, 1H), 6.78 (dd, *J* = 8.4, 3.2 Hz, 3H), 6.71 (d, *J* = 8.4 Hz, 1H), 6.30 (d, *J* = 15.6 Hz, 1H), 5.73 (dt, *J* = 15.6, 7.6 Hz, 1H), 3.79 (s, 3H), 3.77 (s, 3H), 3.15 (s, 3H), 2.62 (dd, *J* = 7.6, 1.2 Hz, 2H), 1.40 (s, 3H). <sup>13</sup>C NMR (101 MHz, CDCl<sub>3</sub>) δ 179.9, 158.9, 155.9, 136.7, 135.1, 133.1, 160.2, 127.3, 121.9, 113.8, 111.7, 110.7, 108.2, 55.8, 55.3, 49.2, 41.7, 26.2, 22.6. HRMS (ESI) calcd for C<sub>21</sub>H<sub>24</sub>NO<sub>3</sub> [M+H]<sup>+</sup>: 338.1751, found 338.1748.

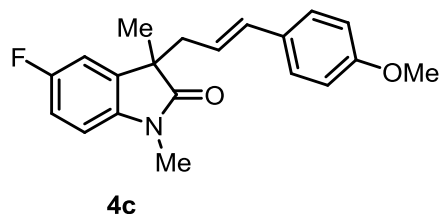

**(E)-5-fluoro-3-(3-(4-methoxyphenyl)allyl)-1,3-dimethylindolin-2-one (4c).** Following the typical procedure described above, the reaction was carried out by the mixture of **1d** (73.8 mg, 0.2 mmol, 1.0 equiv), 1-methoxy-4-vinylbenzene (80.6 mg, 0.6 mmol, 3.0 equiv), Pd(OAc)<sub>2</sub> (4.5 mg, 0.02 mmol, 10 mol%), DPEPhos (21.5 mg, 0.04 mmol, 20 mol%) and *t*-BuOLi (32.0 mg, 0.4 mmol, 2.0 equiv) in 1,4-dioxane (3.0 mL) at room temperature in nitrogen atmosphere under the irradiation of blue LED lamps for 20 hours. Column chromatography on silica gel (EtOAc/Petroleum ether = 1:10) afforded the title product in 96% isolated yield (57.1 mg) and *E* only as a colorless oil;  $R_f = 0.5$  (Hexane: Ethyl acetate = 10:1). <sup>1</sup>H NMR (400 MHz, CDCl<sub>3</sub>) δ 7.15 – 7.11 (m, 2H), 6.96 (ddt, *J* = 9.2, 8.4, 2.4 Hz, 2H), 6.80 – 6.70 (m, 3H), 6.29 (d, *J* = 15.6 Hz, 1H), 5.70 (dt, *J* = 15.6, 7.6 Hz, 1H), 3.77 (s, 3H), 3.16 (s, 3H), 2.63 – 2.61 (m, 2H), 1.40 (s, 3H). <sup>13</sup>C NMR (101 MHz, CDCl<sub>3</sub>) δ 179.9, 159.3(d, <sup>1</sup>*J*<sub>C-F</sub> = 241.1 Hz), 158.0, 139.1(d, <sup>4</sup>*J*<sub>C-F</sub> = 2.0 Hz), 135.4(d, <sup>3</sup>*J*<sub>C-F</sub> = 7.8 Hz), 133.3, 129.8, 127.3, 121.3, 114.0(d, <sup>2</sup>*J*<sub>C-F</sub> = 23.5 Hz), 113.8, 111.2(d, <sup>2</sup>*J*<sub>C-F</sub> = 24.6 Hz), 108.4(d, <sup>3</sup>*J*<sub>C-F</sub> = 8.2 Hz), 55.2, 49.2, 41.5, 26.2, 22.4. <sup>19</sup>F NMR (376 MHz, CDCl<sub>3</sub>) δ -

120.8. **HRMS (ESI)** calcd for  $C_{20}H_{21}FNO_2$   $[M+H]^+$ : 326.1551, found 326.1545.

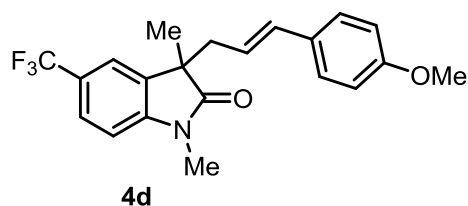

**(E)-3-(3-(4-methoxyphenyl)allyl)-1,3-dimethyl-5-(trifluoromethyl)indolin-2-one (4d).** Following the typical procedure described above, the reaction was carried out by the mixture of **1e** (73.8 mg, 0.2 mmol, 1.0 equiv), 1-methoxy-4-vinylbenzene (80.6 mg, 0.6 mmol, 3.0 equiv), Pd(OAc)<sub>2</sub> (4.5 mg, 0.02 mmol, 10 mol%), DPEPhos (21.5 mg, 0.04 mmol, 20 mol%) and *t*-BuOLi (32.0 mg, 0.4 mmol, 2.0 equiv) in 1,4-dioxane (3.0 mL) at room temperature in nitrogen atmosphere under the irradiation of blue LED lamps for 20 hours. Column chromatography on silica gel (EtOAc/Petroleum ether = 1:10) afforded the title product in 93% isolated yield (70.4 mg) and *E* only as a colorless oil;  $R_f$  = 0.5 (Hexane: Ethyl acetate = 10:1). **<sup>1</sup>H NMR (400 MHz, CDCl<sub>3</sub>)**  $\delta$  7.56 – 7.54 (m, 1H), 7.45 (d,  $J$  = 1.6 Hz, 1H), 7.14 – 7.11 (m, 2H), 6.87 (d,  $J$  = 8.4 Hz, 1H), 6.80 – 6.76 (m, 2H), 6.28 (d,  $J$  = 15.6 Hz, 1H), 5.67 (dt,  $J$  = 15.6, 7.6 Hz, 1H), 3.77 (s, 3H), 3.20 (s, 3H), 2.65 (dd,  $J$  = 7.6, 1.2 Hz, 2H), 1.44 (s, 3H). **<sup>13</sup>C NMR (101 MHz, CDCl<sub>3</sub>)**  $\delta$  180.2, 159.1, 146.2, 134.3, 133.8, 129.8, 127.3, 127.2(q,  $^1J_{C-F}$  = 272.1 Hz), 125.7(q,  $^3J_{C-F}$  = 4.1 Hz), 124.6(q,  $^2J_{C-F}$  = 32.5 Hz), 121.0, 120.0(q,  $^3J_{C-F}$  = 3.8 Hz), 113.9, 107.7, 55.2, 48.8, 41.6, 26.3, 22.4. **<sup>19</sup>F NMR (376 MHz, CDCl<sub>3</sub>)**  $\delta$  -61.3. **HRMS (ESI)** calcd for  $C_{21}H_{21}F_3NO_2$   $[M+H]^+$ : 376.1519, found 376.1513.

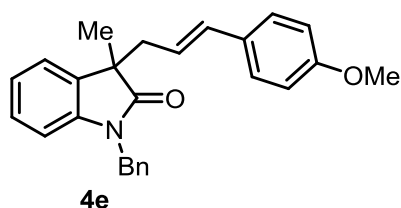

**(E)-1-benzyl-3-(3-(4-methoxyphenyl)allyl)-3-methylindolin-2-one (4e).** Following the typical procedure described above, the reaction was carried out by the mixture of **1f** (63.0 mg, 0.2 mmol, 1.0 equiv), 1-methoxy-4-vinylbenzene (80.6 mg, 0.6 mmol, 3.0 equiv), Pd(OAc)<sub>2</sub> (4.5 mg, 0.02 mmol, 10 mol%), DPEPhos (21.5 mg, 0.04 mmol, 20 mol%) and *t*-BuOLi (32.0 mg, 0.4 mmol, 2.0 equiv) in 1,4-dioxane (3.0 mL) at room temperature in nitrogen atmosphere under the irradiation of blue LED lamps for 20 hours. Column chromatography on silica gel (EtOAc/Petroleum ether = 1:10) afforded the title product in 98% isolated yield (77.0 mg) and *E* only as a colorless oil;  $R_f$  = 0.5 (Hexane: Ethyl acetate = 10:1). **<sup>1</sup>H NMR (400 MHz, CDCl<sub>3</sub>)**  $\delta$  7.27 – 7.22 (m, 1H), 7.15 – 6.97 (m, 9H), 6.79 – 6.75 (m, 2H), 6.63 (d,  $J$  = 7.6 Hz, 1H), 6.35 (d,  $J$  = 15.6 Hz, 1H), 5.66 (ddd,  $J$  = 15.6, 8.4, 6.4 Hz, 1H), 5.17 (d,  $J$  = 15.6 Hz, 1H), 4.59 (d,  $J$  = 15.6 Hz, 1H), 3.78 (s, 3H), 2.75 (qdd,  $J$  = 13.2, 7.6, 1.2 Hz, 2H), 1.48 (s, 3H). **<sup>13</sup>C NMR (101**

**MHz, CDCl<sub>3</sub>**)  $\delta$  180.2, 158.9, 142.2, 135.6, 133.4, 133.1, 129.9, 128.6, 127.7, 127.3, 127.2, 126.9, 122.8, 122.4, 121.8, 113.8, 109.1, 55.2, 48.9, 43.6, 41.9, 23.3. **HRMS (ESI)** calcd for C<sub>26</sub>H<sub>26</sub>NO<sub>2</sub> [M+H]<sup>+</sup>: 384.1964, found 384.1956.

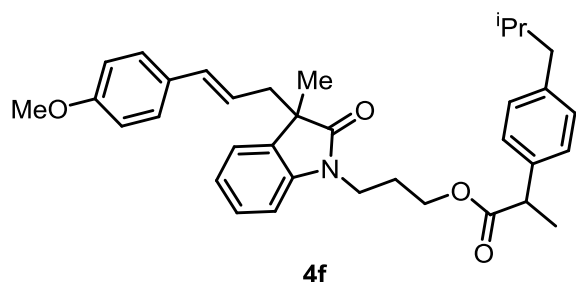

**(E)-3-(3-(3-(4-methoxyphenyl)allyl)-3-methyl-2-oxindolin-1-yl)propyl 2-(4-isobutylphenyl)propanoate (4f)**. Following the typical procedure described above, the reaction was carried out by the mixture of **1g** (106.6 mg, 0.2 mmol, 1.0 equiv), 1-methoxy-4-vinylbenzene (80.5 mg, 0.6 mmol, 3.0 equiv), Pd(OAc)<sub>2</sub> (4.5mg, 0.02 mmol, 10 mol%), DPEPhos (21.5 mg, 0.04 mmol, 20 mol%) and *t*-BuOLi (32.0 mg, 0.4 mmol, 2.0 equiv) in 1,4-dioxane (3.0 mL) at room temperature in nitrogen atmosphere under the irradiation of blue LED lamps for 20 hours. Column chromatography on silica gel (EtOAc/Petroleum ether = 1:5) afforded the title product in 80% isolated yield (85.1 mg) and *E* only as a colorless oil;  $R_f$  = 0.5 (Hexane: Ethyl acetate = 5:1). **<sup>1</sup>H NMR (400 MHz, CDCl<sub>3</sub>)**  $\delta$  7.23 (dt,  $J$  = 10.4, 3.2 Hz, 3H), 7.16 – 7.01 (m, 6H), 6.77 – 6.74 (m, 2H), 6.52 (dd,  $J$  = 13.2, 7.6 Hz, 1H), 6.26 (dd,  $J$  = 15.6, 2.0 Hz, 1H), 5.62 (dt,  $J$  = 15.6, 7.6 Hz, 1H), 3.91 (dtd,  $J$  = 15.6, 11.6, 6.0 Hz, 2H), 3.75 (d,  $J$  = 0.8 Hz, 3H), 3.69 (ddt,  $J$  = 10.4, 7.2, 5.2 Hz, 2H), 3.47 (dtd,  $J$  = 14.4, 7.2, 3.2 Hz, 1H), 2.61 (d,  $J$  = 7.6 Hz, 2H), 2.43 (dd,  $J$  = 7.2, 2.4 Hz, 2H), 1.84 – 1.78 (m, 3H), 1.50 (dd,  $J$  = 7.2, 2.4 Hz, 3H), 1.38 (s, 3H), 0.86 (dd,  $J$  = 6.4, 3.2 Hz, 6H). **<sup>13</sup>C NMR (101 MHz, CDCl<sub>3</sub>)**  $\delta$  180.2, 174.5, 158.9, 142.4, 140.7, 137.8, 137.7, 133.6, 133.2, 129.9, 129.4, 127.8, 127.2, 123.0, 122.3, 121.7, 113.8, 107.9, 61.8, 55.3, 48.7, 45.2, 45.1, 45.0, 41.9, 36.4, 30.2, 26.9, 22.6, 22.4, 18.4. **HRMS (ESI)** calcd for C<sub>35</sub>H<sub>42</sub>NO<sub>4</sub> [M+H]<sup>+</sup>: 540.3108, found 540.3101.

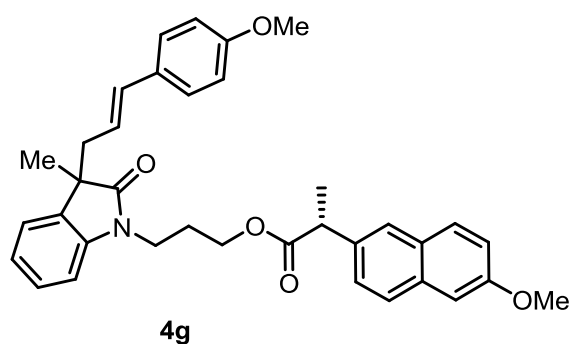

**3-(3-((E)-3-(4-methoxyphenyl)allyl)-3-methyl-2-oxindolin-1-yl)propyl (2R)-2-(6-methoxynaphthalen-2-yl)propanoate (4g)**. Following the typical procedure described above, the reaction was carried out by the mixture of **1h** (111.4 mg, 0.2 mmol, 1.0 equiv), 1-methoxy-4-vinylbenzene (80.5 mg, 0.6 mmol,

3.0 equiv), Pd<sub>2</sub>(dba)<sub>3</sub> (18.3 mg, 0.02 mmol, 10 mol%), DPEPhos (21.5 mg, 0.04 mmol, 20 mol%) and *t*-BuOLi (32.0 mg, 0.4 mmol, 2.0 equiv) in 1,4-dioxane (3.0 mL) at room temperature in nitrogen atmosphere under the irradiation of blue LED lamps for 20 hours. Column chromatography on silica gel (EtOAc/Petroleum ether = 1:5) afforded the title product in 74% isolated yield (83.4 mg) and *E* only as a colorless oil; *R*<sub>f</sub> = 0.5 (Hexane: Ethyl acetate = 10:1). **<sup>1</sup>H NMR (400 MHz, CDCl<sub>3</sub>)** δ 7.73 – 7.69 (m, 3H), 7.43 (m, 1H), 7.23 – 7.05 (m, 6H), 7.02 – 6.871(m, 2H), 6.75 (m, 2H), 6.36 (dd, *J* = 14.4, 7.6 Hz, 1H), 6.25 (d, *J* = 15.6, 1H), 5.60 (dt, *J* = 15.6, 7.6 Hz, 1H), 4.01 – 3.94 (m, 1H), 3.90 (s, 3H), 3.87 – 3.82 (m, 3.6 Hz, 1H), 3.75 (s, 3H), 3.69 (dt, *J* = 14.4, 7.0 Hz, 1H), 3.52 – 3.43 (m, *J* = 14.4, 1H), 2.60 (d, *J* = 7.6 Hz, 2H), 1.81 – 1.77 (m, 2H), 1.58 (dd, *J* = 7.2, 2.8 Hz, 3H), 1.36 (s, 3H). **<sup>13</sup>C NMR (101 MHz, CDCl<sub>3</sub>)** δ 180.2, 174.4, 158.9, 157.7, 142.3, 135.7, 133.8, 133.5, 133.2, 129.9, 129.3, 129.0, 127.8, 127.3, 127.2, 126.2, 126.0, 123.0, 122.2, 121.7, 119.1, 113.8, 107.8, 105.6, 61.8, 55.3, 55.3, 48.7, 45.4, 41.9, 36.5, 26.9, 22.6, 18.4. **HRMS (ESI)** calcd for C<sub>36</sub>H<sub>38</sub>NO<sub>5</sub> [M+H]<sup>+</sup>: 564.2744, found 564.2749.

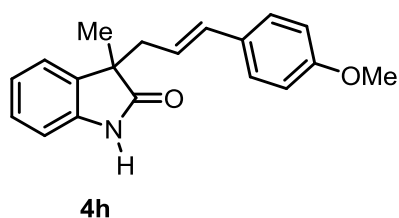

**(*E*)-3-(3-(4-methoxyphenyl)allyl)-3-methylindolin-2-one (4h).** Following the typical procedure described above, the reaction was carried out by the mixture of **1j** (57.4 mg, 0.2 mmol, 1.0 equiv), 1-methoxy-4-vinylbenzene (80.6 mg, 0.6 mmol, 3.0 equiv), Pd(OAc)<sub>2</sub> (4.5 mg, 0.01 mmol, 10 mol%), DPEPhos (21.5 mg, 0.04 mmol, 20 mol%) and *t*-BuOLi (32.0 mg, 0.4 mmol, 2.0 equiv) in 1,4-dioxane (3.0 mL) at room temperature in nitrogen atmosphere under the irradiation of blue LED lamps for 20 hours. Column chromatography on silica gel (EtOAc/Petroleum ether = 1:15) afforded the title product in 53% isolated yield (30.8 mg) and *E/Z* = 7:1 as a colorless oil; *R*<sub>f</sub> = 0.5 (Hexane: Ethyl acetate = 15:1). **<sup>1</sup>H NMR (400 MHz, CDCl<sub>3</sub>)** δ 8.19 (s, 1H), 7.19 (t, *J* = 7.6 Hz, 2H), 7.13 – 7.11 (m, 2H), 7.06 – 7.02 (m, 1H), 6.87 (dt, *J* = 7.6, 1.2 Hz, 1H), 6.78 – 6.74 (m, 2H), 6.30 (d, *J* = 15.6 Hz, 1H), 5.77 (dt, *J* = 15.6, 7.6 Hz, 1H), 3.76 (s, 3H), 2.65 – 2.63 (m, 2H), 1.43 (s, 3H). **<sup>13</sup>C NMR (101 MHz, CDCl<sub>3</sub>)** δ 182.4, 159.0, 140.2, 134.1, 133.2, 160.2, 127.8, 127.3, 123.4, 122.4, 121.8, 113.8, 109.7, 55.3, 49.1, 41.7, 22.6. **HRMS (ESI)** calcd for C<sub>19</sub>H<sub>20</sub>NO<sub>2</sub> [M+H]<sup>+</sup>: 294.1489, found 294.1484.

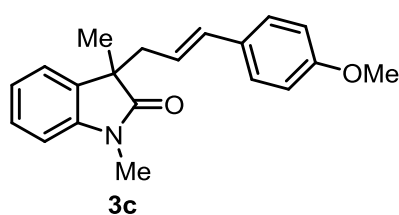

**(E)-3-(3-(4-methoxyphenyl)allyl)-1,3-dimethylindolin-2-one (3c).** Following the typical procedure described above, the reaction was carried out by the mixture of **1a-Br** (50.6 mg, 0.2 mmol, 1.0 equiv), 1-methyl-4-vinylbenzene (98.6 mg, 0.6 mmol, 3.0 equiv), Pd(OAc)<sub>2</sub> (4.5 mg, 0.02 mmol, 10 mol%), DPEPhos (21.5 mg, 0.04 mmol, 20 mol%) and *t*-BuOLi (32.0 mg, 0.4 mmol, 2.0 equiv) in 1,4-dioxane (3.0 mL) at room temperature in nitrogen atmosphere under the irradiation of blue LED lamps for 20 hours. Column chromatography on silica gel (EtOAc/Petroleum ether = 1:10) afforded the title product in 94% isolated yield (57.8 mg) and *E/Z* > 20:1 as a colorless oil; *R<sub>f</sub>* = 0.5 (Hexane: Ethyl acetate = 10:1). <sup>1</sup>H NMR (400 MHz, CDCl<sub>3</sub>) δ 7.28 – 7.21 (m, 2H), 7.14 – 7.12 (m, 2H), 7.06 (td, *J* = 7.6, 1.2 Hz, 1H), 6.82 – 6.72 (m, 3H), 6.28 (d, *J* = 15.6 Hz, 1H), 5.74 (ddd, *J* = 15.6, 8.0, 7.6 Hz, 1H), 3.76 (s, 3H), 3.17 (s, 3H), 2.67 – 2.57 (m, 2H), 1.41 (s, 3H). <sup>13</sup>C NMR (101 MHz, CDCl<sub>3</sub>) δ 180.2, 158.8, 143.1, 133.6, 133.0, 130.0, 127.7, 127.2, 122.9, 122.3, 121.9, 113.7, 107.9, 55.2, 48.6, 41.6, 26.1, 22.4. The spectroscopic data match the reported literature<sup>9</sup>.

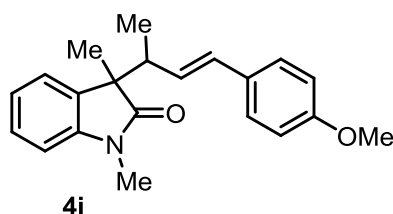

**(E)-3-(4-(4-methoxyphenyl)but-3-en-2-yl)-1,3-dimethylindolin-2-one (4i).** Following the typical procedure described above, the reaction was carried out by the mixture of **5** (63.0 mg, 0.2 mmol, 1.0 equiv), 1-methoxy-4-vinylbenzene (80.6 mg, 0.6 mmol, 3.0 equiv), Pd(OAc)<sub>2</sub> (4.5 mg, 0.02 mmol, 10 mol%), DPEPhos (21.5 mg, 0.04 mmol, 20 mol%) and *t*-BuOLi (32.0 mg, 0.4 mmol, 2.0 equiv) in 1,4-dioxane (3.0 mL) at room temperature in nitrogen atmosphere under the irradiation of blue LED lamps for 20 hours. Column chromatography on silica gel (EtOAc/Petroleum ether = 1:10) afforded the title product **5** in 67% isolated yield (42.4 mg) and *E/Z* = 7:1 and *d.r.* = 1.4:1 as a colorless oil; and byproduct **6** in 25% isolated yield (12.6 mg). *R<sub>f</sub>* = 0.5 (Hexane: Ethyl acetate = 10:1). <sup>1</sup>H NMR (400 MHz, CDCl<sub>3</sub>) δ 7.35 – 7.15 (m, 4H), 7.11 – 7.01 (m, 1H), 6.89 – 6.75 (m, 3H), 6.51 – 6.26 (m, 1H), 6.14 – 5.82 (m, 1H), 3.83 – 3.75 (m, 3H), 3.41 – 3.11 (m, 3H), 2.75 – 2.68 (m, 1H), 1.38 (s, 3H), 0.89 (m, 3H). <sup>13</sup>C NMR (101 MHz, CDCl<sub>3</sub>, major) δ 180.2, 158.8, 143.6, 132.2, 130.2, 129.8, 128.1, 127.4, 127.3, 122.2, 114.0, 113.8, 107.8, 55.3, 51.8, 45.4, 26.0, 21.4, 15.7. <sup>13</sup>C NMR (101 MHz, CDCl<sub>3</sub>, minor) δ 180.6, 159.1, 143.47, 132.1, 131.4, 130.3, 130.2, 129.9, 127.8, 123.9, 123.1, 114.6, 107.9, 55.4, 51.8, 44.2, 26.1, 22.3, 15.5. HRMS (ESI) calcd for C<sub>21</sub>H<sub>24</sub>NO<sub>2</sub> [M+H]<sup>+</sup>: 322.1802, found 322.1799.

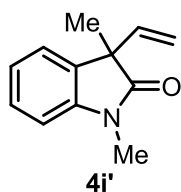

**1,3-Dimethyl-3-vinyloindolin-2-one (4i')**. Column chromatography on silica gel (EtOAc/Petroleum ether = 1:10) afforded the title product **4i'** in 25% isolated yield (12.6 mg) as a colorless oil.  $R_f = 0.5$  (Hexane: Ethyl acetate = 10:1).  $^1\text{H NMR}$  (400 MHz,  $\text{CDCl}_3$ )  $\delta$  7.32 – 7.26 (m, 1H), 7.20 (d,  $J = 7.2$  Hz, 1H), 7.09 (t,  $J = 7.6$  Hz, 1H), 6.87 (d,  $J = 7.6$  Hz, 1H), 5.95 (dd,  $J = 17.2, 10.4$  Hz, 1H), 5.17 – 5.11 (m, 2H), 3.22 (s, 3H), 1.50 (s, 3H).  $^{13}\text{C NMR}$  (101 MHz,  $\text{CDCl}_3$ )  $\delta$  178.7, 143.0, 138.1, 132.7, 128.1, 123.8, 122.5, 115.3, 108.2, 51.2, 26.3, 22.4. The spectroscopic data match the reported literature<sup>9</sup>.

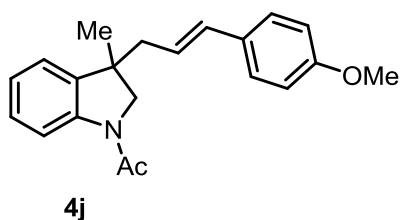

**(E)-1-(3-(3-(4-methoxyphenyl)allyl)-3-methylindolin-1-yl)ethan-1-one (4j)**. Following the typical procedure described above, the reaction was carried out by the mixture of **6** (63.1 mg, 0.2 mmol, 1.0 equiv), 1-methoxy-4-vinylbenzene (80.5 mg, 0.6 mmol, 3.0 equiv),  $\text{Pd}(\text{OAc})_2$  (4.5 mg, 0.02 mmol, 10 mol%), DPEPhos (21.5 mg, 0.04 mmol, 20 mol%) and *t*-BuOLi (32.0 mg, 0.4 mmol, 2.0 equiv) in 1,4-dioxane (3.0 mL) at room temperature in nitrogen atmosphere under the irradiation of blue LED lamps for 20 hours. Column chromatography on silica gel (EtOAc/Petroleum ether = 1:10) afforded the title product in 67% isolated yield (42.5 mg) and *E* only as a colorless oil;  $R_f = 0.5$  (Hexane: Ethyl acetate = 10:1).  $^1\text{H NMR}$  (400 MHz,  $\text{CDCl}_3$ )  $\delta$  8.20 (d,  $J = 8.0$  Hz, 1H), 7.25 – 7.13 (m, 4H), 7.06 (td,  $J = 7.6, 1.2$  Hz, 1H), 6.87 – 6.79 (m, 2H), 6.37 (d,  $J = 15.6$  Hz, 1H), 5.87 (dt,  $J = 15.6, 7.6$  Hz, 1H), 3.94 (d,  $J = 10.4$  Hz, 1H), 3.78 (s, 3H), 3.65 (d,  $J = 10.4$  Hz, 1H), 2.17 (s, 3H), 1.40 (s, 3H).  $^{13}\text{C NMR}$  (101 MHz,  $\text{CDCl}_3$ )  $\delta$  163.4, 153.8, 136.8, 133.6, 127.8, 124.6, 122.7, 122.0, 118.5, 117.8, 117.1, 111.7, 108.7, 55.5, 50.0, 39.8, 38.7, 21.0, 19.0. **HRMS (ESI)** calcd for  $\text{C}_{21}\text{H}_{23}\text{NO}_2\text{Na}$   $[\text{M}+\text{Na}]^+$ : 344.1621, found 344.1622.

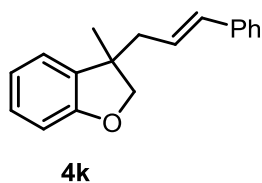

**3-Cinnamyl-3-methyl-2,3-dihydrobenzofuran (4k)**. Following the typical procedure described above, the reaction was carried out by the mixture of **7** (54.8 mg, 0.2 mmol, 1.0 equiv), styrene (62.4 mg, 0.6 mmol, 3.0 equiv),  $\text{Pd}(\text{OAc})_2$  (4.5 mg, 0.02 mmol, 10 mol%), DPEPhos (21.6 mg, 0.04 mmol, 20 mol%)



and  $\text{Cs}_2\text{CO}_3$  (130.4 mg, 0.4 mmol, 2.0 equiv) in 1,4-dioxane (3.0 mL) at room temperature in nitrogen atmosphere under the irradiation of blue LED lamps for 20 hours. Column chromatography on silica gel (EtOAc/Petroleum ether = 1:10) afforded the title product in 74% isolated yield (37.0 mg) as a colorless oil;  $R_f = 0.5$  (Hexane: Ethyl acetate = 10:1).  **$^1\text{H NMR}$  (400 MHz,  $\text{CDCl}_3$ )**  $\delta$  7.33 – 7.24 (m, 4H), 7.21 (dh,  $J = 8.4, 2.4, 2.0$  Hz, 1H), 7.17 – 7.11 (m, 2H), 6.89 (td,  $J = 7.6, 1.2$  Hz, 1H), 6.80 (d,  $J = 8.0$  Hz, 1H), 6.41 (dt,  $J = 15.6, 1.6$  Hz, 1H), 6.11 (ddd,  $J = 15.6, 8.0, 6.8$  Hz, 1H), 4.44 (dd,  $J = 8.8, 1.2$  Hz, 1H), 4.15 (dd,  $J = 8.8, 1.2$  Hz, 1H), 2.51 (dd,  $J = 7.6, 1.2$  Hz, 2H), 1.40 (s, 3H).  **$^{13}\text{C NMR}$  (101 MHz,  $\text{CDCl}_3$ )**  $\delta$  159.5, 137.3, 134.9, 133.5, 128.5, 128.2, 127.3, 126.2, 125.7, 123.0, 120.5, 109.7, 82.0, 45.7, 44.3, 25.0. The spectroscopic data match the reported literature<sup>11</sup>.

## Grams Scale Synthesis

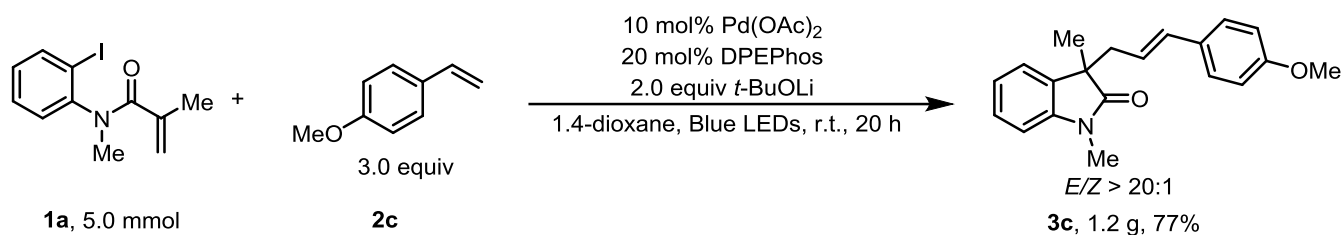

An oven-dried 75 mL reaction flask was charged with amide **1a** (1.51 g, 5.0 mol, 1.0 equiv.), 1-methoxy-4-vinylbenzene **2c** (2.01 g, 15.0 mmol, 3.0 equiv.), Pd(OAc)<sub>2</sub> (112 mg, 0.5 mmol, 10 mol%), DPEPhos (538mg, 1.0 mmol, 20%) and *t*-BuOLi (800 mg, 10.0 mmol, 2.0 equiv.). It was directly transferred in a nitrogen-filled glovebox with caps. In the glovebox, 75 mL of degassed 1,4-dioxane were added to the vial. The vial was tightly sealed, transferred out of glovebox and stirred at room temperature under the irradiation of blue LED lamps for 20 hours. After completion of the reaction, the resulting mixture was diluted with acetone (100 mL), filtered (Celite), and concentrated under a reduced pressure. The residue was purified by column chromatography on silica gel (EtOAc/Petroleum ether = 1:10) to afford **3c** in 77% isolated yield (1.2 g).

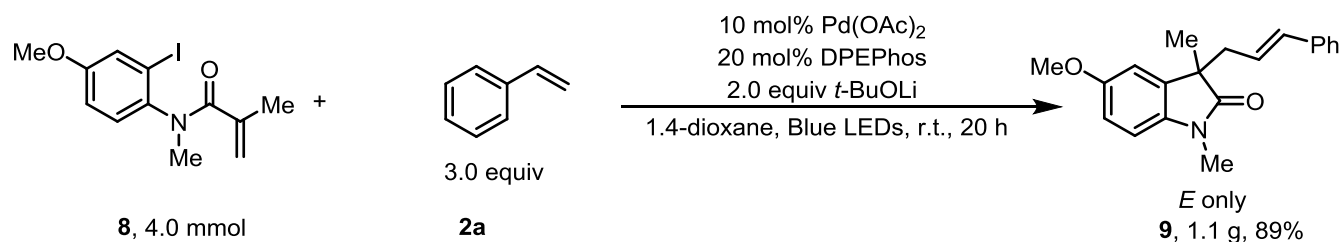

An oven-dried 60 mL reaction flask was charged with amide **8** (1.32 g, 4.0 mol, 1.0 equiv.), styrene **2a** (1.2 g, 12.0 mmol, 3.0 equiv.), Pd(OAc)<sub>2</sub> (90 mg, 0.4 mmol, 10 mol%), DPEPhos (430mg, 0.8 mmol, 20%) and *t*-BuOLi (640 mg, 8.0 mmol, 2.0 equiv.). It was directly transferred in a nitrogen-filled glovebox with caps. In the glovebox, 60 mL of degassed 1,4-dioxane were added to the vial. The vial was tightly sealed, transferred out of glovebox and stirred at room temperature under the irradiation of blue LED lamps for 20 hours. After completion of the reaction, the resulting mixture was diluted with acetone (100 mL), filtered (Celite), and concentrated under a reduced pressure. The residue was purified by column chromatography on silica gel (EtOAc/Petroleum ether = 1:10) to afford **9** in 89% isolated yield (1.1 g).

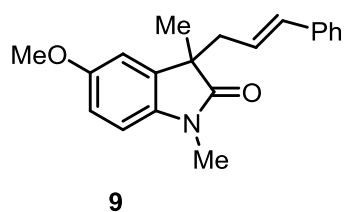

**3-cinnamyl-5-methoxy-1,3-dimethylindolin-2-one (9)**. **9** was isolated in 89% yield and *E* only as a

yellow oil;  $R_f = 0.5$  (Hexane: Ethyl acetate = 10:1).  $^1\text{H NMR}$  (400 MHz,  $\text{CDCl}_3$ )  $\delta$  7.25 – 7.14 (m, 5H), 6.85 (d,  $J = 2.4$  Hz, 1H), 6.79 – 6.70 (m, 2H), 6.35 (d,  $J = 15.6$  Hz, 1H), 5.87 (dt,  $J = 15.6, 7.6$  Hz, 1H), 3.78 (s, 3H), 3.15 (s, 3H), 2.64 (dd,  $J = 7.6, 1.2$  Hz, 2H), 1.40 (s, 3H).  $^{13}\text{C NMR}$  (101 MHz,  $\text{CDCl}_3$ )  $\delta$  179.8, 155.9, 137.2, 136.7, 134.9, 133.6, 128.3, 127.1, 126.1, 124.1, 111.7, 110.6, 108.1, 55.8, 49.0, 41.6, 26.2, 22.6. The spectroscopic data match the reported literature<sup>12</sup>.

## Experimental Procedures for the Mechanistic Studies

### The Radical Trapping Experiment with TEMPO

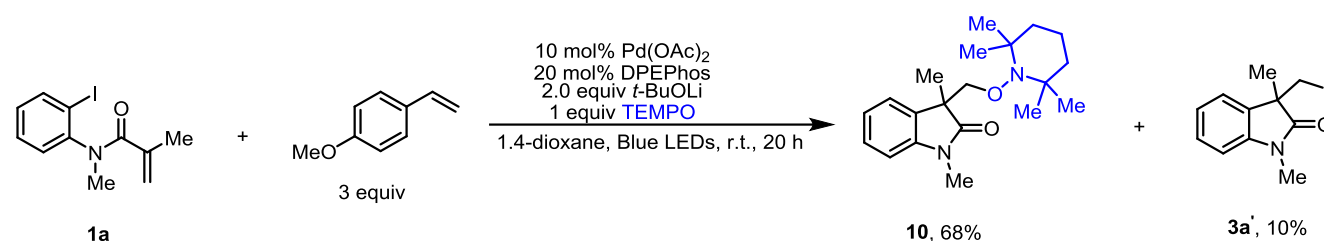

An oven-dried 4.0 mL vial was charged with amide **1a** (60.2mg, 0.2 mmol, 1.0 equiv.), 1-methoxy-4-vinylbenzene **2c** (80.5 mg, 0.6 mmol, 3.0 equiv.),  $\text{Pd}(\text{OAc})_2$  (4.5 mg, 0.02 mmol, 10 mol%), DPEPhos (21.5 mg, 0.04 mmol, 20 mol%), TEMPO (31.25 mg, 0.2 mmol, 1.0 equiv.) and  $t\text{-BuOLi}$  (32.0 mg, 0.4 mmol, 2.0 equiv.). It was directly transferred in a nitrogen-filled glovebox with caps. In the glovebox, 3 mL of degassed 1,4-dioxane were added to the vial. The vial was tightly sealed, transferred out of glovebox and stirred at room temperature under the irradiation of blue LEDs lamps for 20 hours. After completion of the reaction, the resulting mixture was diluted with acetone (5 mL), filtered (Celite), and concentrated under a reduced pressure. The residue was purified by column chromatography on silica gel (EtOAc/Petroleum ether = 1:7) to afford **10** in 68% and **3a'** in 40% as a mixture colorless oil (51.1 mg).

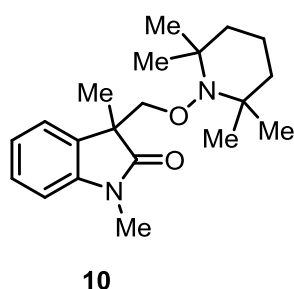

**1,3-dimethyl-3-(((2,2,6,6-tetramethylpiperidin-1-yl)oxy)methyl)indolin-2-one (10).**  $^1\text{H NMR}$  (400 MHz,  $\text{CDCl}_3$ )  $\delta$  7.32 – 7.25 (m, 2H), 7.06 (t,  $J = 7.2$  Hz, 1H), 6.84 (d,  $J = 7.6$  Hz, 1H), 4.03 – 3.96 (m, 2H), 3.23 (s, 3H), 1.40 – 1.22 (m, 9H), 1.08 (s, 3H), 0.98 (s, 3H), 0.93 (s, 3H), 0.67 (s, 3H).  $^{13}\text{C NMR}$  (101 MHz,  $\text{CDCl}_3$ )  $\delta$  178.8, 143.6, 132.8, 127.6, 122.8, 121.9, 107.5, 79.6, 60.0, 59.9, 48.8, 39.4, 39.4, 32.6, 32.6, 26.0, 19.8, 19.5, 18.8, 16.8. **HRMS (ESI)** calcd for  $\text{C}_{20}\text{H}_{31}\text{N}_2\text{O}_2$   $[\text{M}+\text{H}]^+$ : 331.2380, found 331.2373.

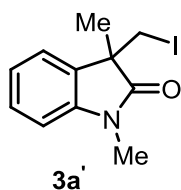

**3-(iodomethyl)-1,3-dimethylindolin-2-one (3a').** Column chromatography on silica gel (EtOAc/Petroleum ether = 1:10) afforded the title product in 98% isolated yield (58.9 mg) as a colorless oil. <sup>1</sup>H NMR (400 MHz, CDCl<sub>3</sub>) δ 7.36 – 7.34 (m, 1H), 7.25 – 7.20 (m, 1H), 7.12 (t, *J* = 7.6 Hz, 1H), 6.89 (d, *J* = 7.6 Hz, 1H), 3.52 (d, *J* = 9.6 Hz, 1H), 3.43 (d, *J* = 9.6 Hz, 1H), 3.25 (s, 3H), 1.52 (s, 3H). <sup>13</sup>C NMR (101 MHz, CDCl<sub>3</sub>) δ 177.8, 143.0, 132.5, 128.5, 122.6, 122.5, 108.2, 48.5, 26.2, 22.8, 10.7. The spectroscopic data match the reported literature<sup>1</sup>.

### Control experiments:

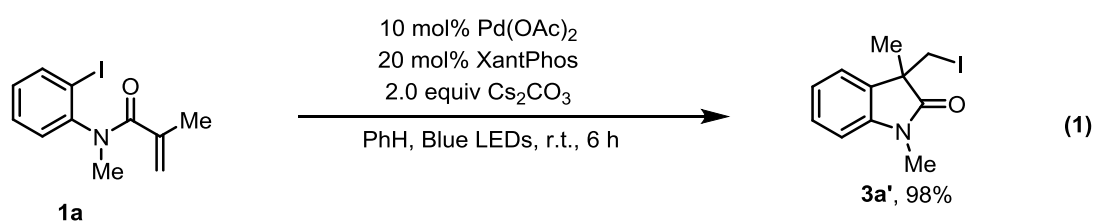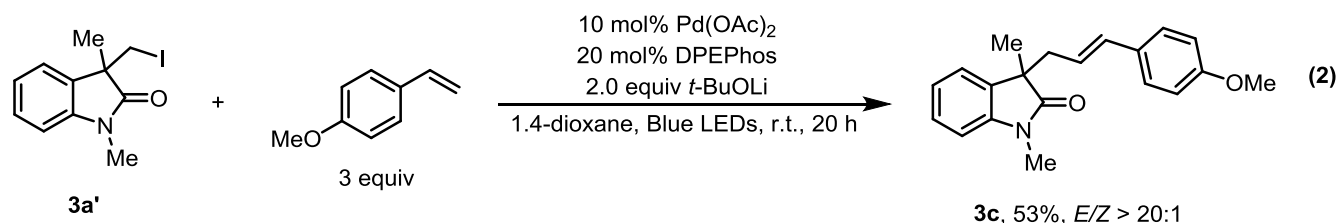

(1) An oven-dried 4.0 mL vial was charged with amide **1a** (60.2mg, 0.2 mmol, 1.0 equiv.), Pd(OAc)<sub>2</sub> (4.5 mg, 0.02 mmol, 10 mol%), XantPhos (23.2 mg, 0.02 mmol, 20 mol%) and Cs<sub>2</sub>CO<sub>3</sub> (130.4 mg, 0.4 mmol, 2.0 equiv.). It was directly transferred in a nitrogen-filled glovebox with caps. In the glovebox, 3 mL of degassed benzene were added to the vial. The vial was tightly sealed, transferred out of glovebox and stirred at room temperature under the irradiation of blue LEDs lamps for 6 hours. After completion of the reaction, the resulting mixture was diluted with acetone (5 mL), filtered (Celite), and concentrated under a reduced pressure. The residue was purified by column chromatography on silica gel (EtOAc/Petroleum ether = 1:10) to afford **3a'** in 98% isolated yield (60.0 mg).

(2) An oven-dried 4.0 mL vial was charged with amide **3a'** (60.0mg, 0.2 mmol, 1.0 equiv.), 1-methoxy-4-vinylbenzene (80.6 mg, 0.6 mmol, 3.0 equiv.) Pd(OAc)<sub>2</sub> (4.5 mg, 0.02 mmol, 10 mol%), DPEPhos (21.5 mg, 0.02 mmol, 20 mol%) and *t*-BuOLi (32.0 mg, 0.4 mmol, 2.0 equiv.). It was directly transferred in a nitrogen-filled glovebox with caps. In the glovebox, 3 mL of degassed 1,4-dioxane were added to the vial. The vial was tightly sealed, transferred out of glovebox and stirred at room

temperature under the irradiation of blue LEDs lamps for 20 hours. After completion of the reaction, the resulting mixture was diluted with acetone (5 mL), filtered (Celite), and concentrated under a reduced pressure. The residue was purified by column chromatography on silica gel (EtOAc/Petroleum ether = 1:10) to afford **3c** in 53% isolated yield (32.0 mg) and *E/Z* > 20:1 as a colorless oil.

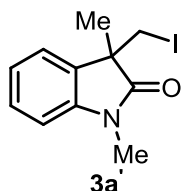

**3-(Iodomethyl)-1,3-dimethylindolin-2-one (3a')**. Column chromatography on silica gel (EtOAc/Petroleum ether = 1:10) afforded the title product in 98% isolated yield (58.9 mg) as a colorless oil. <sup>1</sup>H NMR (400 MHz, CDCl<sub>3</sub>) δ 7.34 (td, *J* = 7.6, 1.2 Hz, 1H), 7.29 – 7.27 (m, 1H), 7.12 (t, *J* = 7.6 Hz, 1H), 6.89 (d, *J* = 7.6 Hz, 1H), 3.52 (d, *J* = 9.6 Hz, 1H), 3.43 (d, *J* = 9.6 Hz, 1H), 3.25 (s, 3H), 1.52 (s, 3H). <sup>13</sup>C NMR (101 MHz, CDCl<sub>3</sub>) δ 177.9, 143.1, 132.6, 128.6, 122.7, 122.6, 108.2, 48.6, 26.3, 22.9, 10.8. The spectroscopic data match the reported literature<sup>1</sup>.

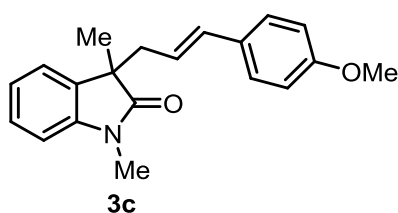

**(E)-3-(3-(4-methoxyphenyl)allyl)-1,3-dimethylindolin-2-one (3c)**. Column chromatography on silica gel (EtOAc/Petroleum ether = 1:10) afforded the title product in 53% isolated yield (32.0 mg) and *E/Z* > 20:1 as a colorless oil; *R<sub>f</sub>* = 0.5 (Hexane: Ethyl acetate = 10:1). <sup>1</sup>H NMR (400 MHz, CDCl<sub>3</sub>) δ 7.28 – 7.21 (m, 2H), 7.14 – 7.12 (m, 2H), 7.06 (td, *J* = 7.6, 1.2 Hz, 1H), 6.82 – 6.72 (m, 3H), 6.28 (d, *J* = 15.6 Hz, 1H), 5.74 (ddd, *J* = 15.6, 8.0, 7.6 Hz, 1H), 3.76 (s, 3H), 3.17 (s, 3H), 2.67 – 2.57 (m, 2H), 1.41 (s, 3H). <sup>13</sup>C NMR (101 MHz, CDCl<sub>3</sub>) δ 180.2, 158.8, 143.1, 133.6, 133.0, 130.0, 127.7, 127.2, 122.9, 122.3, 121.9, 113.7, 107.9, 55.2, 48.6, 41.6, 26.1, 22.4. The spectroscopic data match the reported literature<sup>9</sup>.

## UV-visible spectroscopy analysis

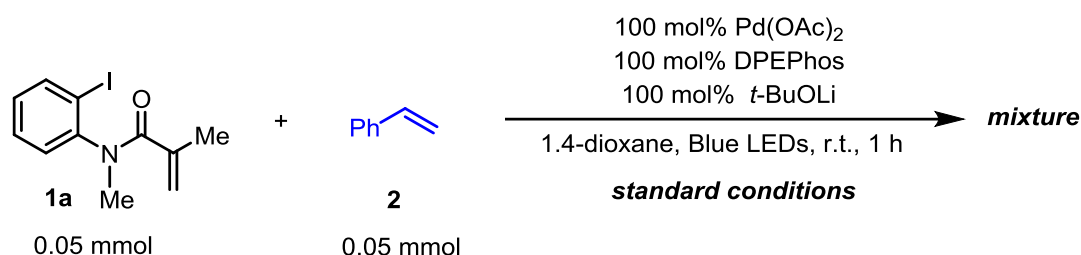

**1a:** N-(2-iodophenyl)-N-methylmethacrylamide (0.05 mmol, 15.1 mg) was added to a 4 mL vial, followed by the addition of 1,4-dioxane (1.5 mL). The mixture was stirred at room temperature for 1 hour. Afterward, 5  $\mu$ L of the reaction solution was diluted with 2995  $\mu$ L of dioxane and analyzed using a UV-visible spectrophotometer.

**Styrene:** Styrene (0.05 mmol, 5.2 mg) was added to a 4 mL vial, followed by the addition of 1,4-dioxane (1.5 mL). The mixture was stirred at room temperature for 1 hour. Subsequently, 5  $\mu$ L of the reaction solution was diluted with 2995  $\mu$ L of dioxane and analyzed using a UV-visible spectrophotometer.

**Pd(OAc)<sub>2</sub>:** Pd(OAc)<sub>2</sub> (0.05 mmol, 11.2 mg) was added to a scaled 4 mL vial, followed by the addition of 1,4-dioxane (1.5 mL). The mixture was stirred at room temperature for 1 hour. Subsequently, 5  $\mu$ L of the reaction solution was diluted with 2995  $\mu$ L of dioxane and analyzed using a UV-visible spectrophotometer.

**DPEPhos:** DPEPhos (0.05 mmol, 26.9 mg) was added to a scaled 4 mL vial, and 1,4-dioxane (1.5 mL) was added to the vial. The mixture was stirred at room temperature for 1 hour. After that, 5  $\mu$ L of the reaction solution was diluted with 2995  $\mu$ L of dioxane and analyzed using a UV-visible spectrophotometer.

**Standard conditions:** Equal equivalents of N-(2-iodophenyl)-N-methyl methacrylamide (0.05 mmol, 15.1 mg), Styrene (0.05 mmol, 5.2 mg), Pd(OAc)<sub>2</sub> (0.05 mmol, 11.2 mg), DPEPhos (0.05 mmol, 26.9 mg), and *t*-BuLi (0.05 mmol, 4 mg) were added to a scaled 4 mL vial, followed by the addition of 1,4-dioxane (1.5 mL). The mixture was stirred at room temperature for 1 hour. Then, 5  $\mu$ L of the reaction solution was diluted with 2995  $\mu$ L of dioxane and analyzed using a UV-visible spectrophotometer.

We conducted UV-Vis spectra analysis of the reaction mixture and reactants, which revealed that the complex formed by Pd(OAc)<sub>2</sub> and DPEPhos exhibits absorption in the blue light range at wavelengths of 460-465 nm, indicating its photosensitivity as a photocatalyst in the reaction. In contrast, other reactants 1a, styrene and DPEPhos showed no absorption peaks in the blue light range. While Pd(OAc)<sub>2</sub> itself exhibited weak absorption under blue light, the combination with DPEPhos significantly enhanced the absorption effect.

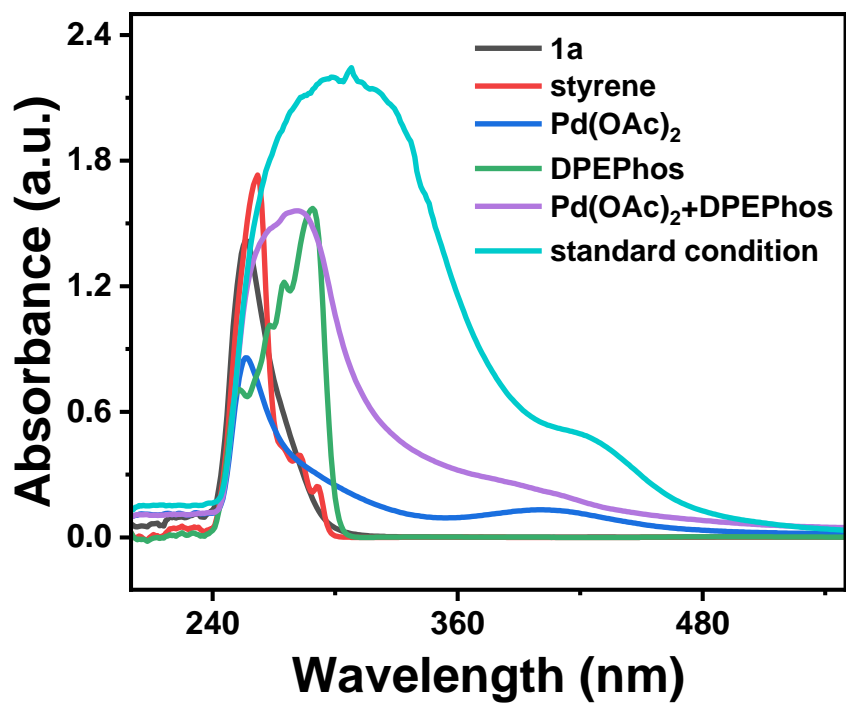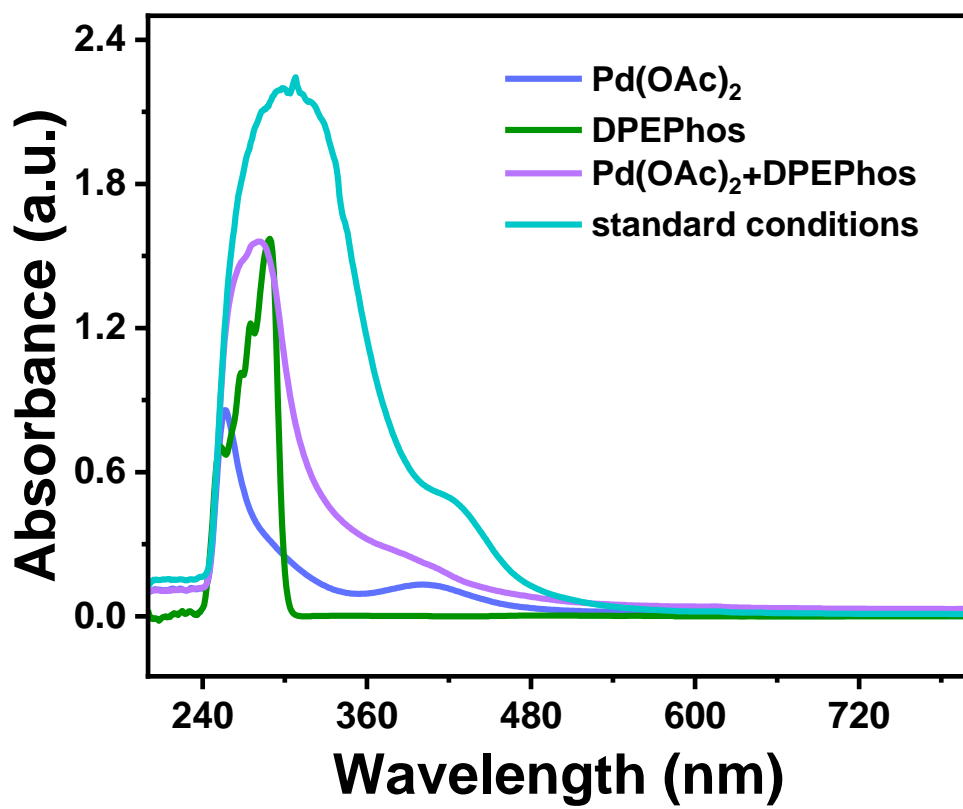

## Reference

- 1 A. Marchese, A. Durant, C. Reid, R. Arora, M. Lautens, *J. Am. Chem. Soc.*, 2022, **144**, 20554.
- 2 S. Ochi, Z. Zhang, Y. Xia, G. B. Dong, *Angew. Chem.; Int. Ed.*, 2022, **61**, e202202703.
- 3 L. Lu, J. C. Siu, Y. Lai, S. Lin, *J. Am. Chem. Soc.* 2020, **142**, 21272.
- 4 J. Lee, S. Radomkit, S. Torker, J. del Pozo, A. H. Hoveyda, *Nat. Chem.*, 2018, **10**, 99.
- 5 M. L. Conner, M. K. Brown, *J. Org. Chem.*, 2016, **81**, 8050.
- 6 D. Gärtner, A. Welther, B. R. Rad, R. Wolf, A. J. Wangelin, *Angew. Chem.; Int. Ed.*, 2014, **53**, 3722
- 7 C.-Y. Huang, A. G. Doyle, *J. Am. Chem. Soc.*, 2012, **134**, 9541.
- 8 S. Gao, H. Liu, Z.-J. Wu, H.-Q. Yao, A.-J. Lin, *Green Chem.*, 2017, **19**, 1861.
- 9 X.-L. Liu, Z.-H. Gu, *Org. Chem. Front.*, 2015, **2**, 778.
- 10 X.-G. Wu, Z.-Q. Tang, C.-X. Zhang, C.-C. Wang, L.-C. Wu, J.-P. Qu, Y.-F. Chen, *Org. Lett.*, 2020, **22**, 3915.
- 11 J.-M. Guo, Z.-Y. Mao, C.-H. Liu, S.-Y. Yang, B.-G. Wei, *J. Org. Chem.*, 2022, **87**, 11838.
- 12 B. Zhou, W. Hou, Y. Yang, H. Feng, Y. Li, *Org. Lett.*, 2014, **16**, 1322.



# NMR Spectra

## 1g, <sup>1</sup>H NMR (400 MHz, CDCl<sub>3</sub>)

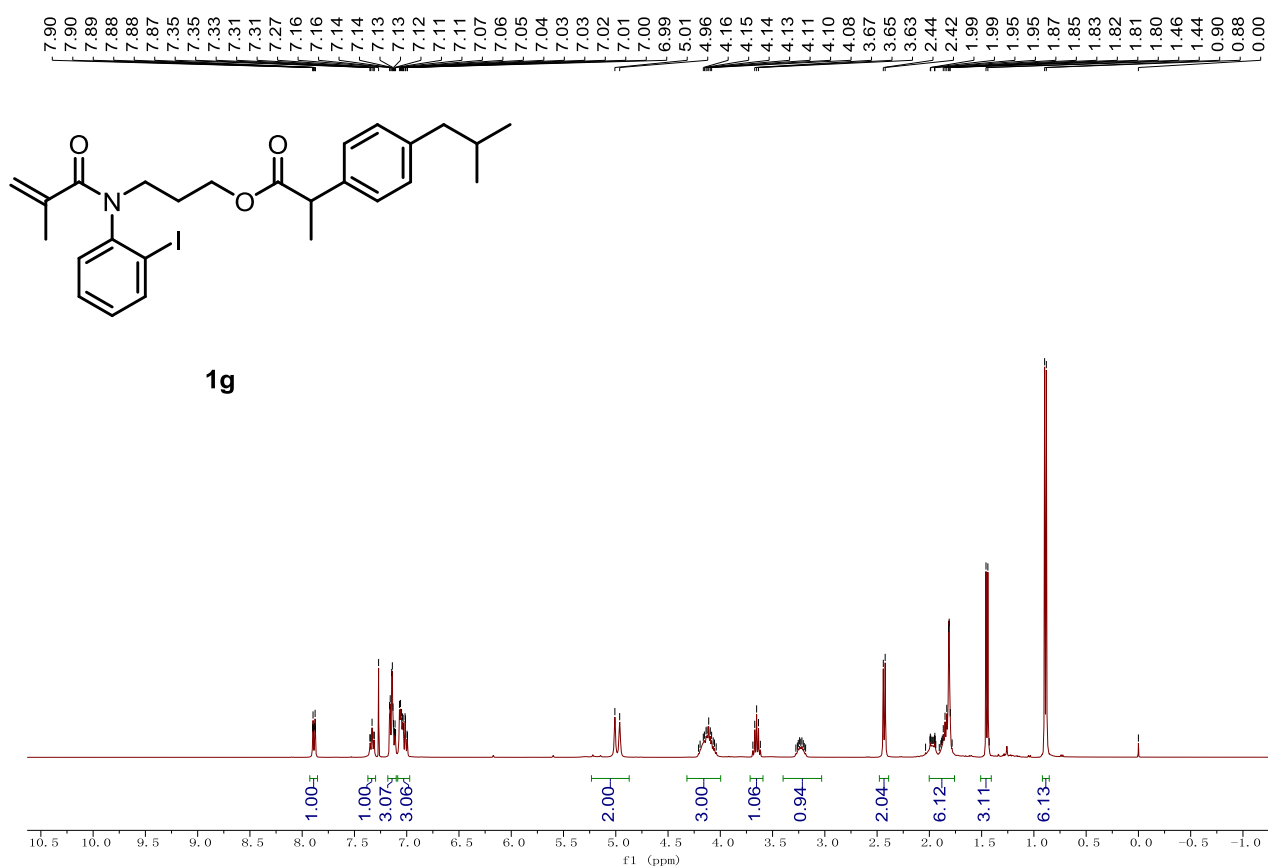

## 1g, <sup>13</sup>C NMR (101 MHz, CDCl<sub>3</sub>)

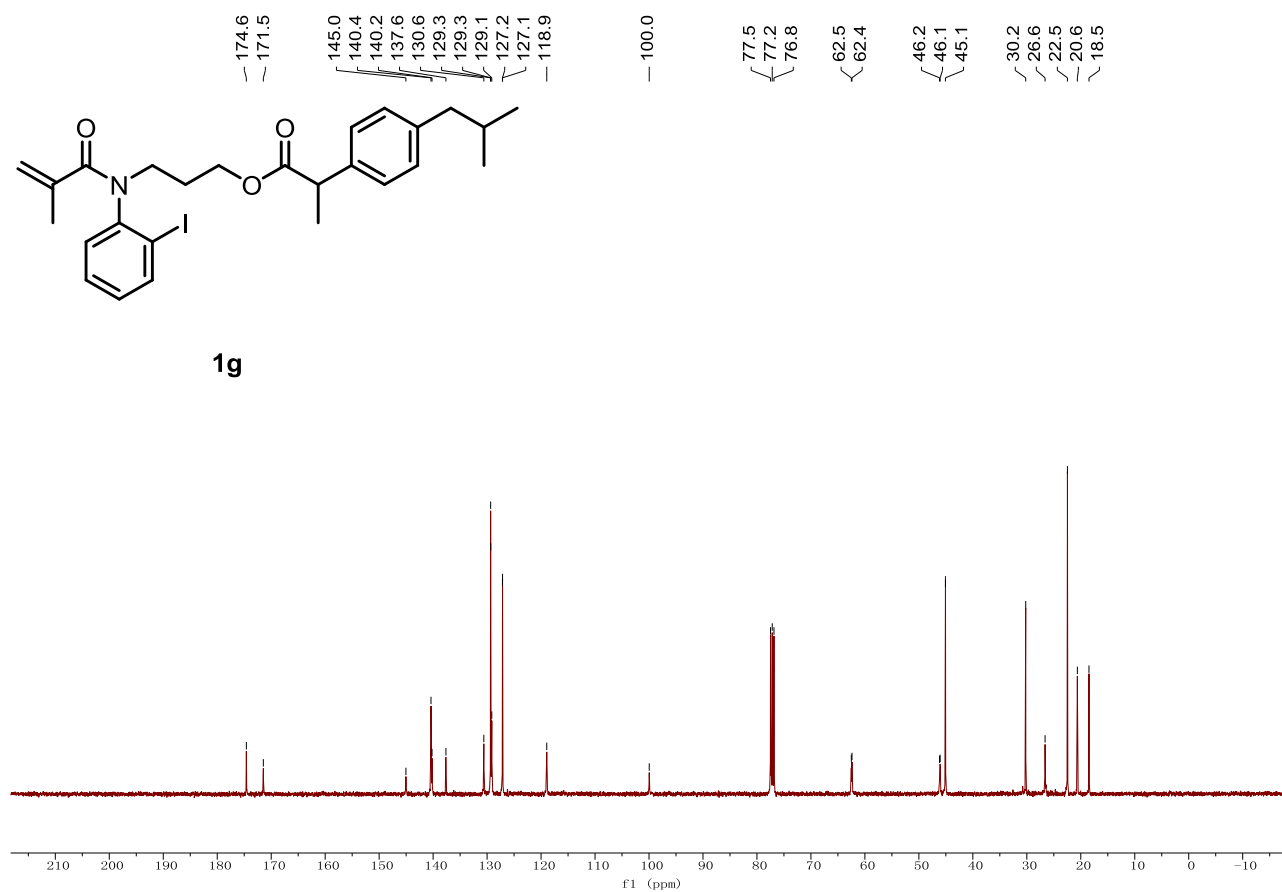

**1h, <sup>1</sup>H NMR (400 MHz, CDCl<sub>3</sub>)**

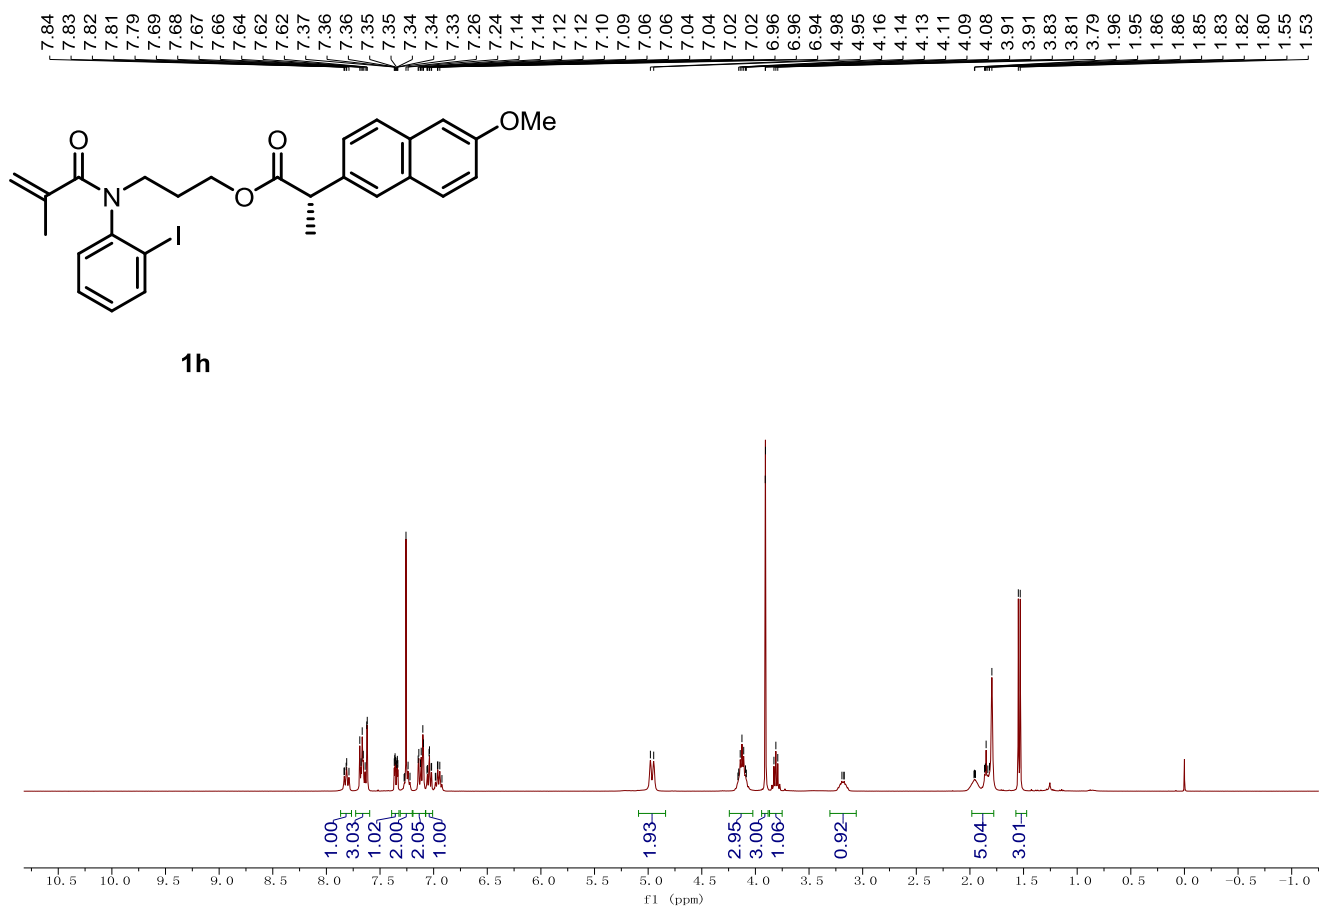

**1h, <sup>13</sup>C NMR (101 MHz, CDCl<sub>3</sub>)**

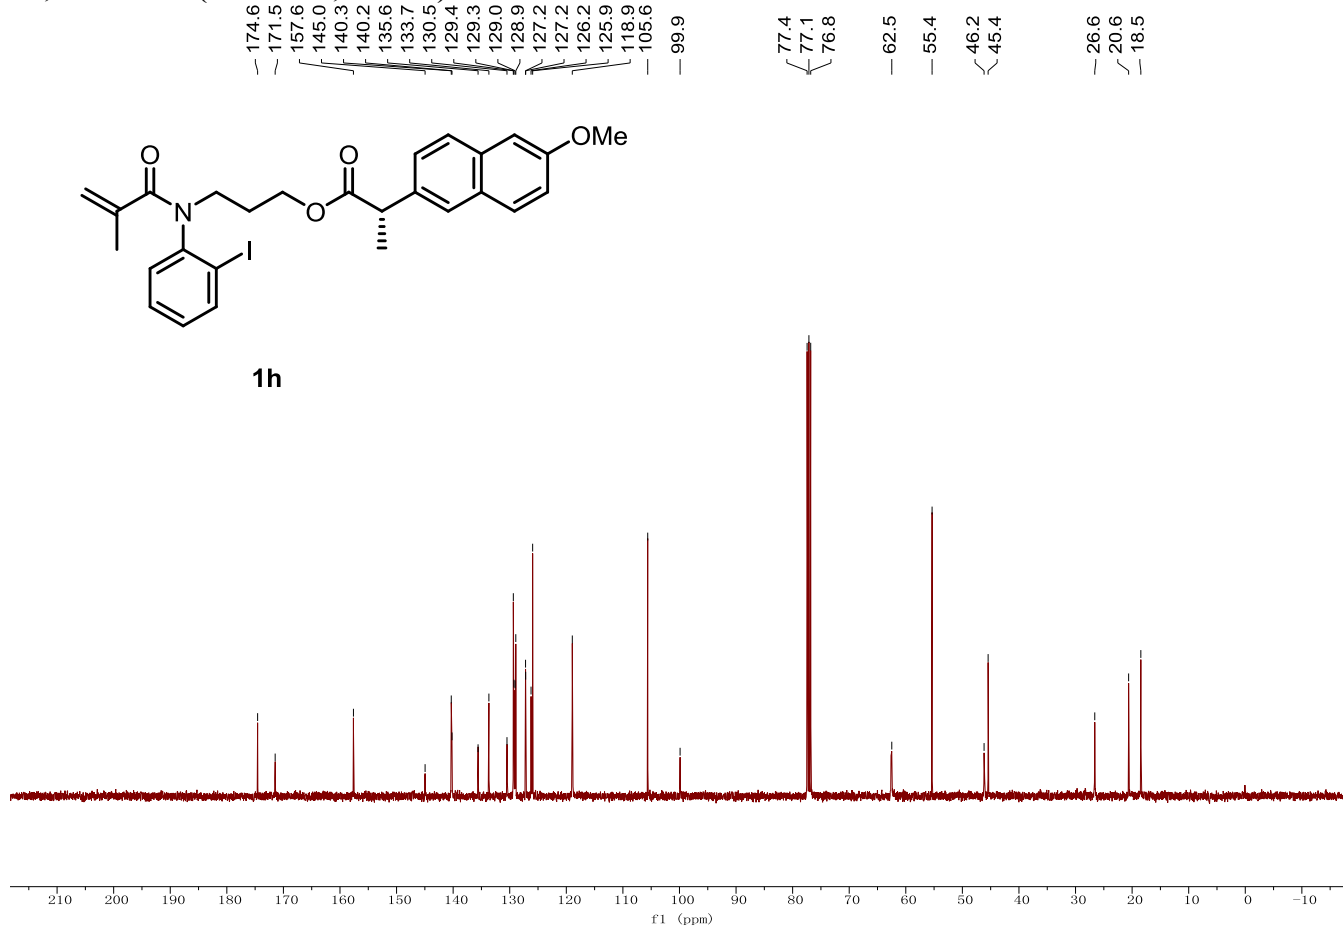

### 3a, <sup>1</sup>H NMR (400 MHz, CDCl<sub>3</sub>)

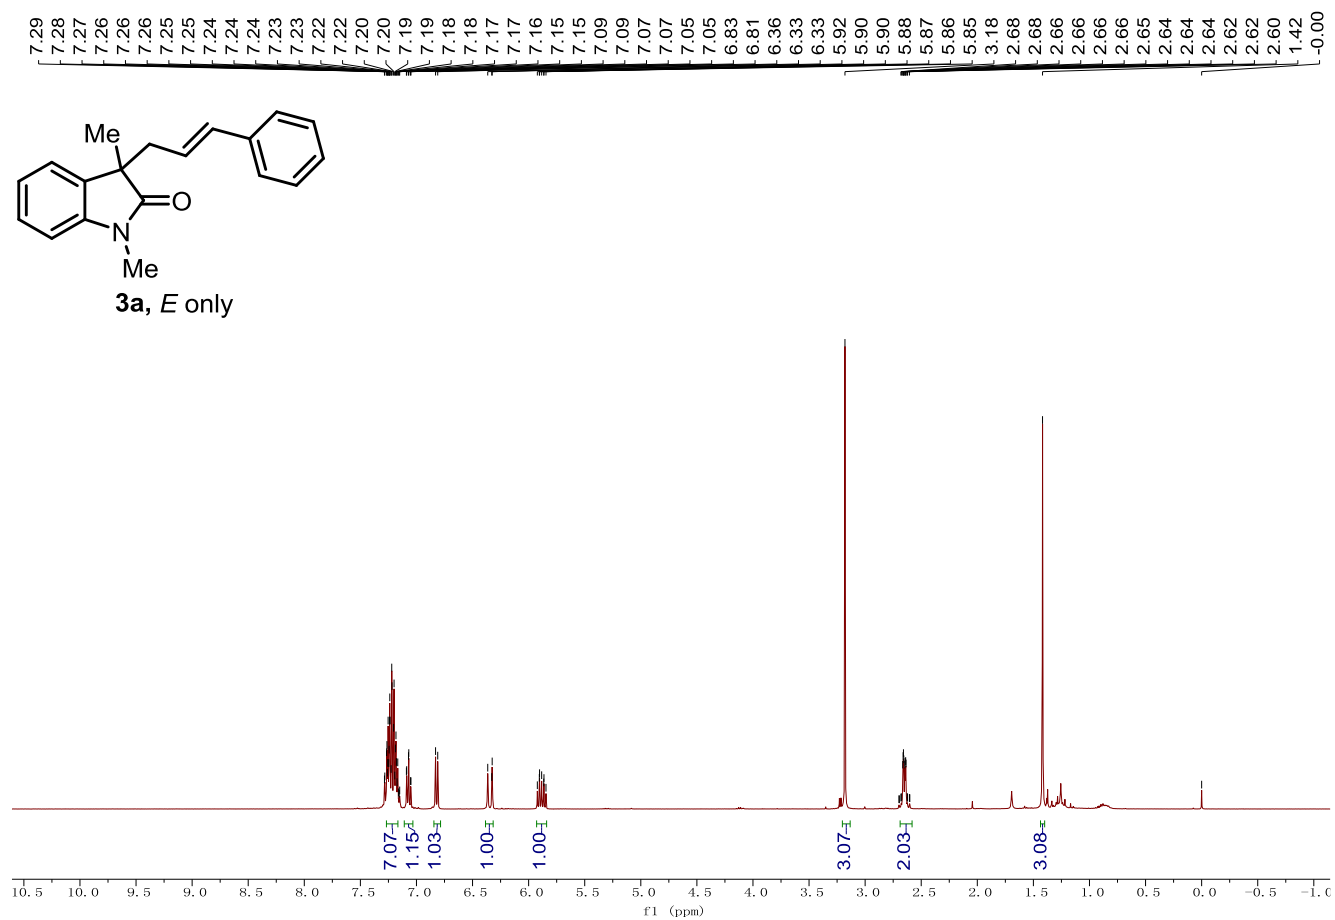

### 3a, <sup>13</sup>C NMR (101 MHz, CDCl<sub>3</sub>)

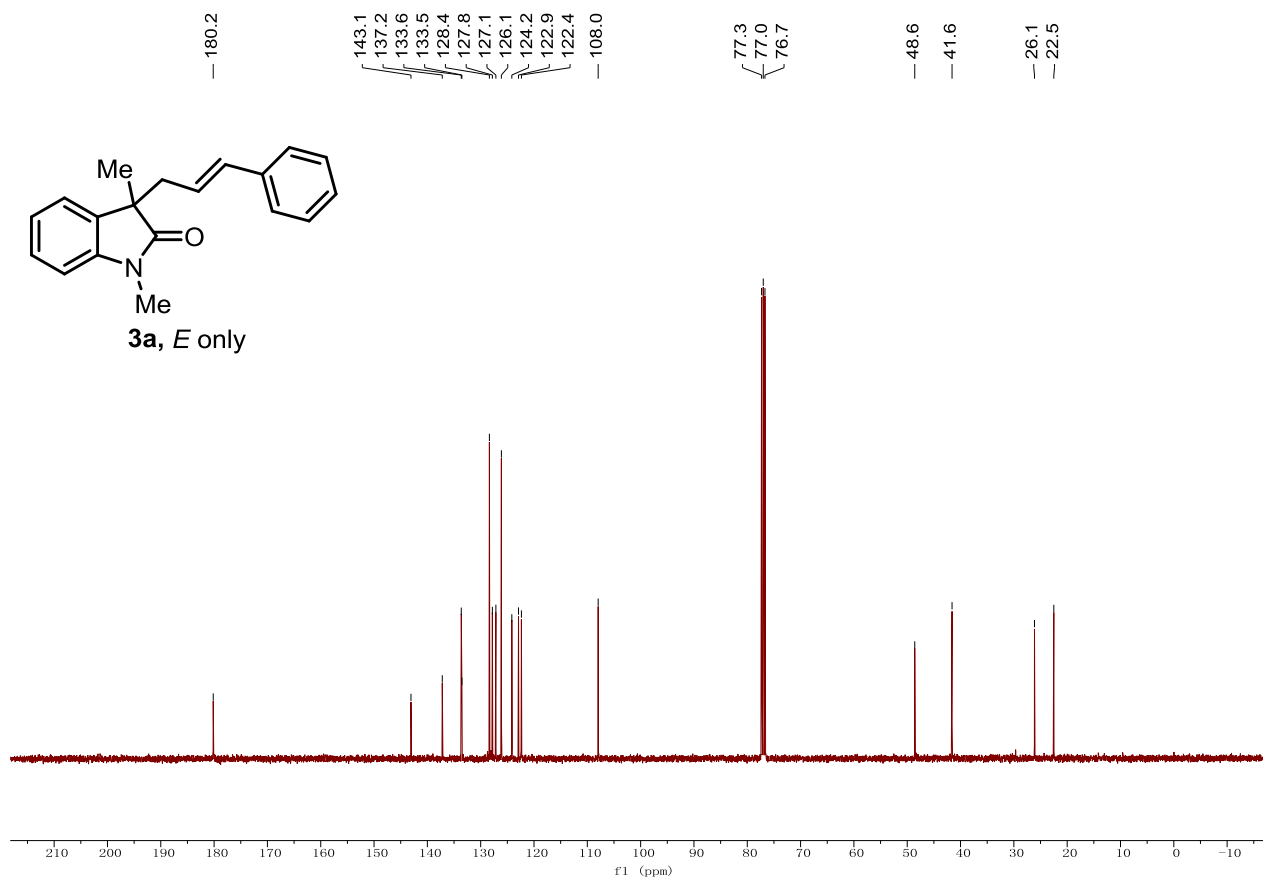

### 3b, <sup>1</sup>H NMR (400 MHz, CDCl<sub>3</sub>)

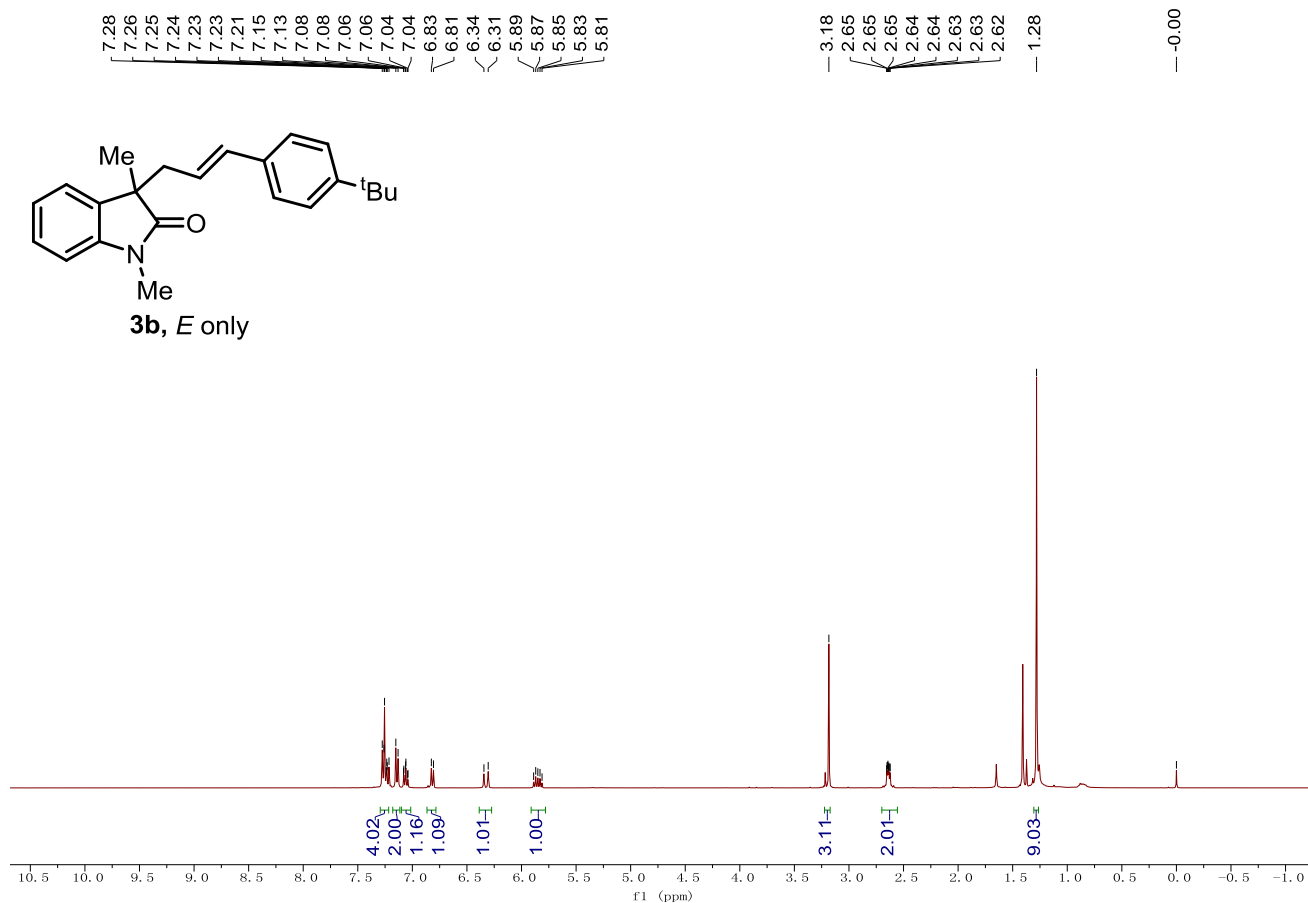

### 3b, <sup>13</sup>C NMR (101 MHz, CDCl<sub>3</sub>)

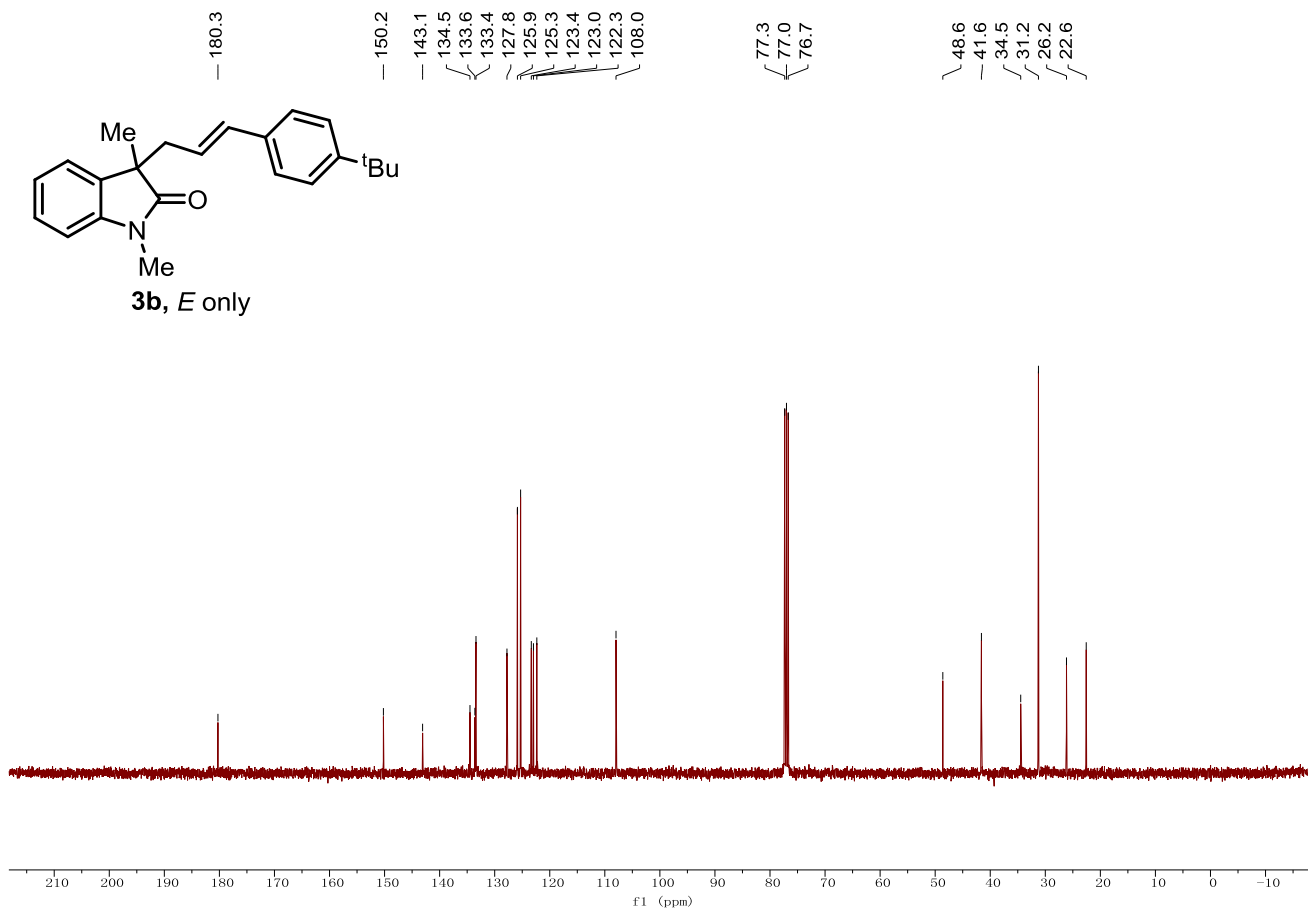

**3c, <sup>1</sup>H NMR (400 MHz, CDCl<sub>3</sub>)**

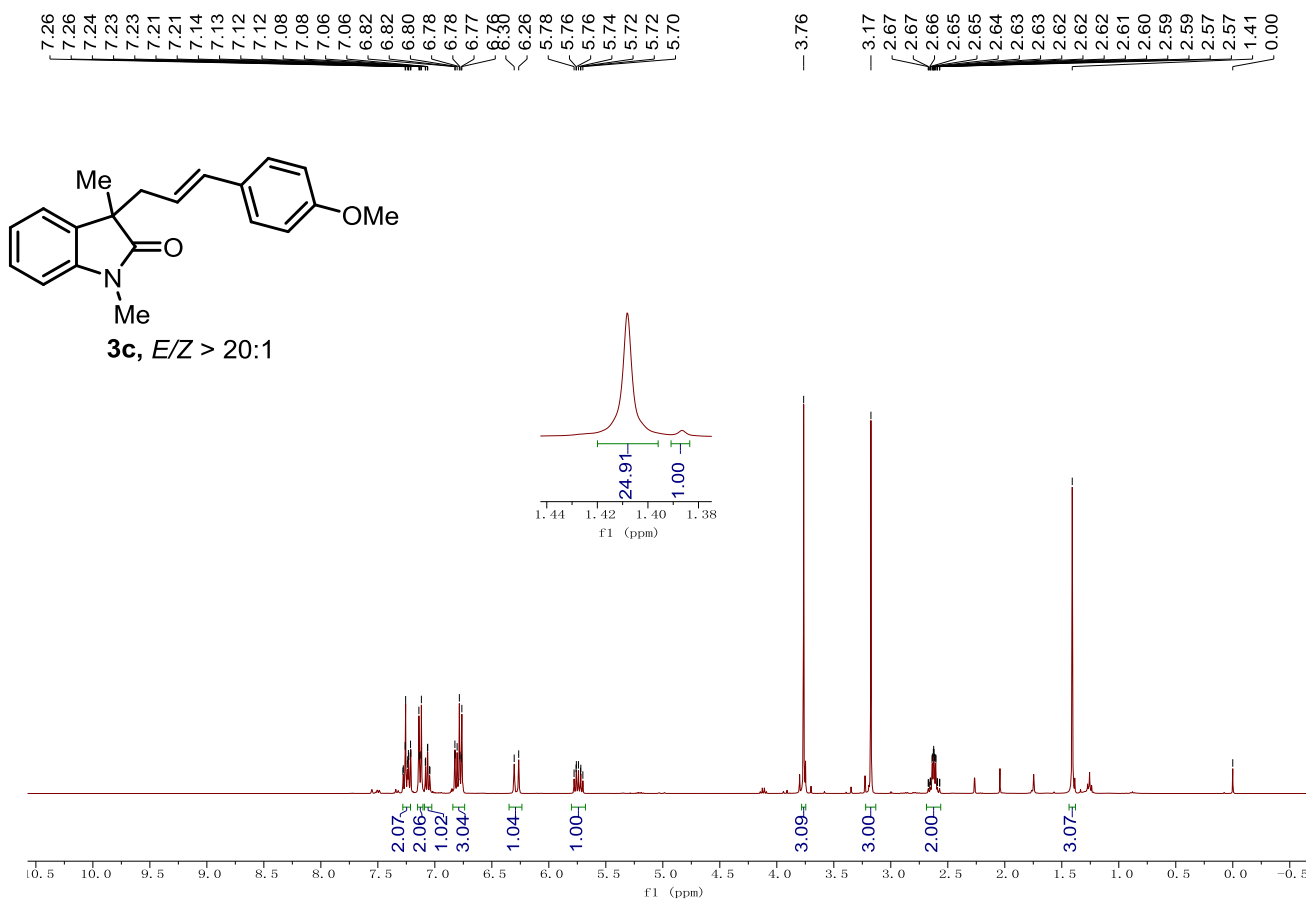

**3c, <sup>13</sup>C NMR (101 MHz, CDCl<sub>3</sub>)**

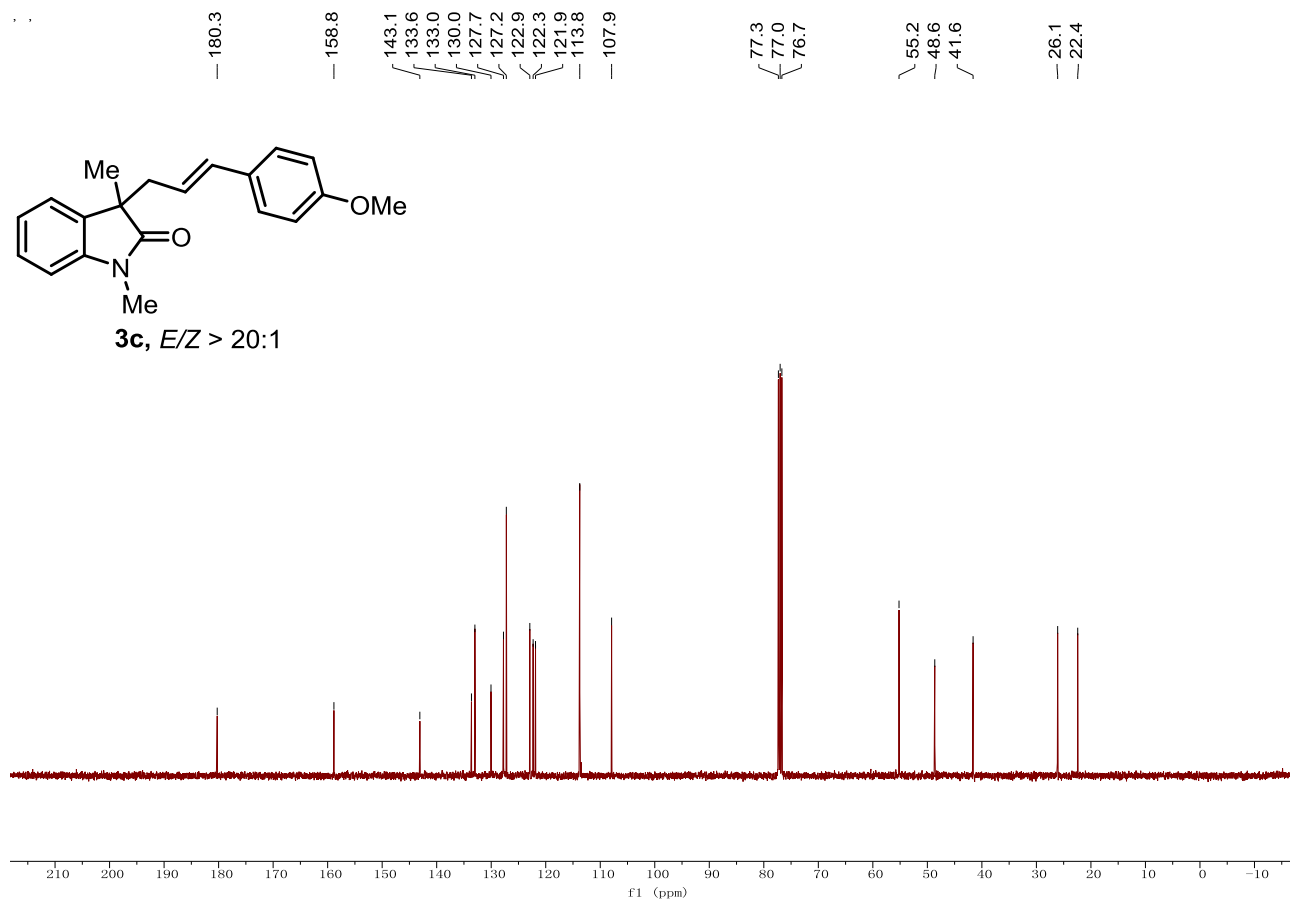

**3d, <sup>1</sup>H NMR (400 MHz, CDCl<sub>3</sub>)**

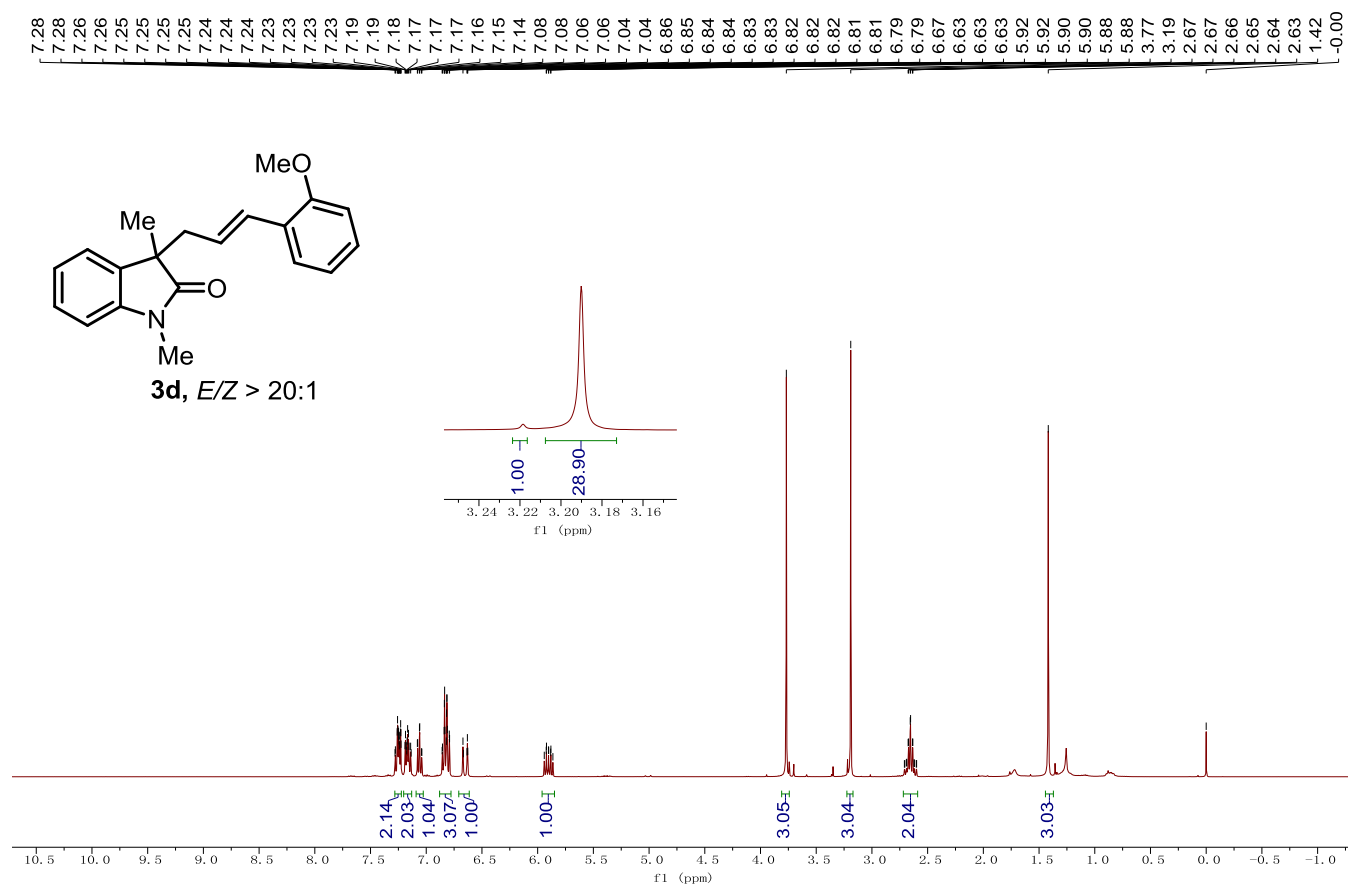

**3d, <sup>13</sup>C NMR (101 MHz, CDCl<sub>3</sub>)**

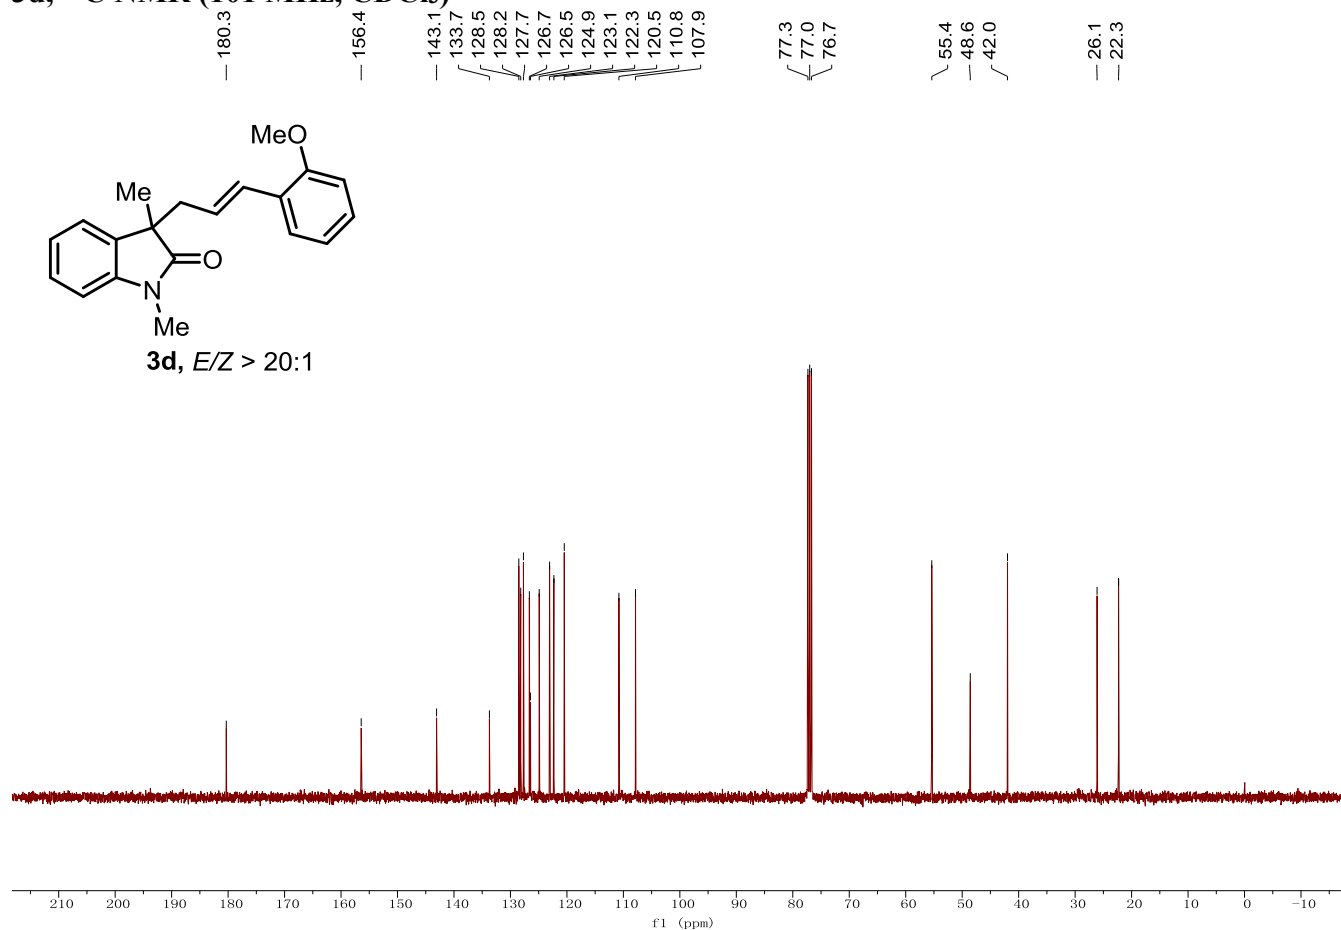

**3e, <sup>1</sup>H NMR (400 MHz, CDCl<sub>3</sub>)**

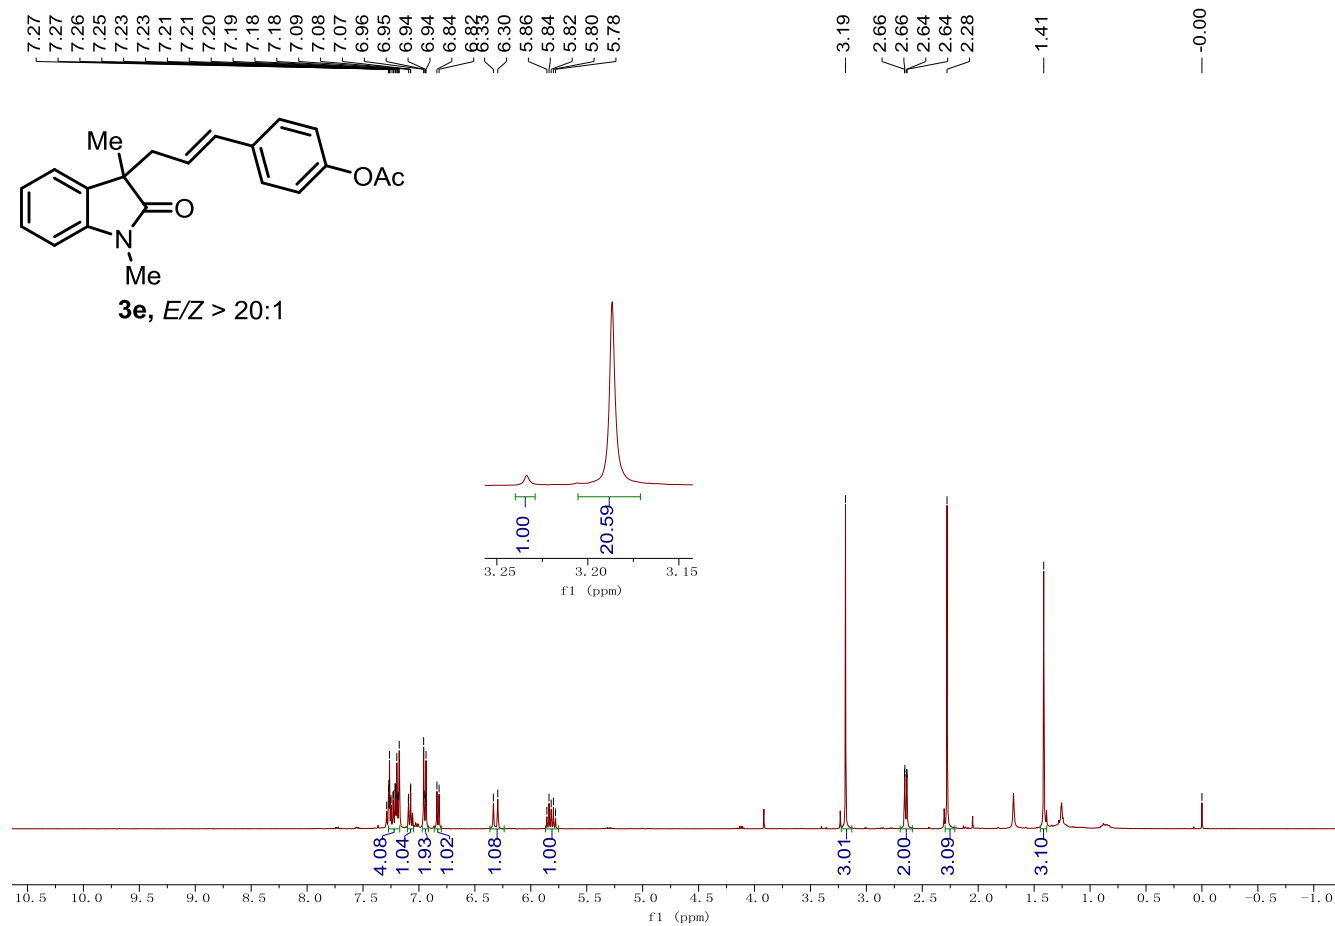

**3e, <sup>13</sup>C NMR (101 MHz, CDCl<sub>3</sub>)**

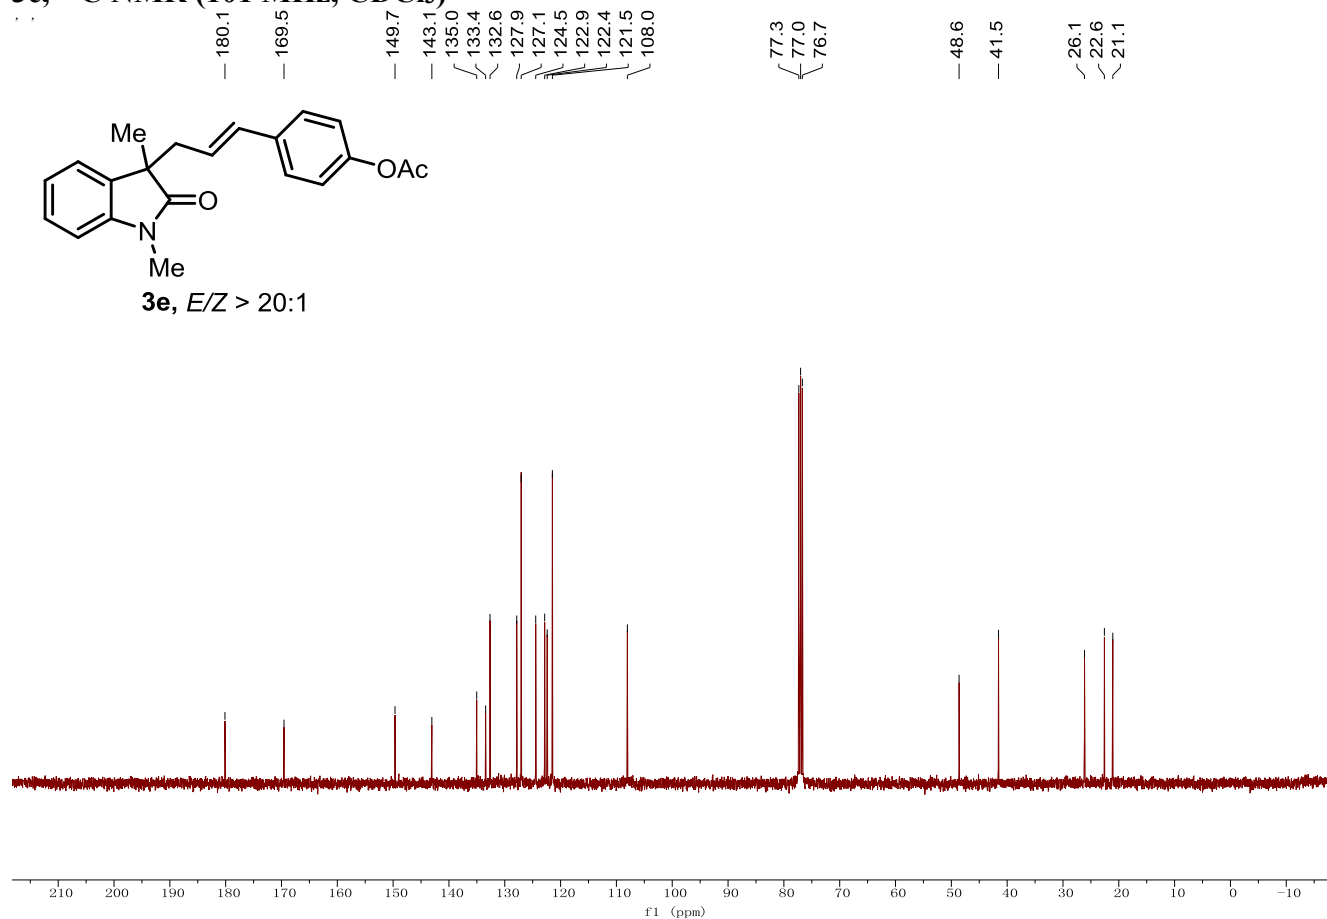

**3f, <sup>1</sup>H NMR (400 MHz, CDCl<sub>3</sub>)**

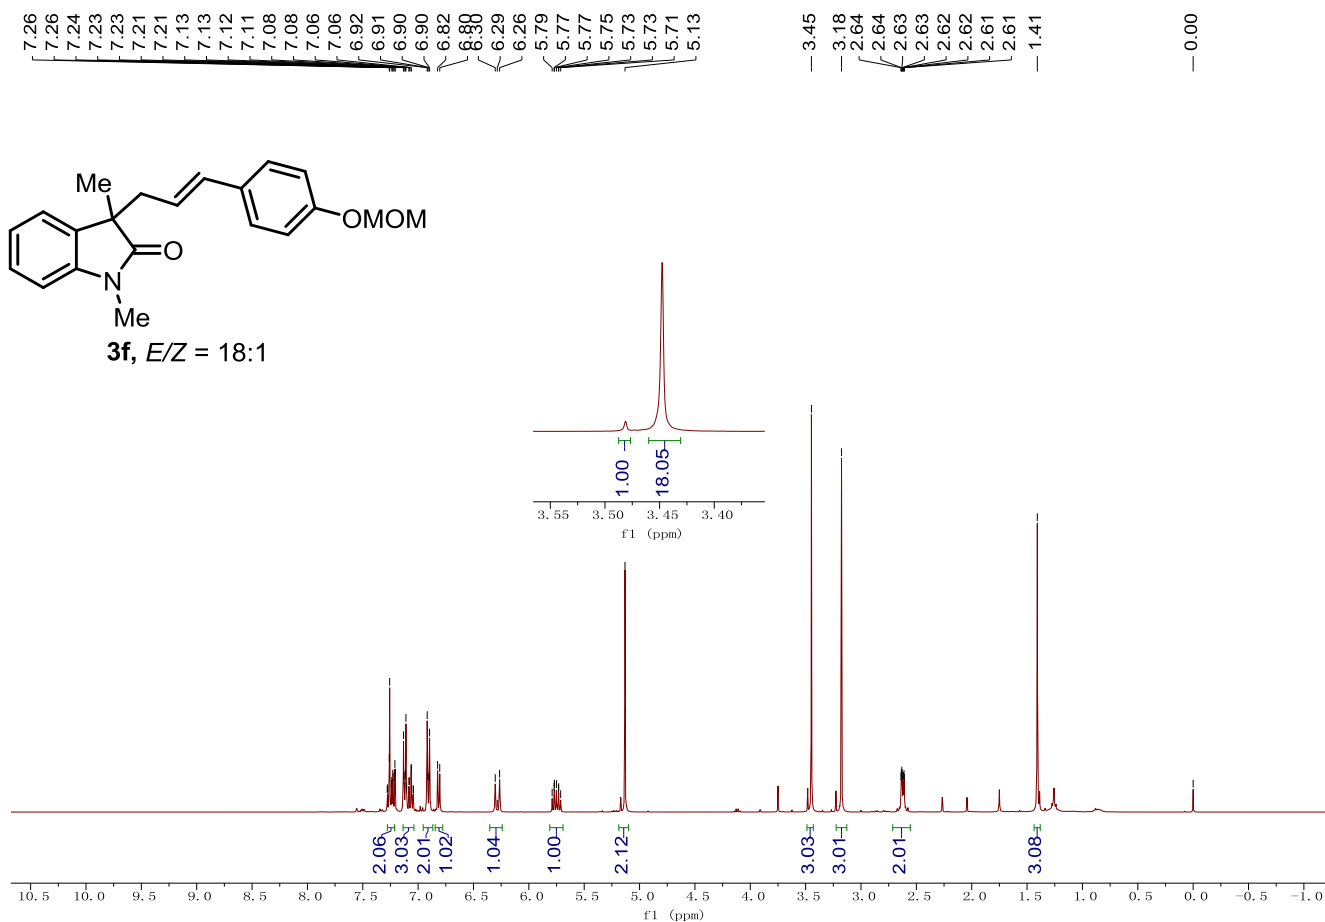

**3f, <sup>13</sup>C NMR (101 MHz, CDCl<sub>3</sub>)**

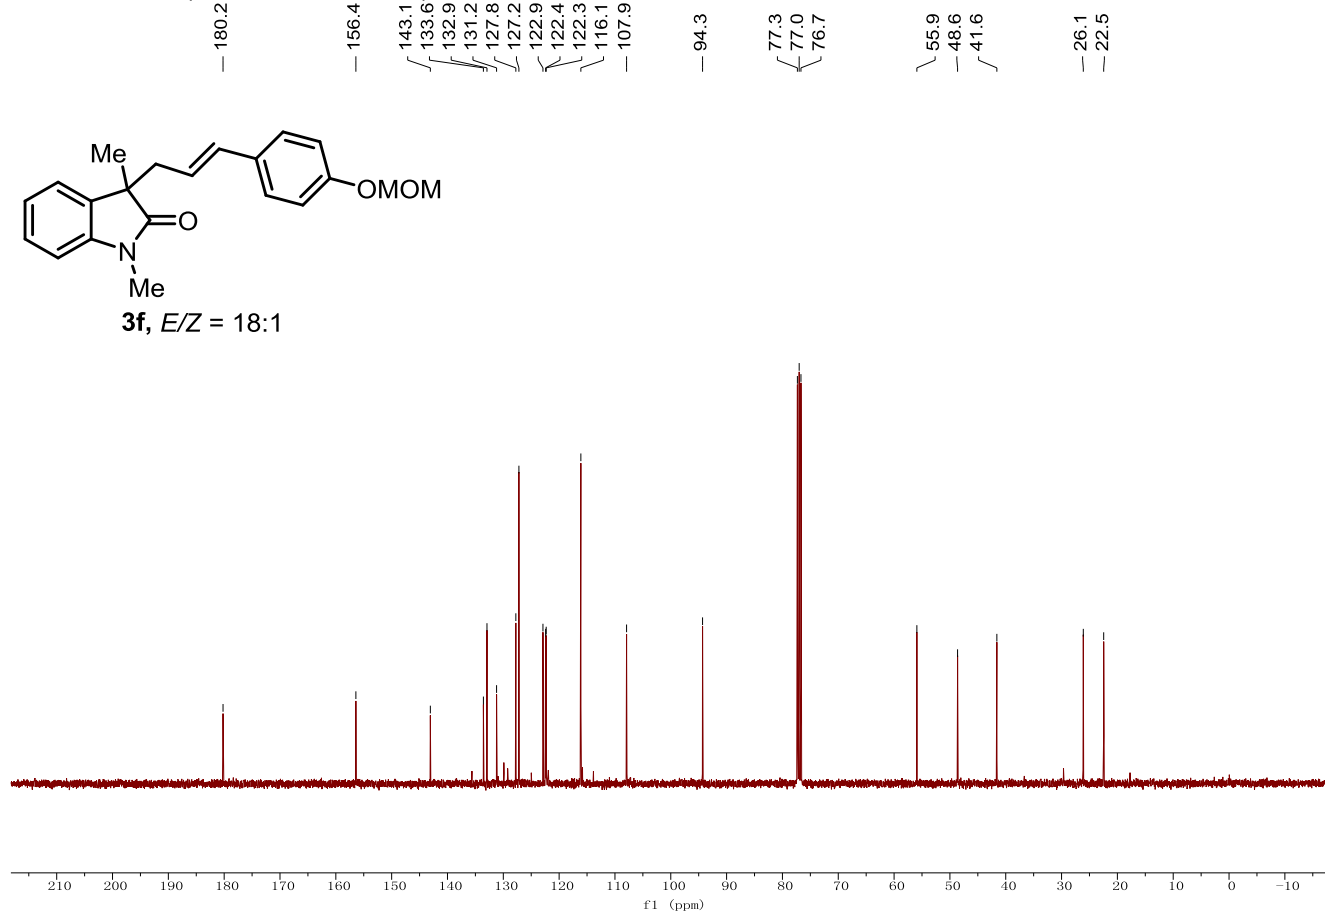



### 3g, <sup>1</sup>H NMR (400 MHz, CDCl<sub>3</sub>)

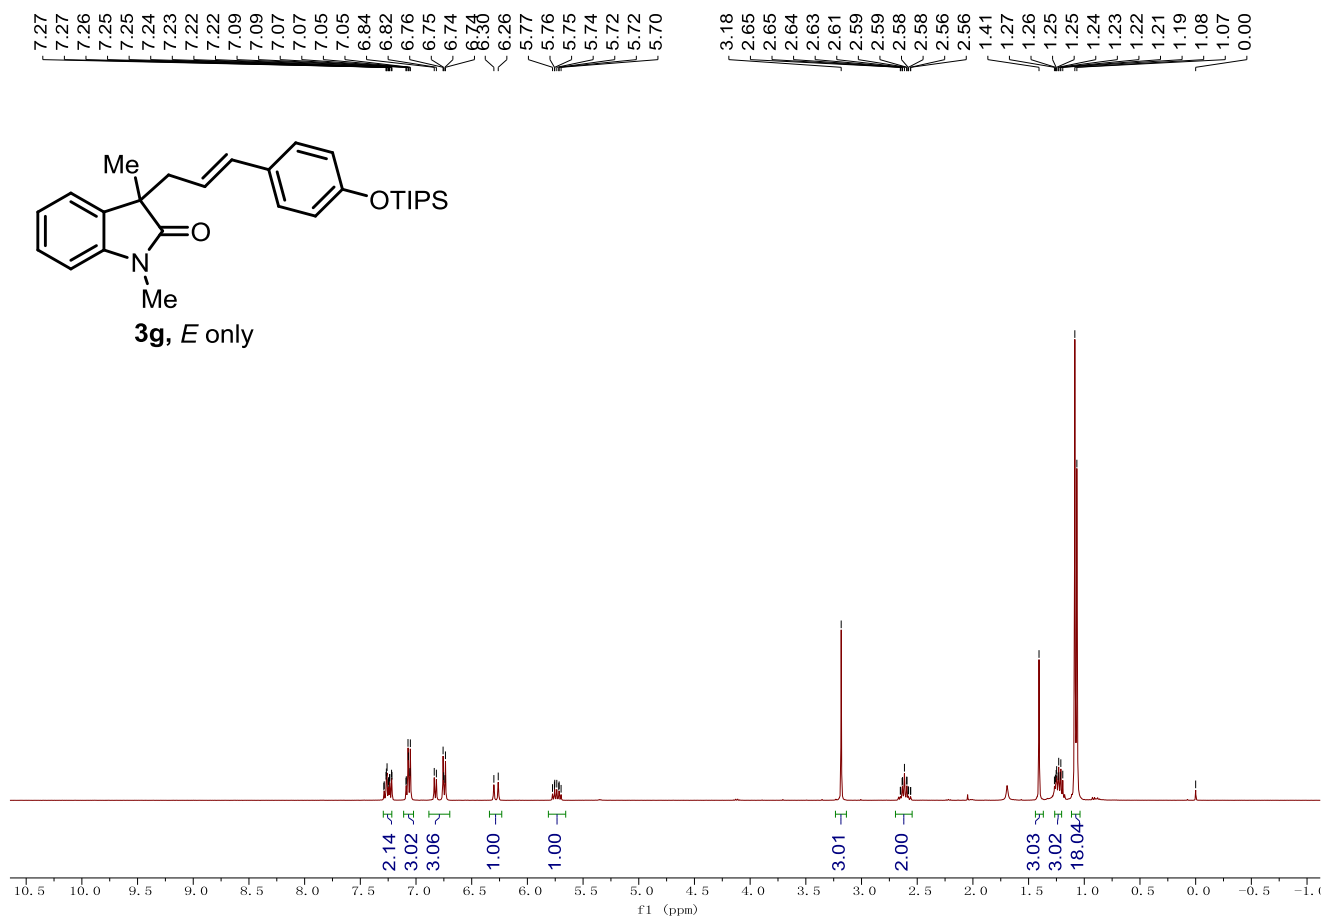

### 3g, <sup>13</sup>C NMR (101 MHz, CDCl<sub>3</sub>)

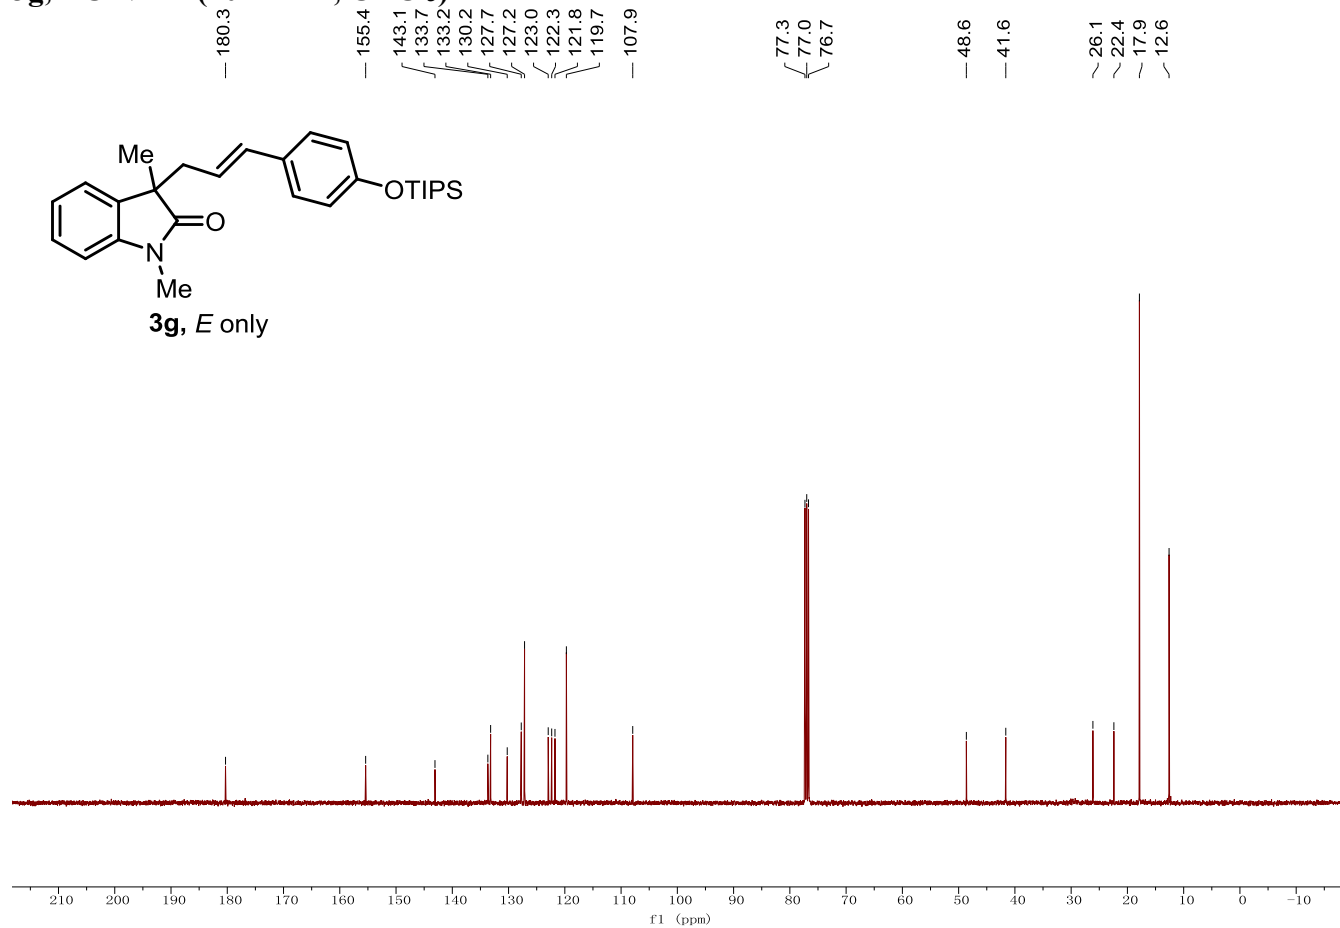

### 3h, <sup>1</sup>H NMR (400 MHz, CDCl<sub>3</sub>)

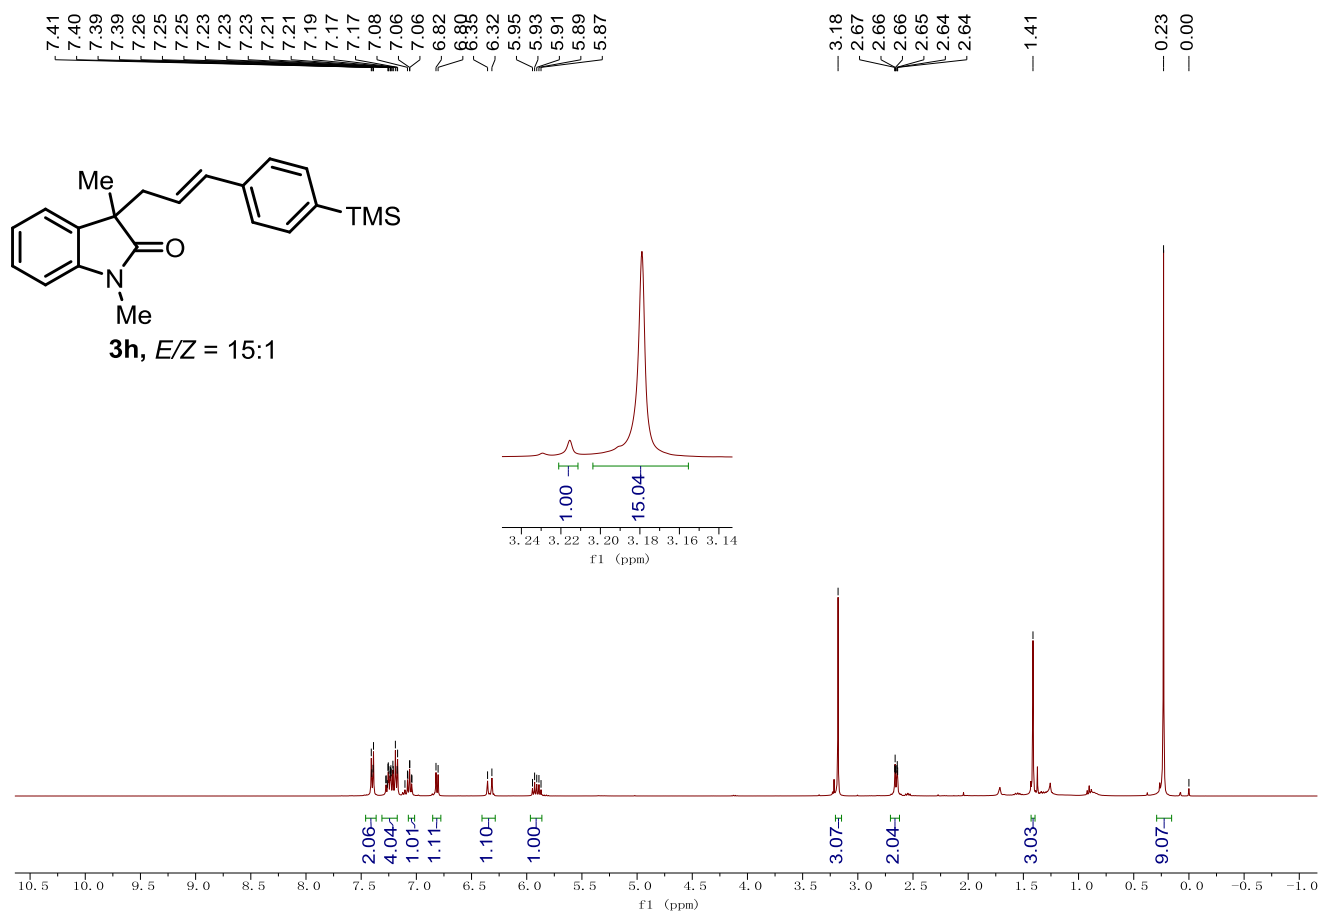

### 3h, <sup>13</sup>C NMR (101 MHz, CDCl<sub>3</sub>)

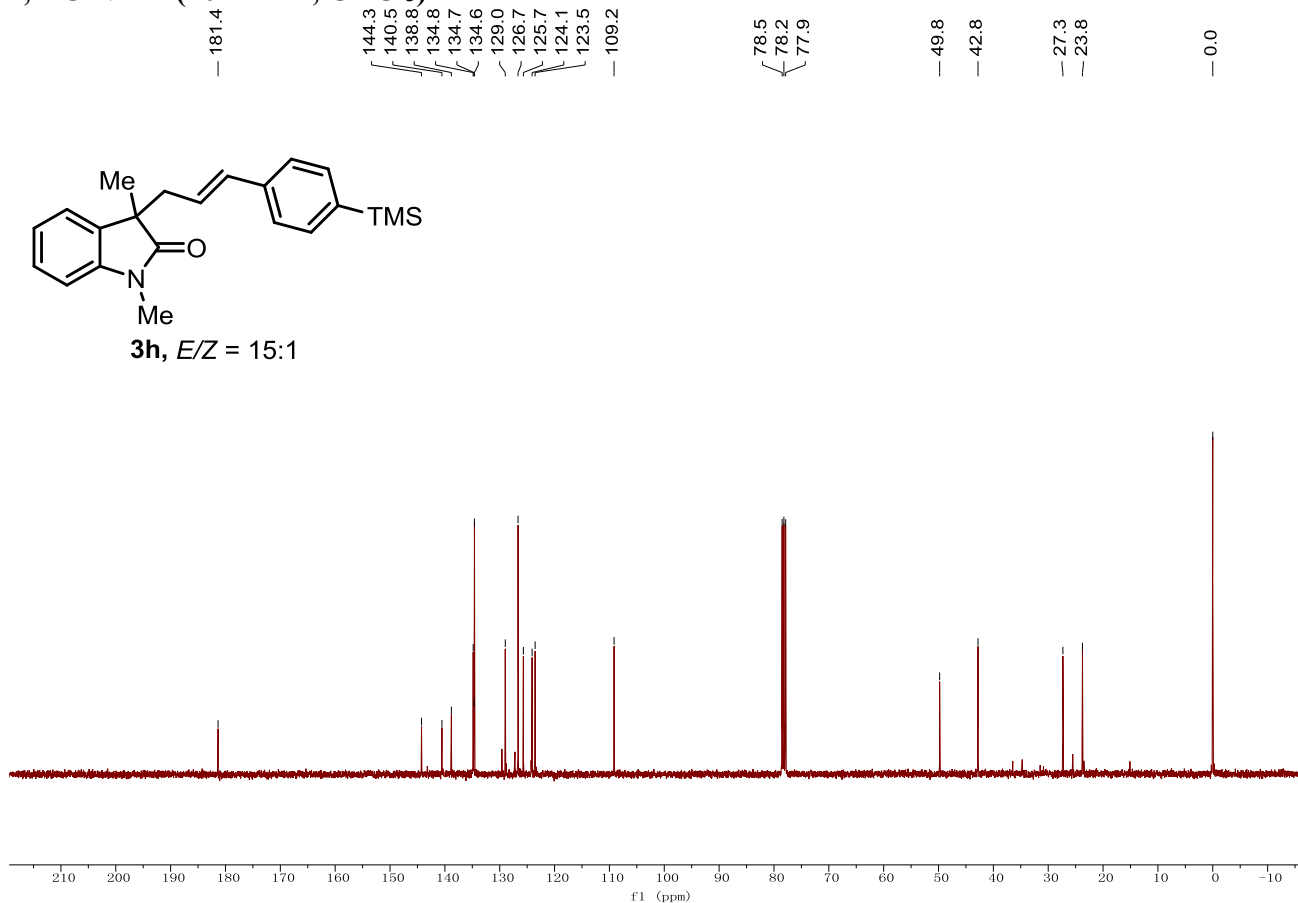

**3i, <sup>1</sup>H NMR (400 MHz, CDCl<sub>3</sub>)**

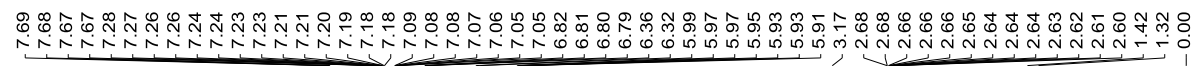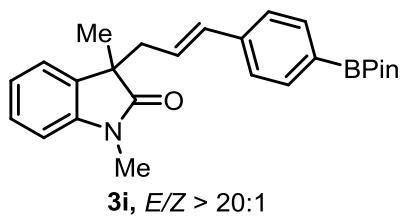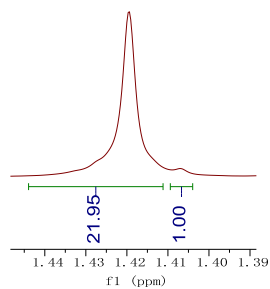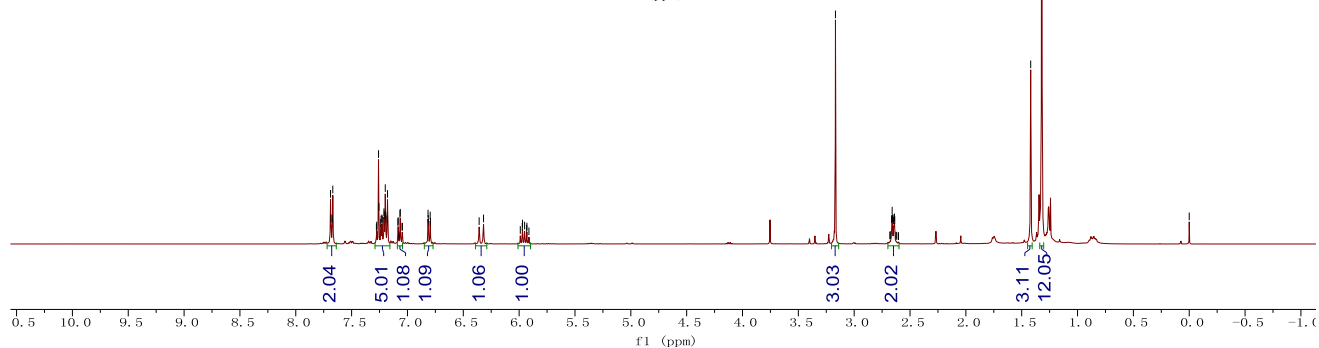

**3i, <sup>13</sup>C NMR (101 MHz, CDCl<sub>3</sub>)**

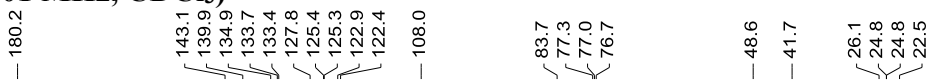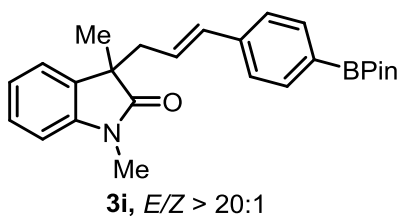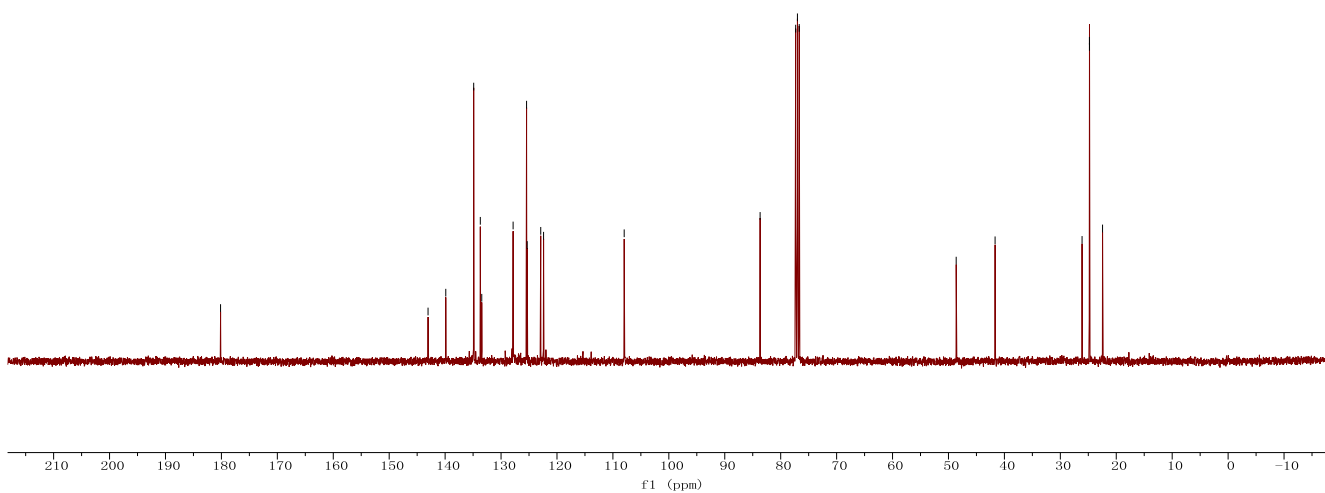

**3j, <sup>1</sup>H NMR (400 MHz, CDCl<sub>3</sub>)**

7.27  
7.27  
7.26  
7.25  
7.23  
7.23  
7.23  
7.21  
7.21  
7.21  
7.16  
7.14  
7.14  
7.13  
7.12  
7.09  
7.09  
7.08  
7.07  
6.94  
6.94  
6.92  
6.91  
6.89  
6.84  
6.84  
6.83  
6.82  
6.82  
6.81  
6.81  
6.32  
6.28  
5.80  
5.78  
5.76  
2.65  
2.64  
2.63  
2.63  
— 1.41  
— 0.00

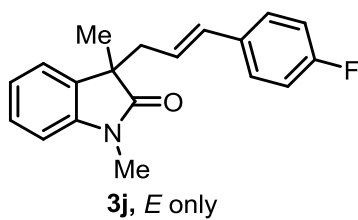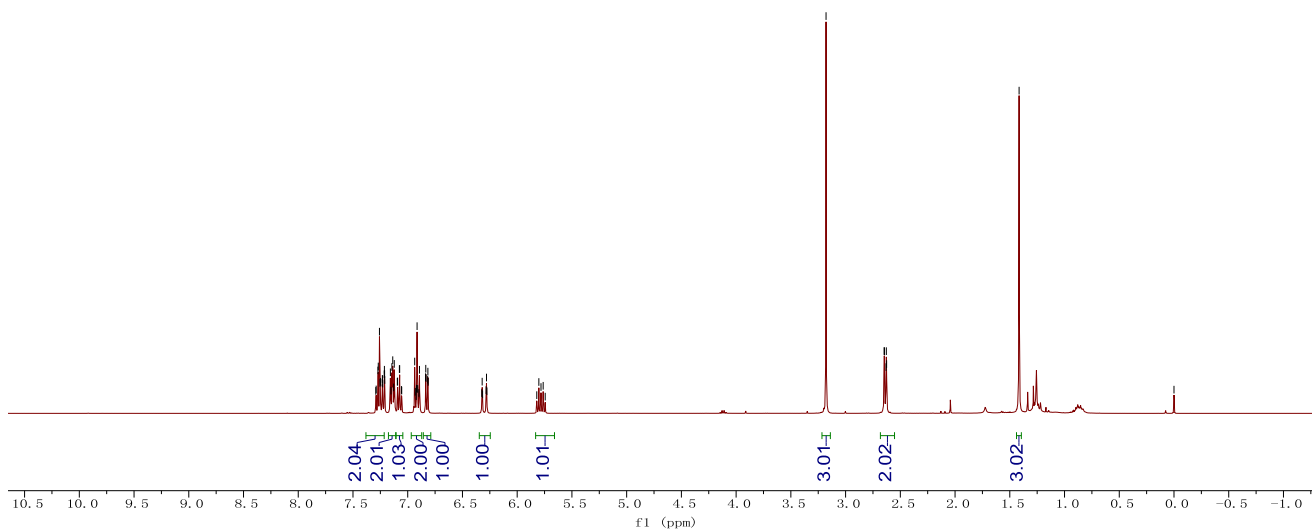

**3j, <sup>13</sup>C NMR (101 MHz, CDCl<sub>3</sub>)**

180.1  
163.2  
160.8  
143.1  
133.5  
133.4  
133.3  
132.4  
127.9  
127.6  
127.5  
123.9  
123.9  
122.9  
122.4  
115.3  
115.1  
108.0  
77.3  
77.0  
76.7  
48.6  
41.5  
26.1  
22.5

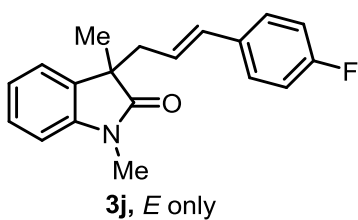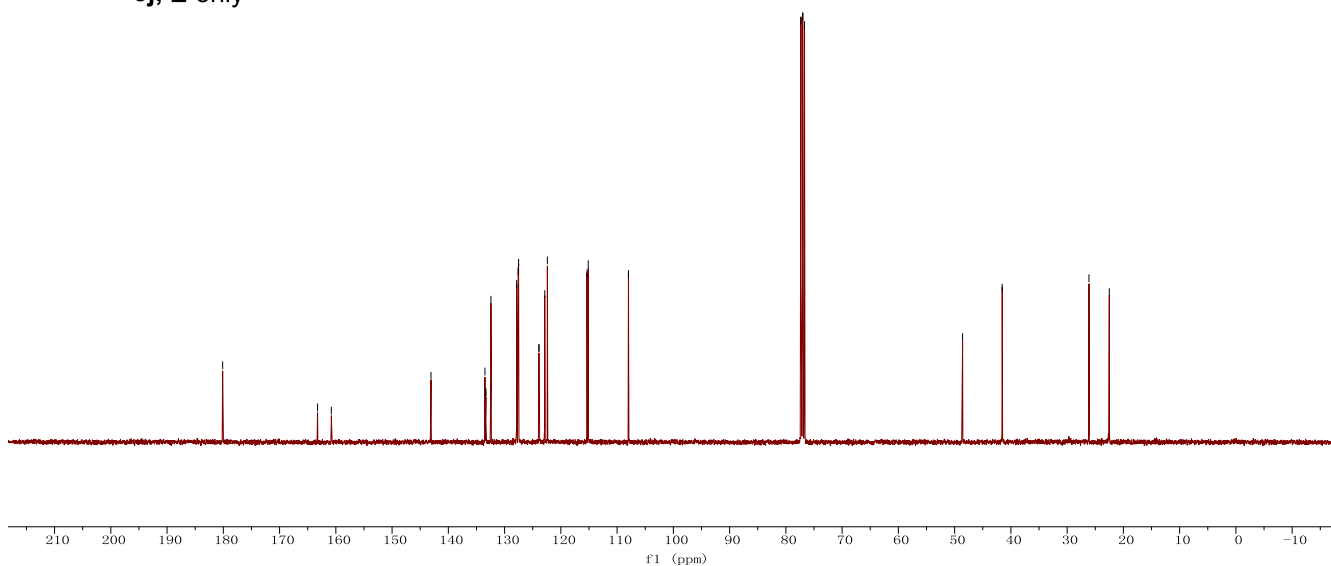

**3j,  $^{19}\text{F}$  NMR (101 MHz,  $\text{CDCl}_3$ )**

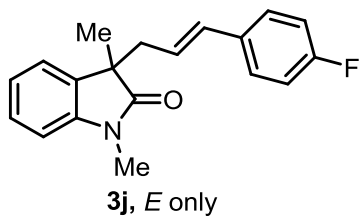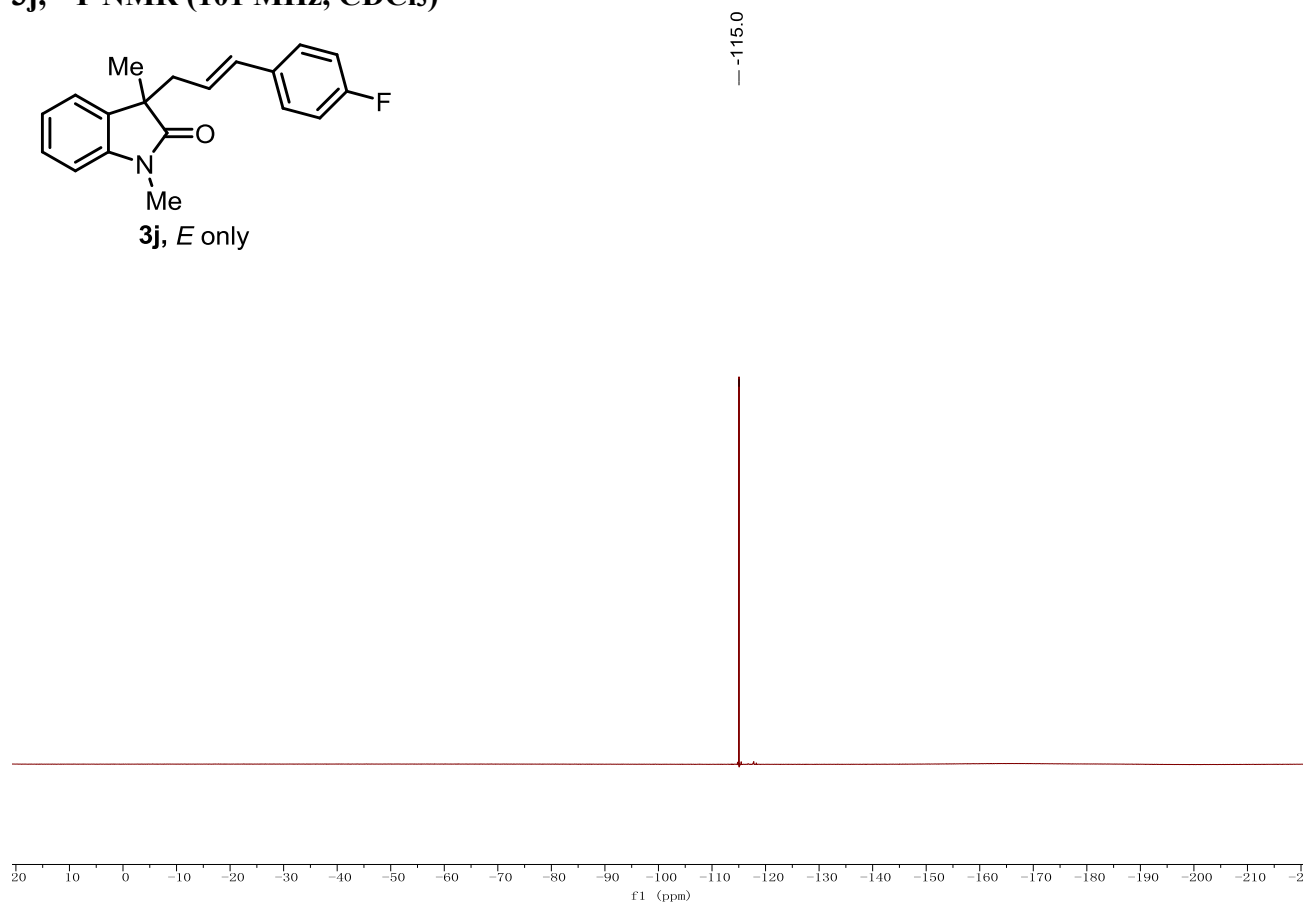

**3k,  $^1\text{H}$  NMR (400 MHz,  $\text{CDCl}_3$ )**

7.29 7.27 7.26 7.25 7.23 7.21 7.20 7.18 7.18 7.11 7.09 7.08 7.06 6.83 6.81 6.31 6.27 5.89 5.88 5.87 5.86 5.84 5.83 5.82 5.81 5.80

3.18 3.17 2.65 2.63

1.42 1.41

-0.00

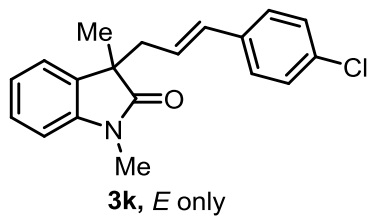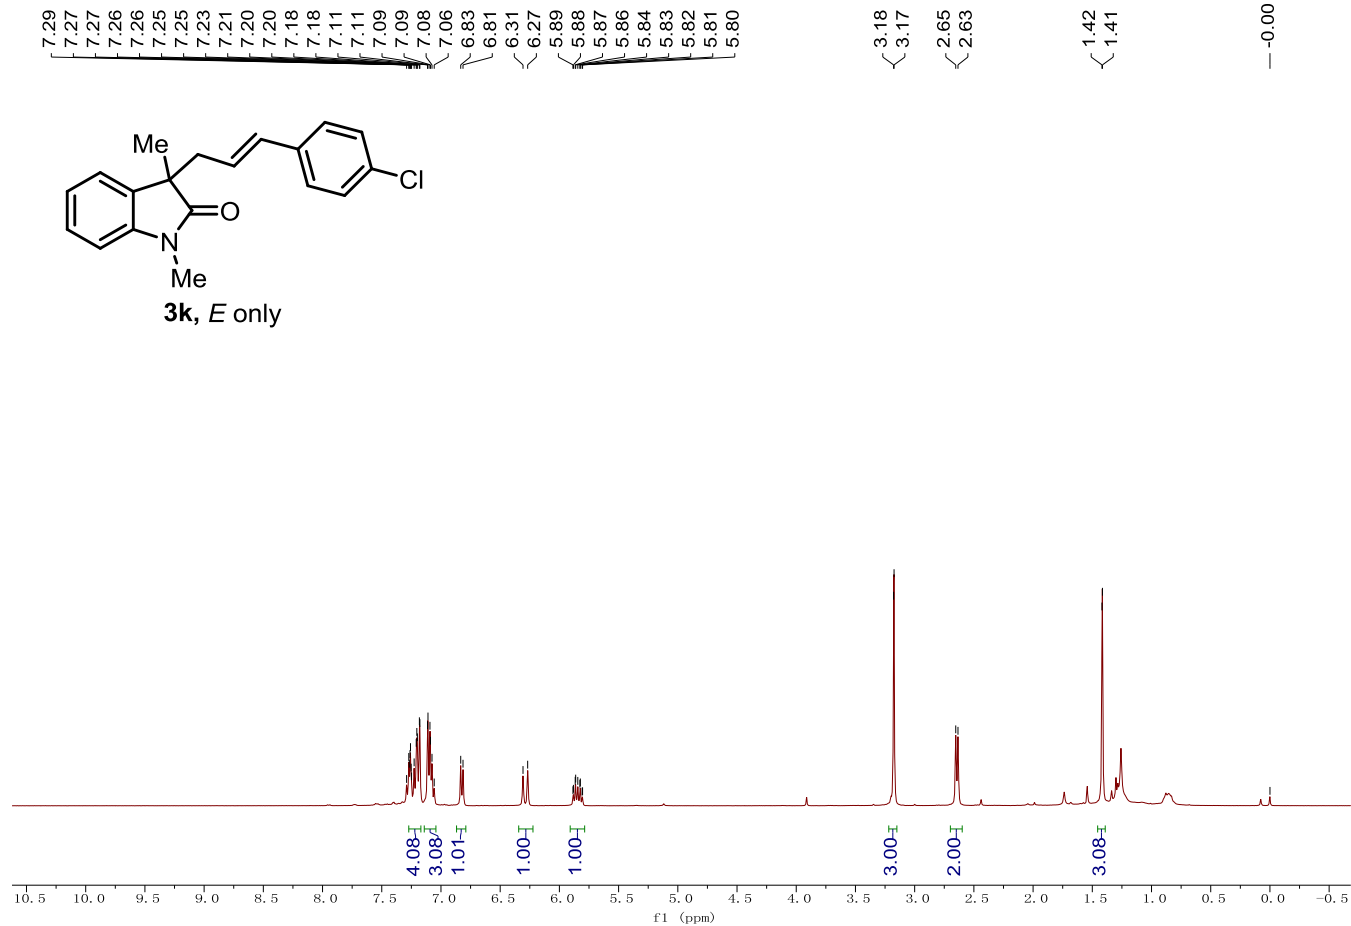

**3k, <sup>13</sup>C NMR (101 MHz, CDCl<sub>3</sub>)**

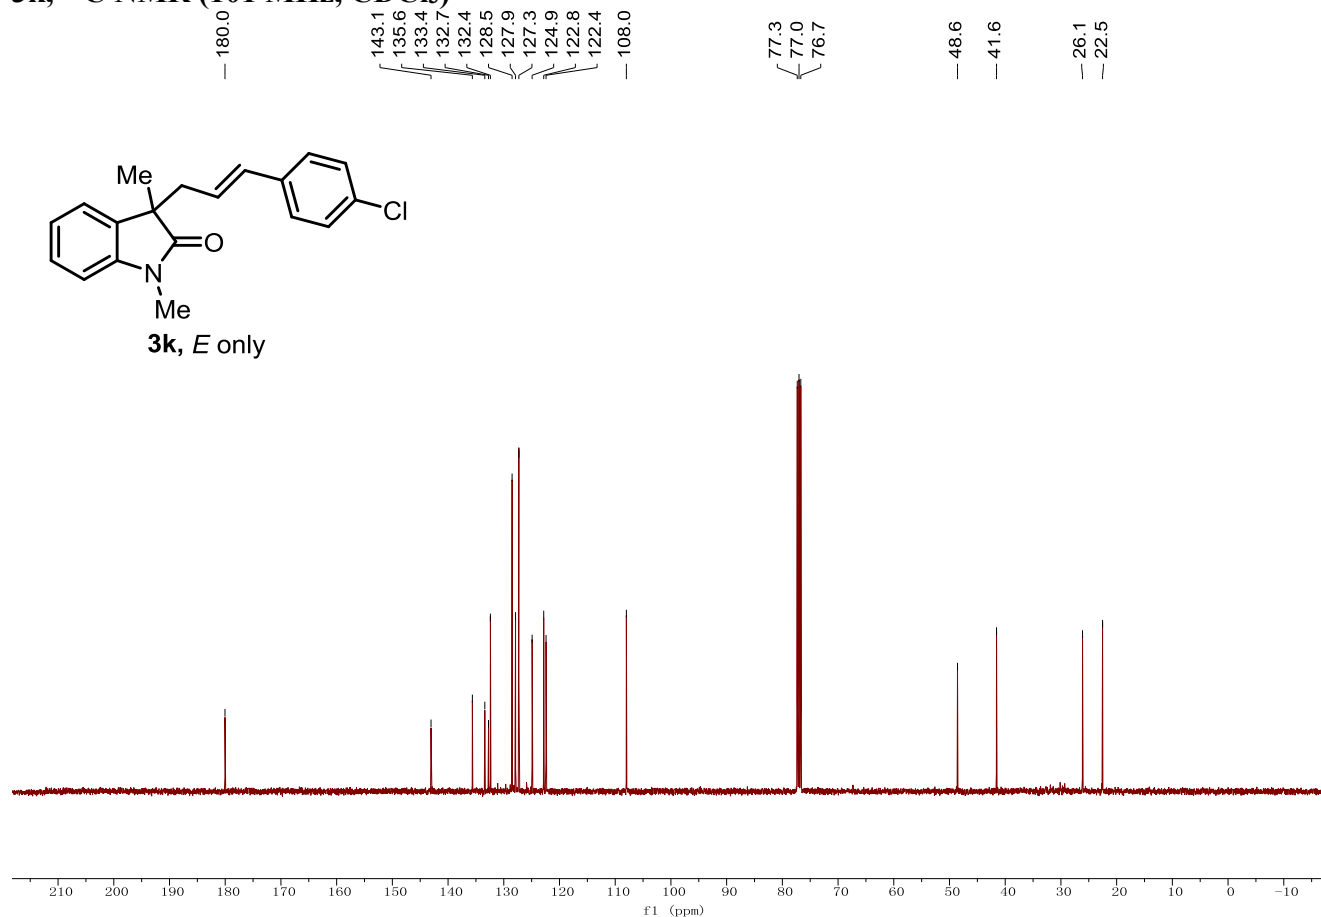

**3l, <sup>1</sup>H NMR (400 MHz, CDCl<sub>3</sub>)**

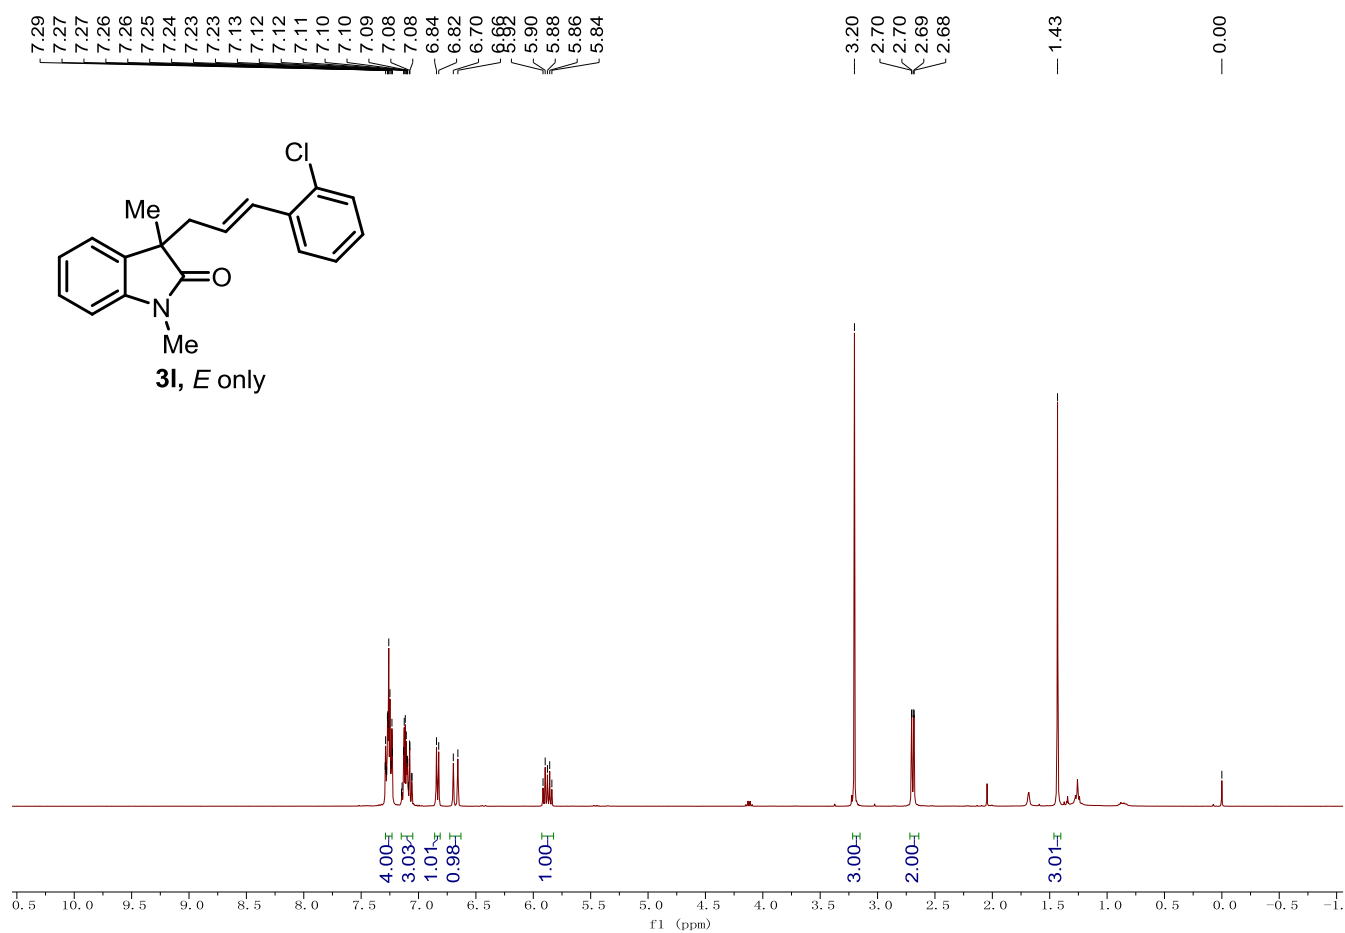

**3l, <sup>13</sup>C NMR (101 MHz, CDCl<sub>3</sub>)**

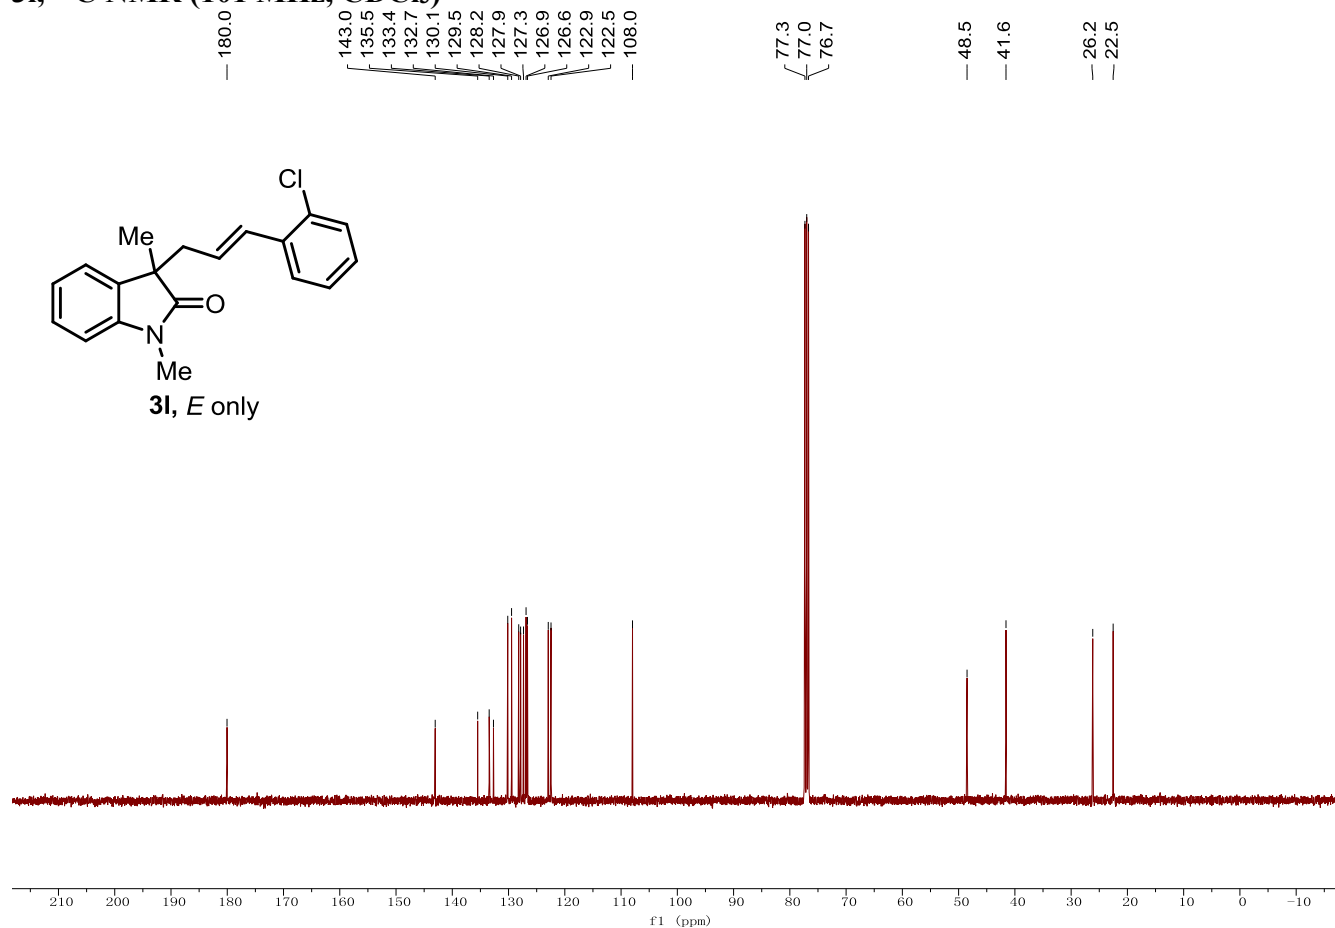

**3m, <sup>1</sup>H NMR (400 MHz, CDCl<sub>3</sub>)**

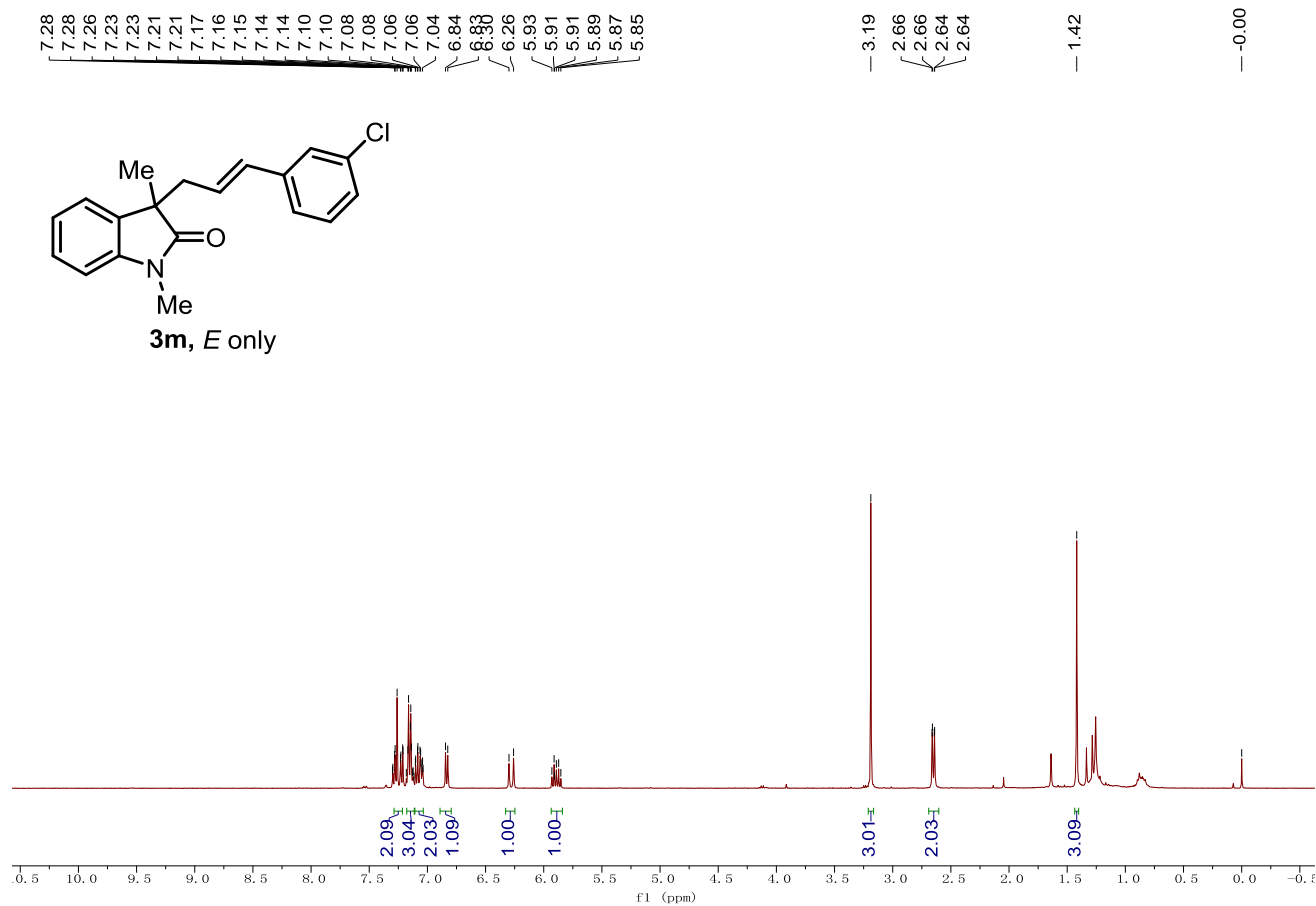

### 3m, <sup>13</sup>C NMR (101 MHz, CDCl<sub>3</sub>)

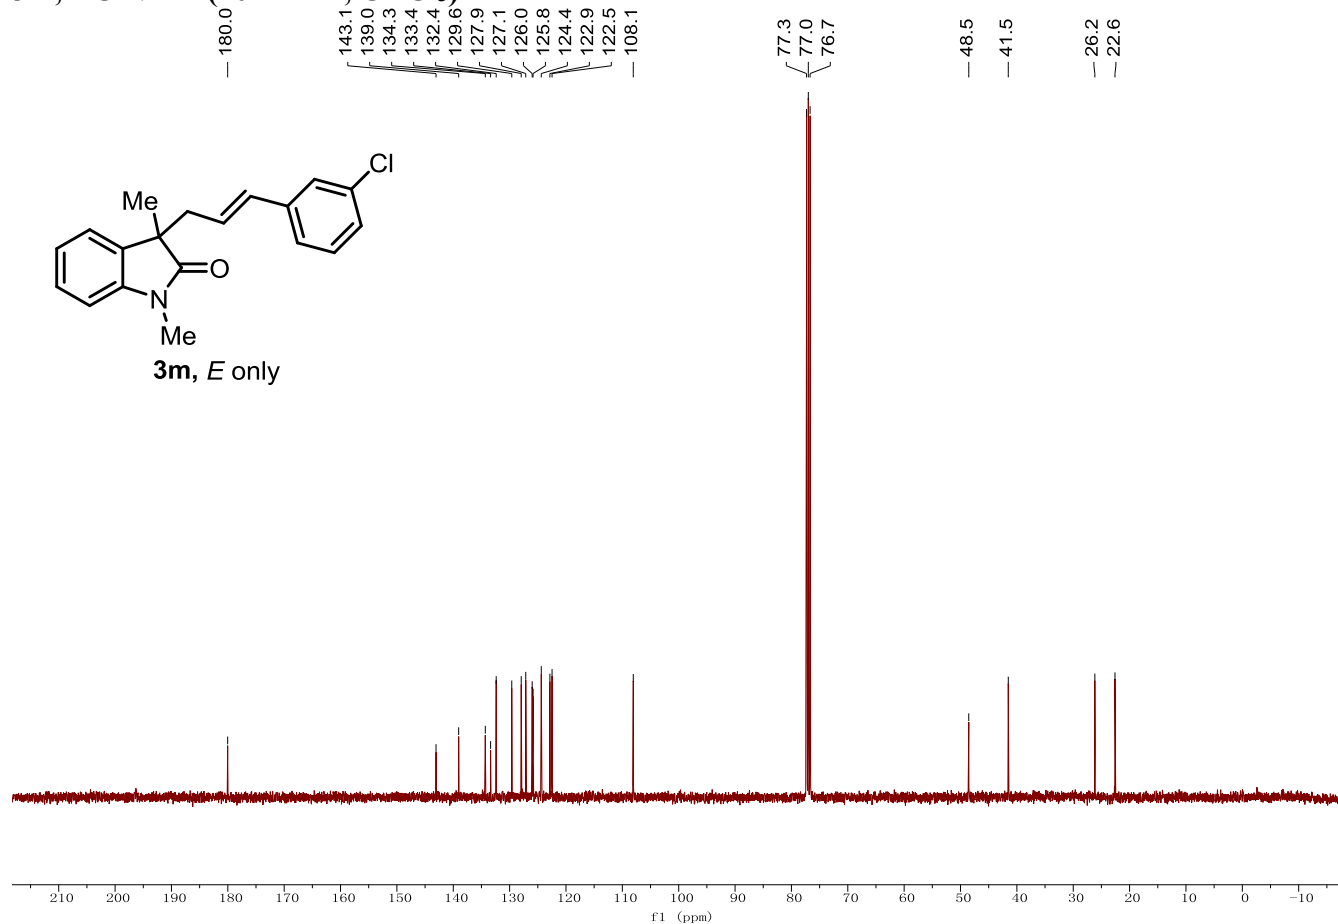

### 3n, <sup>1</sup>H NMR (400 MHz, CDCl<sub>3</sub>)

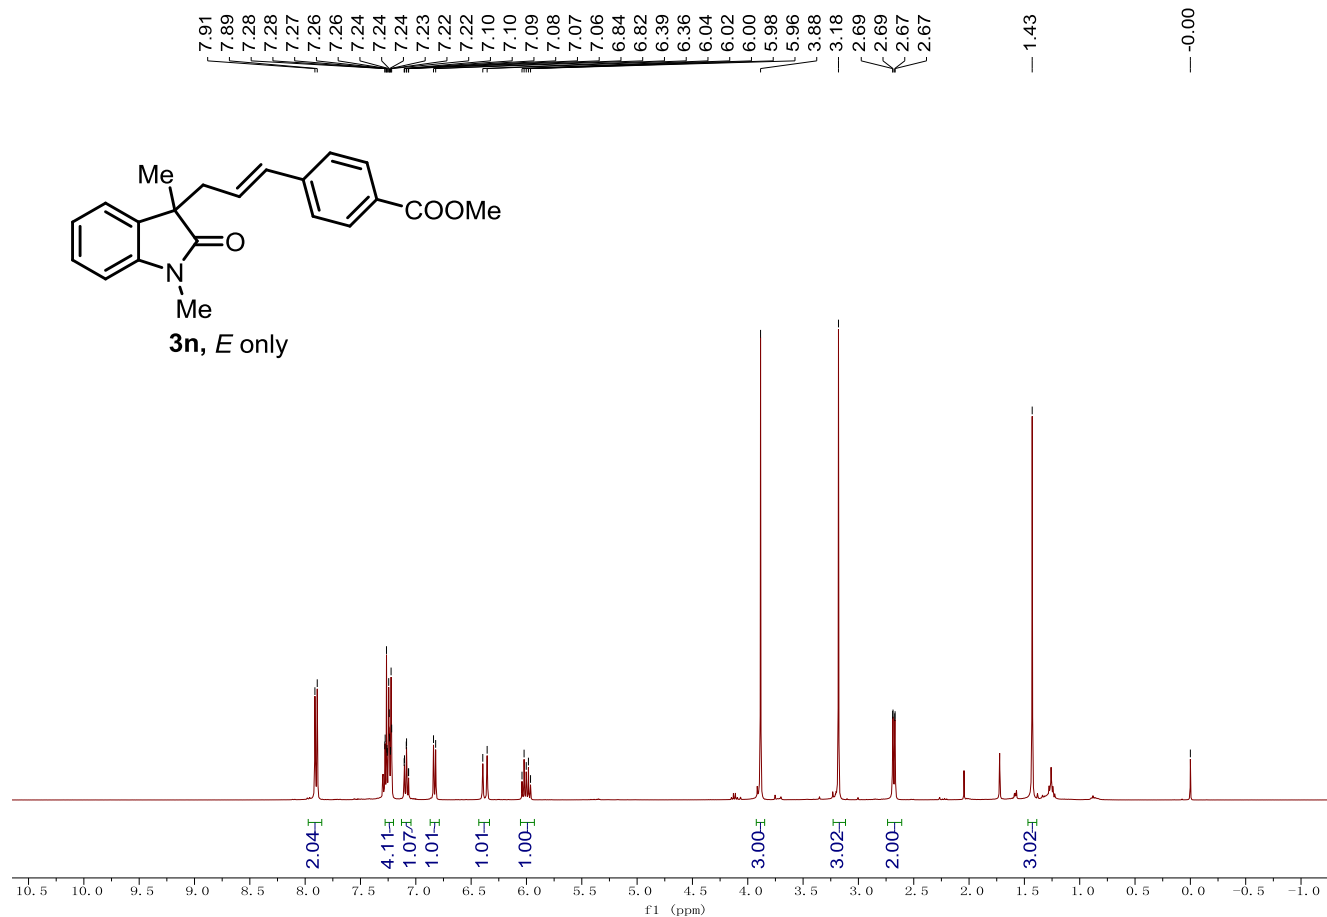



**3n, <sup>13</sup>C NMR (101 MHz, CDCl<sub>3</sub>)**

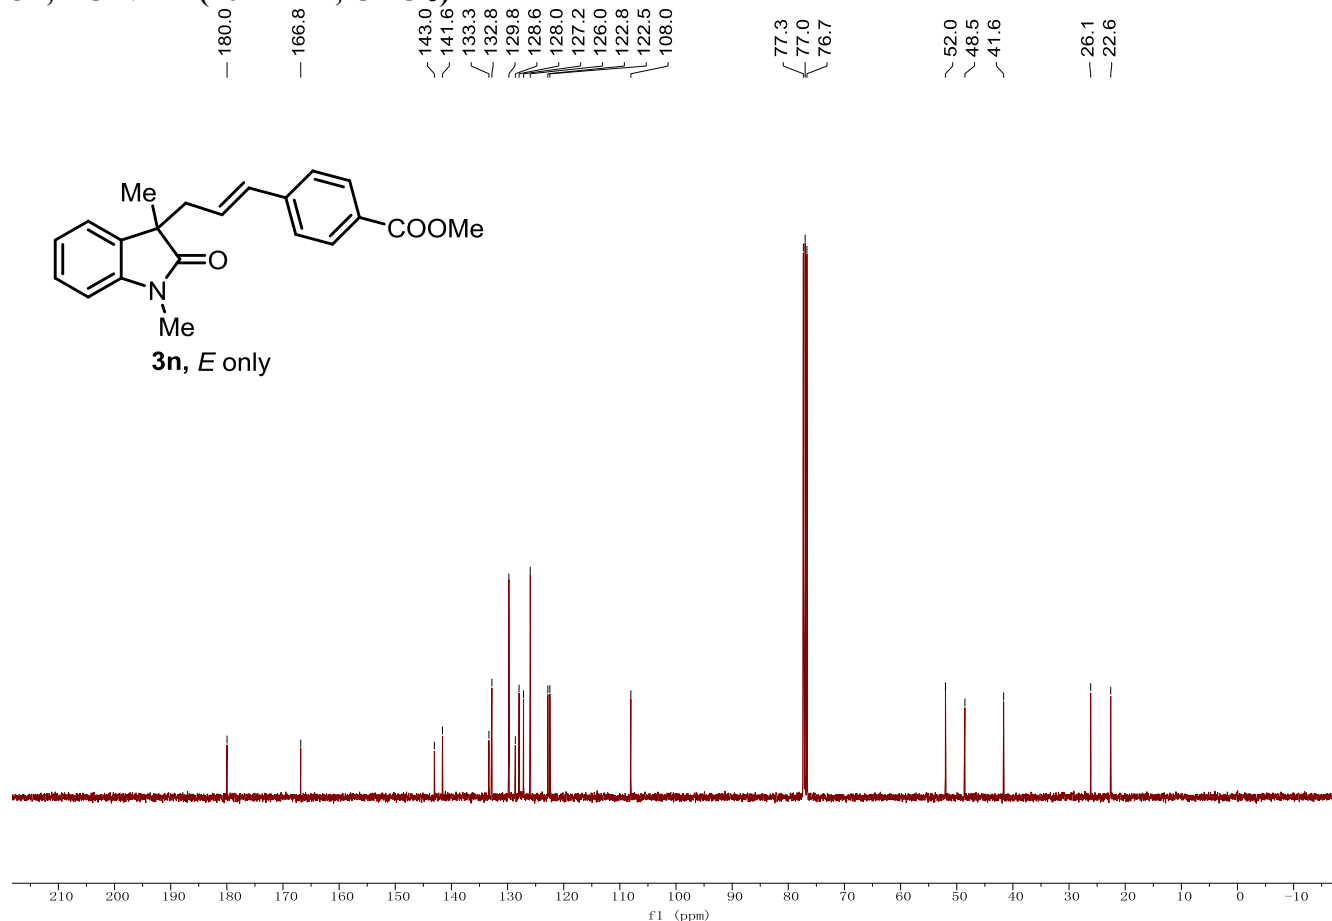

**3o, <sup>1</sup>H NMR (400 MHz, CDCl<sub>3</sub>)**

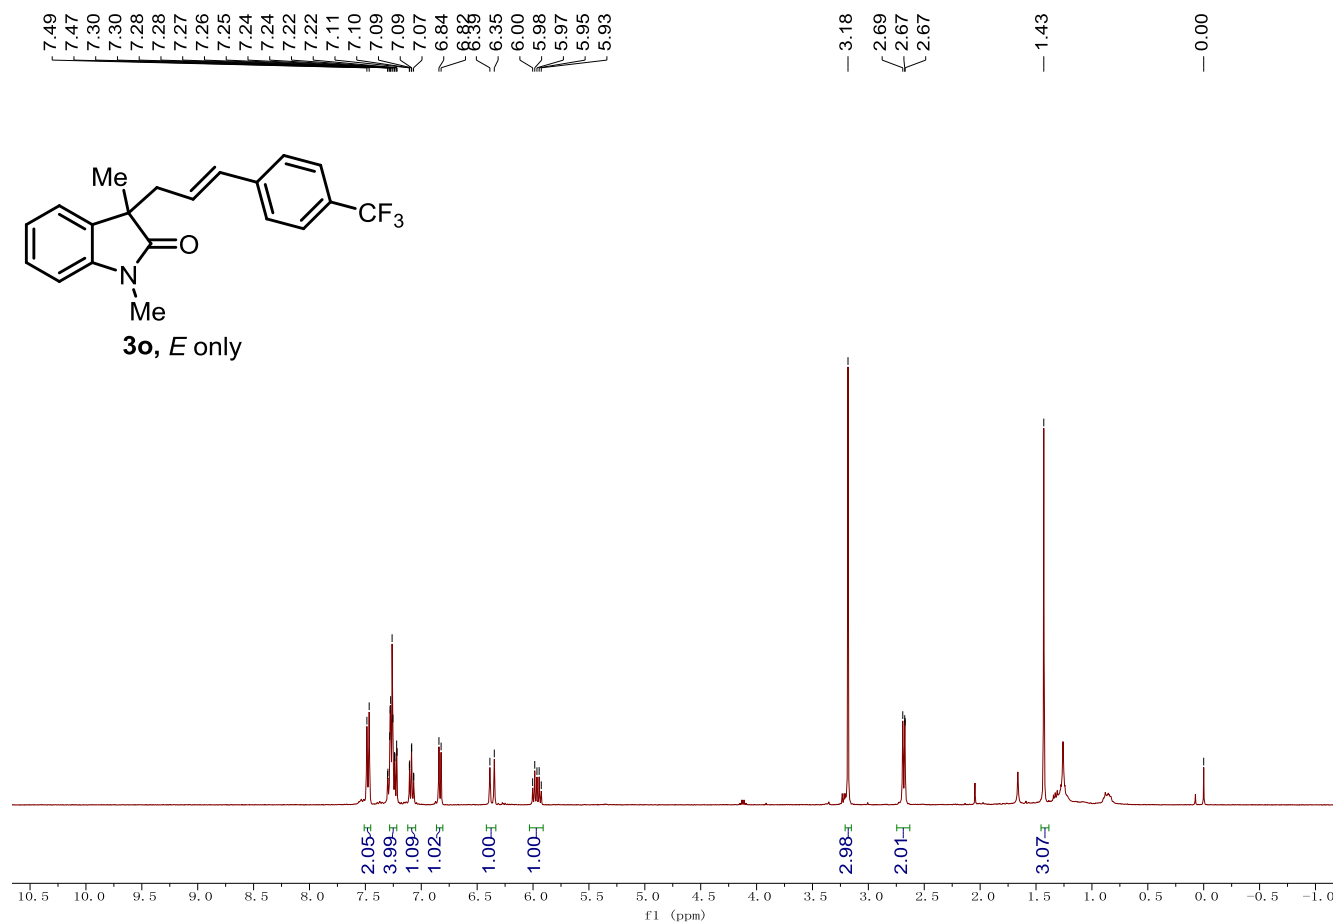

**30, <sup>13</sup>C NMR (101 MHz, CDCl<sub>3</sub>)**

180.0  
143.1  
140.6  
133.3  
132.4  
129.5  
129.1  
128.8  
128.5  
128.2  
128.0  
127.1  
126.2  
125.5  
125.4  
125.4  
125.3  
125.3  
122.8  
122.5  
120.1  
108.1

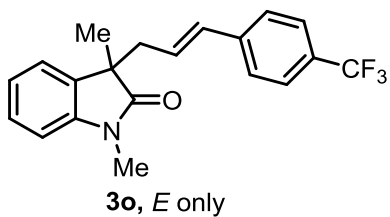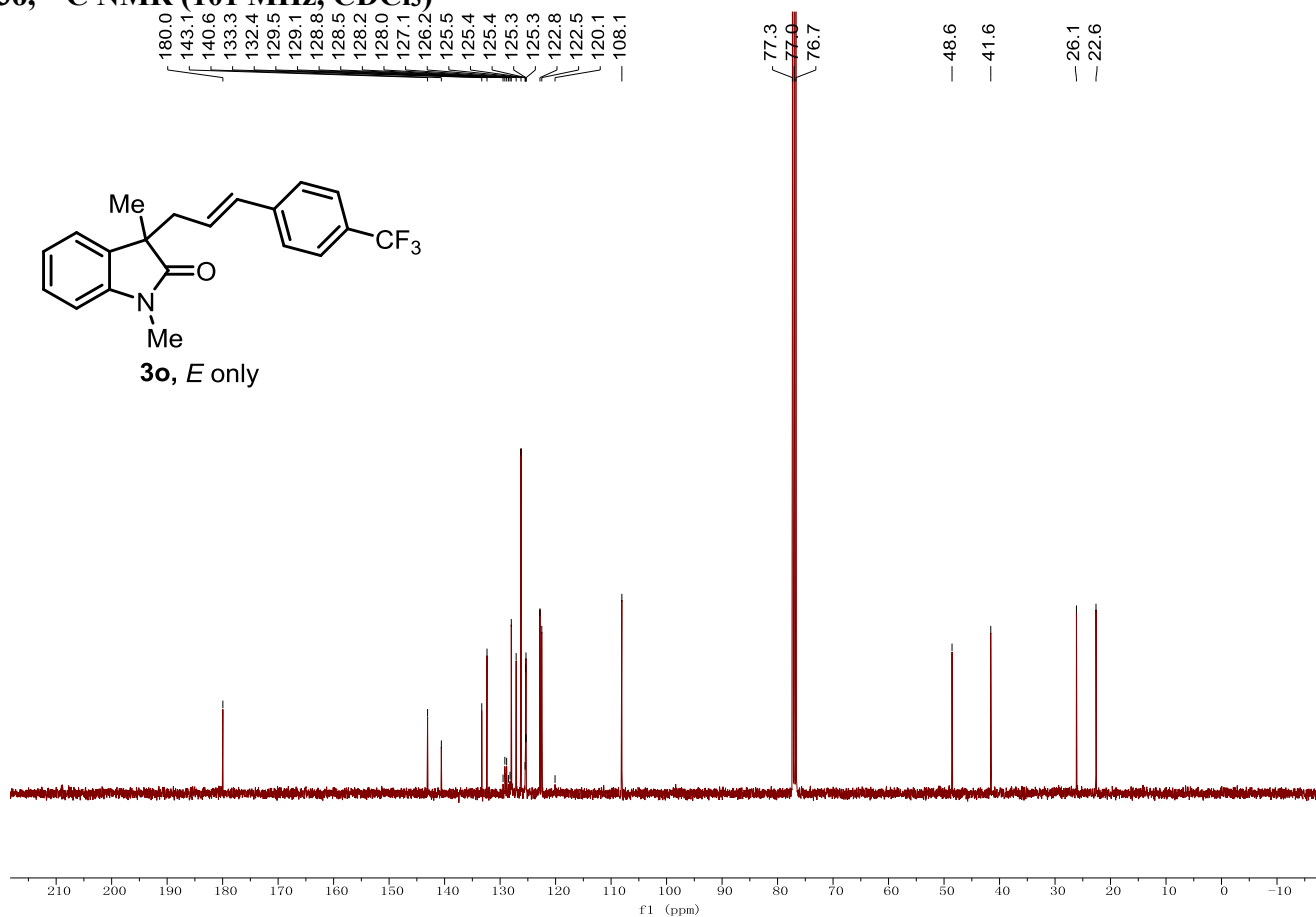

**30, <sup>19</sup>F NMR (101 MHz, CDCl<sub>3</sub>)**

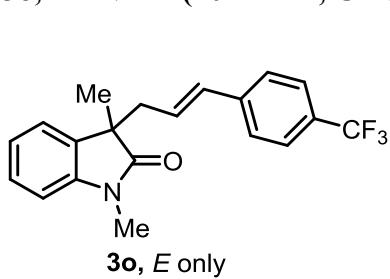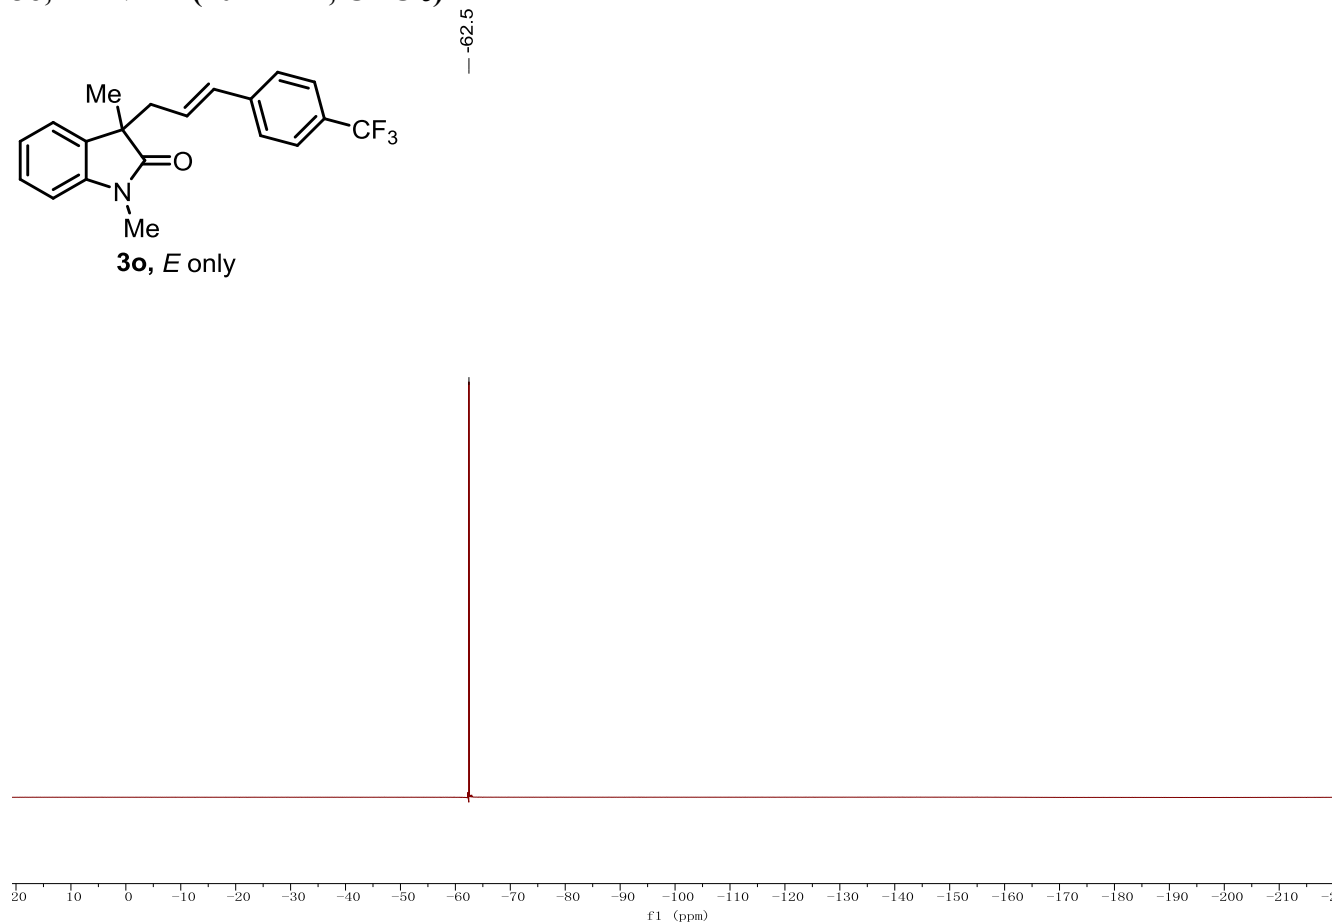

**3p, <sup>1</sup>H NMR (400 MHz, CDCl<sub>3</sub>)**

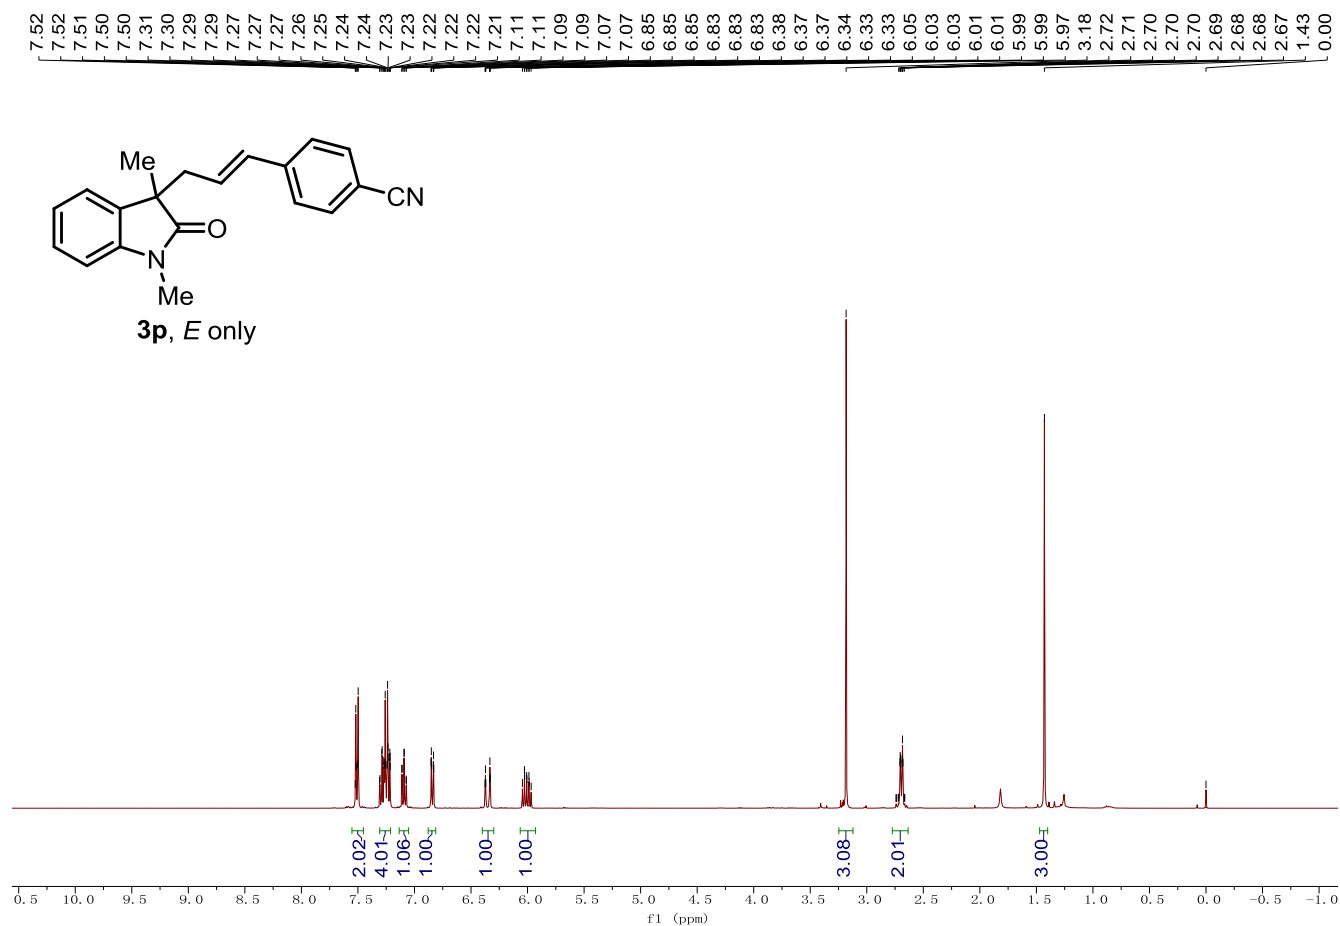

**3p, <sup>13</sup>C NMR (101 MHz, CDCl<sub>3</sub>)**

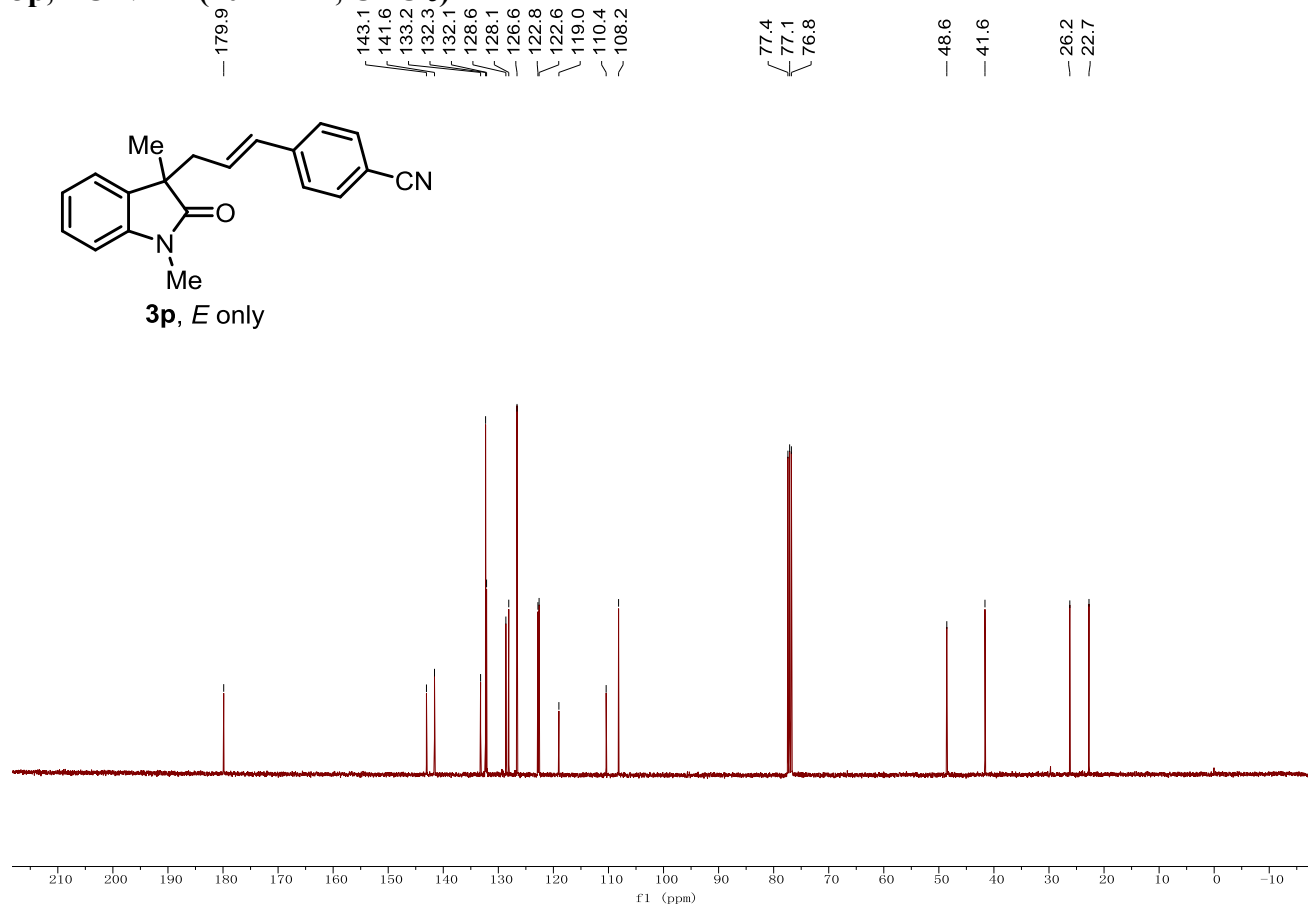

### 3q, <sup>1</sup>H NMR (400 MHz, CDCl<sub>3</sub>)

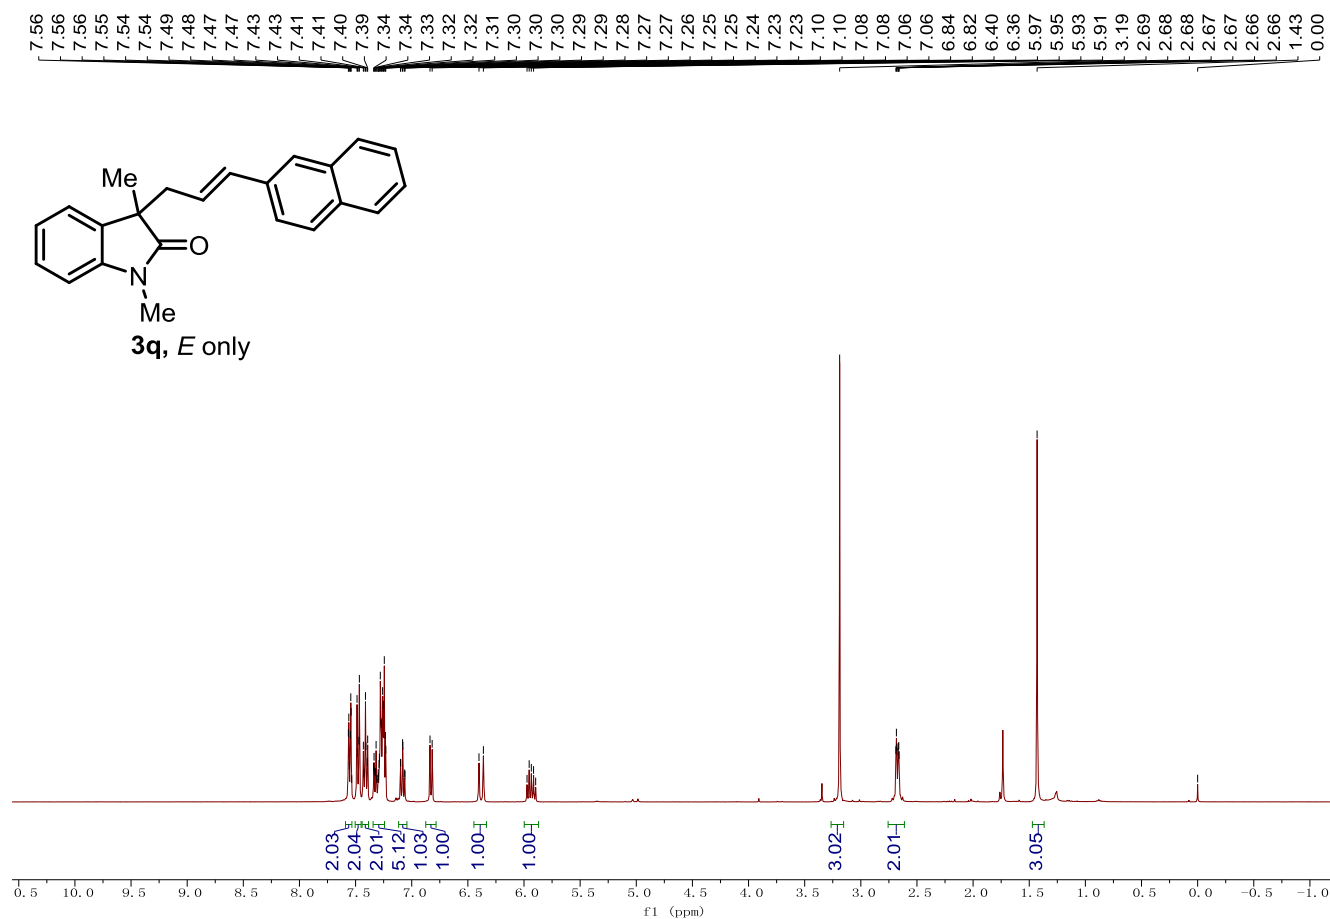

### 3q, <sup>13</sup>C NMR (101 MHz, CDCl<sub>3</sub>)

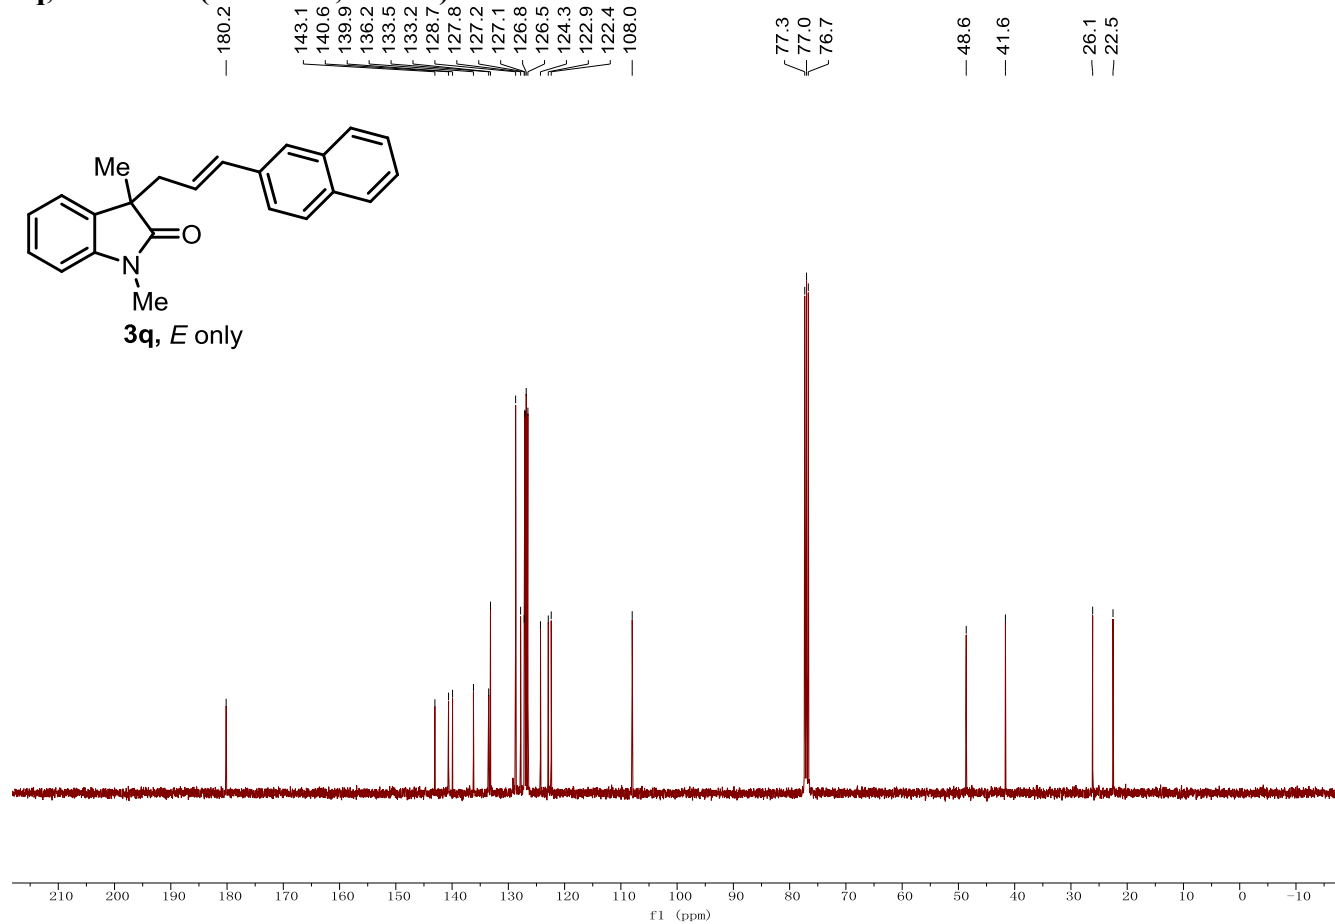

**3r, <sup>1</sup>H NMR (400 MHz, CDCl<sub>3</sub>)**

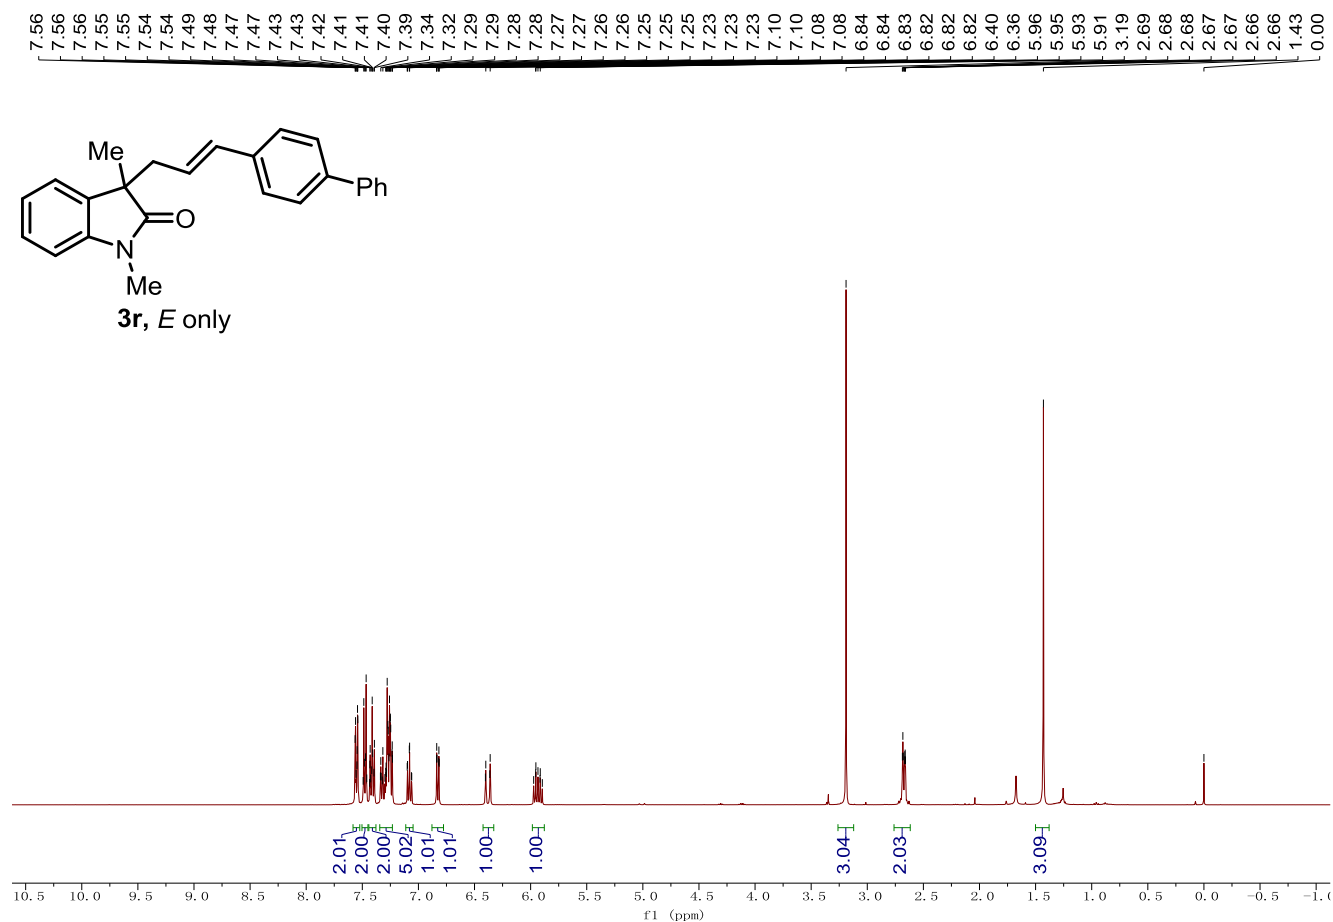

**3r, <sup>13</sup>C NMR (101 MHz, CDCl<sub>3</sub>)**

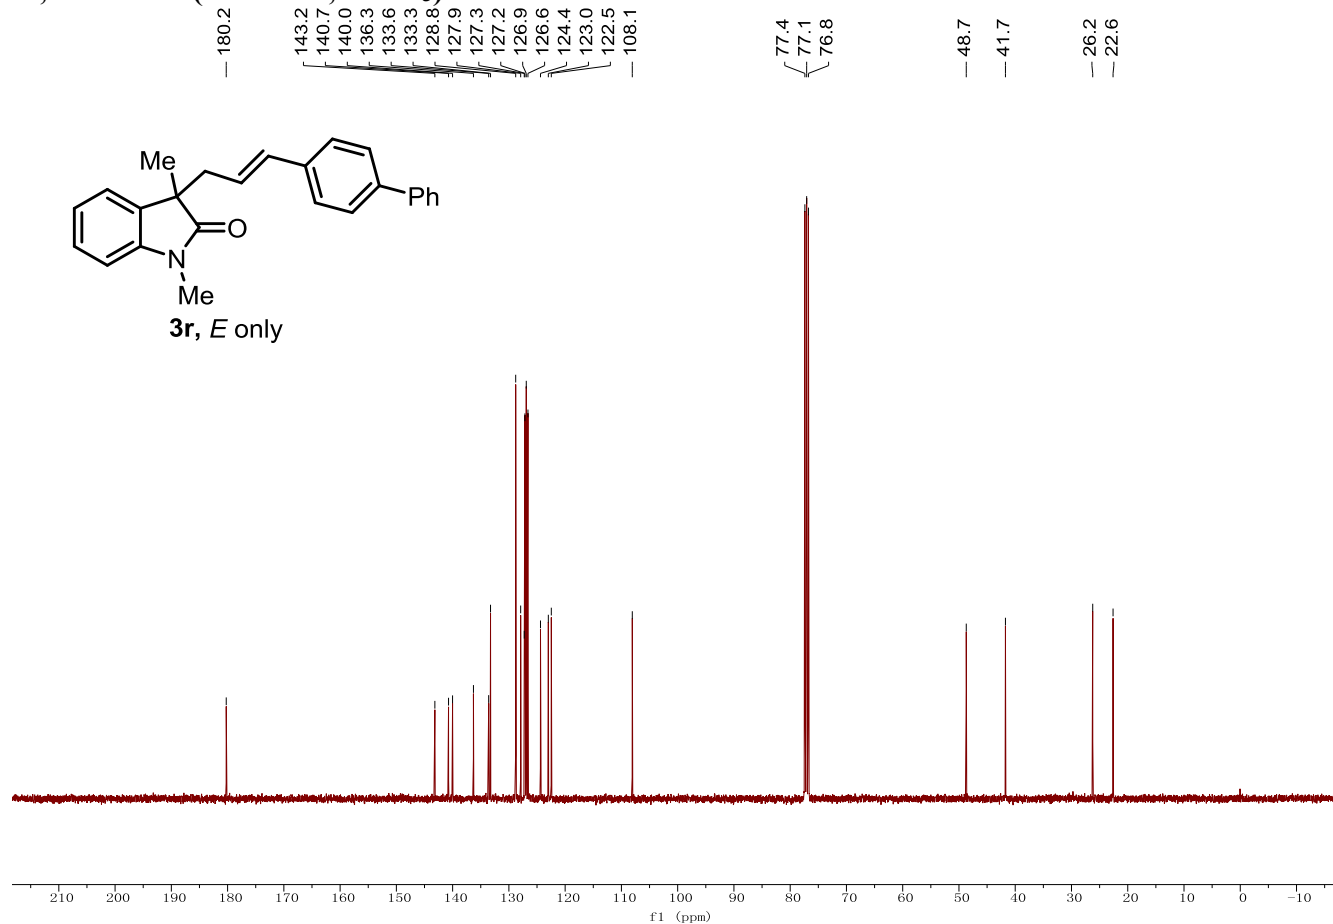

**3s, <sup>1</sup>H NMR (400 MHz, CDCl<sub>3</sub>)**

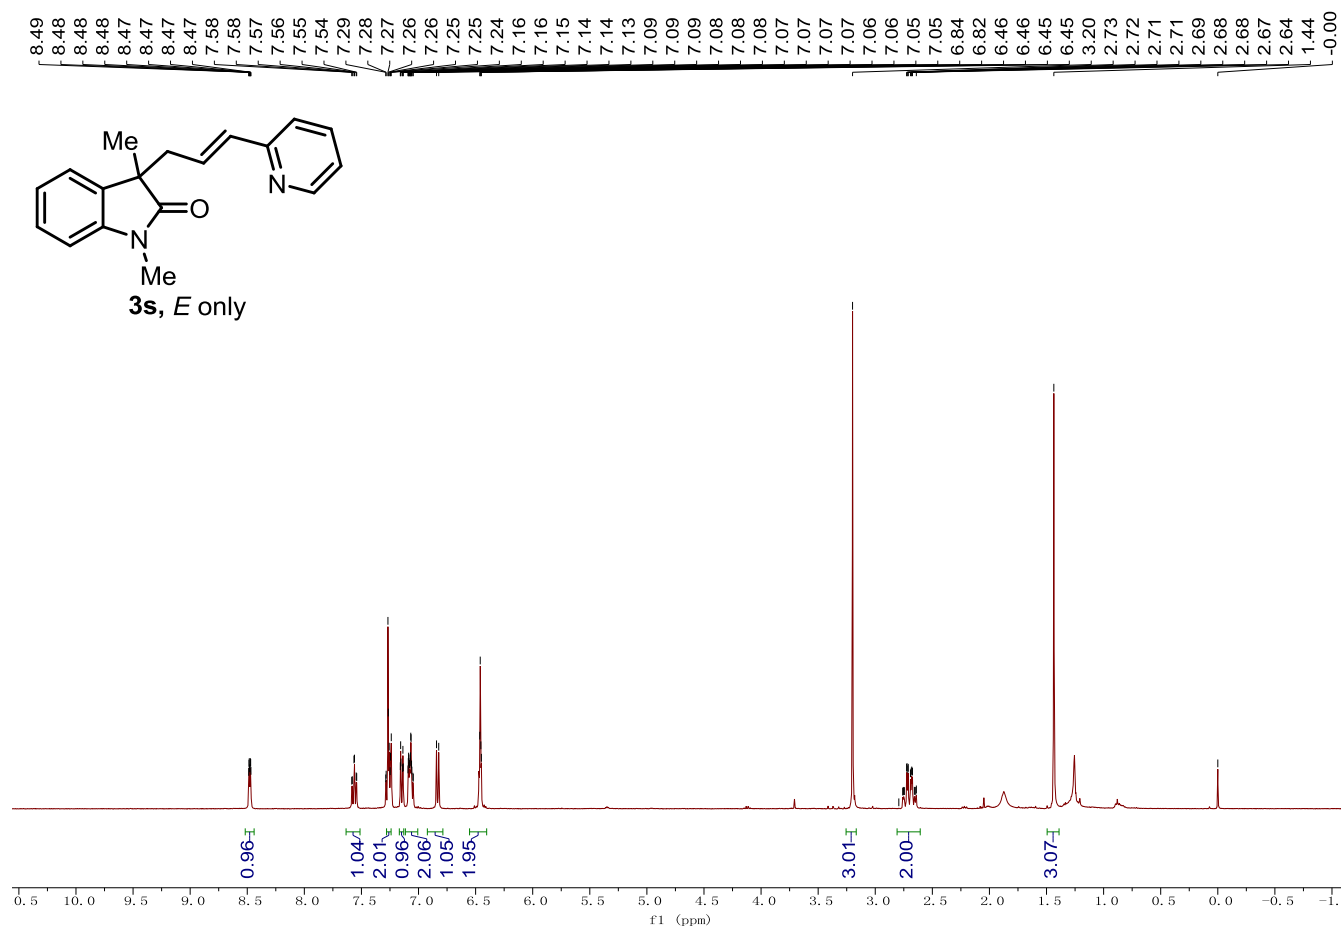

**3s, <sup>13</sup>C NMR (101 MHz, CDCl<sub>3</sub>)**

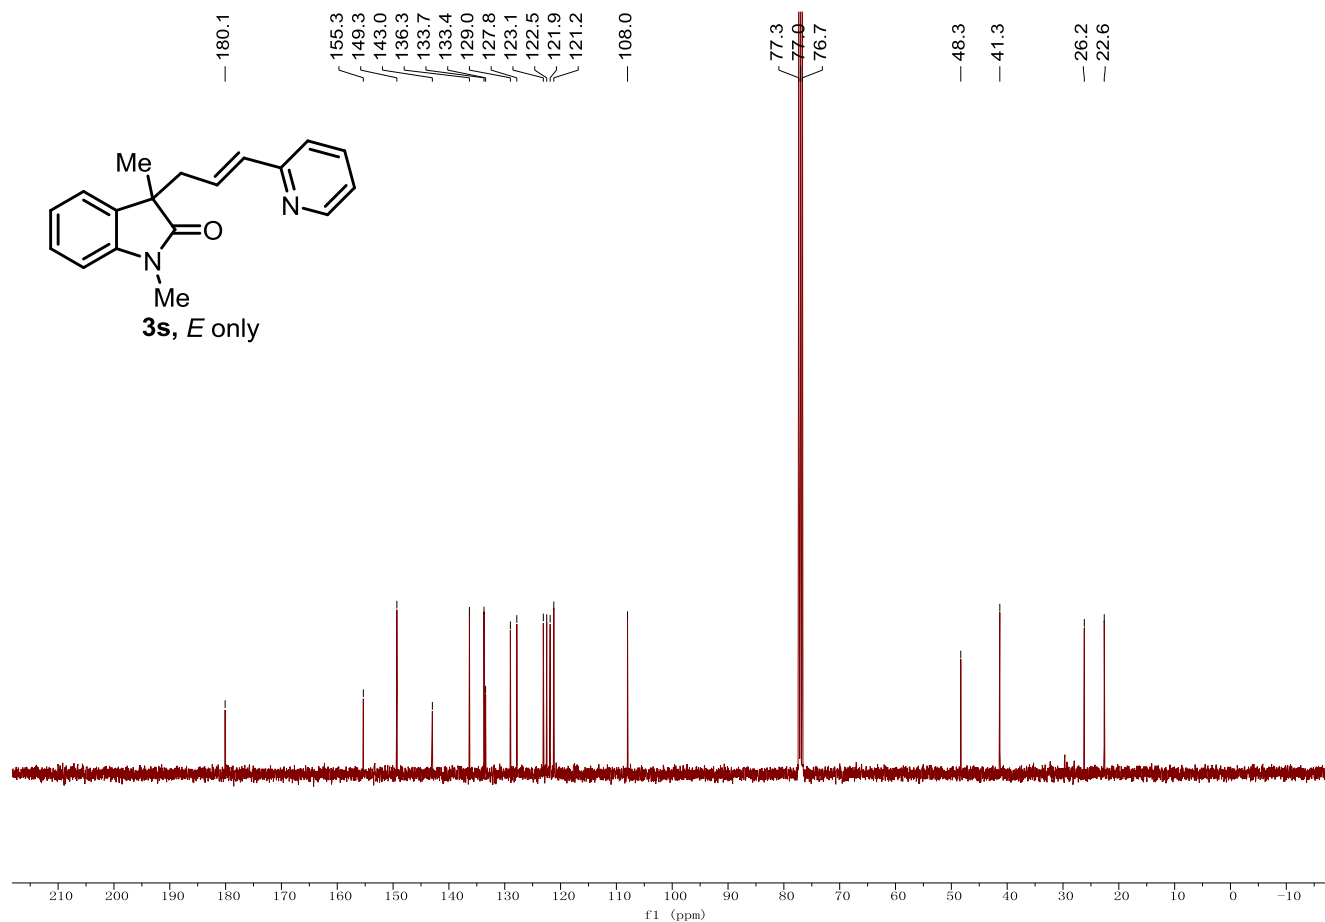

### 3t, <sup>1</sup>H NMR (400 MHz, CDCl<sub>3</sub>)

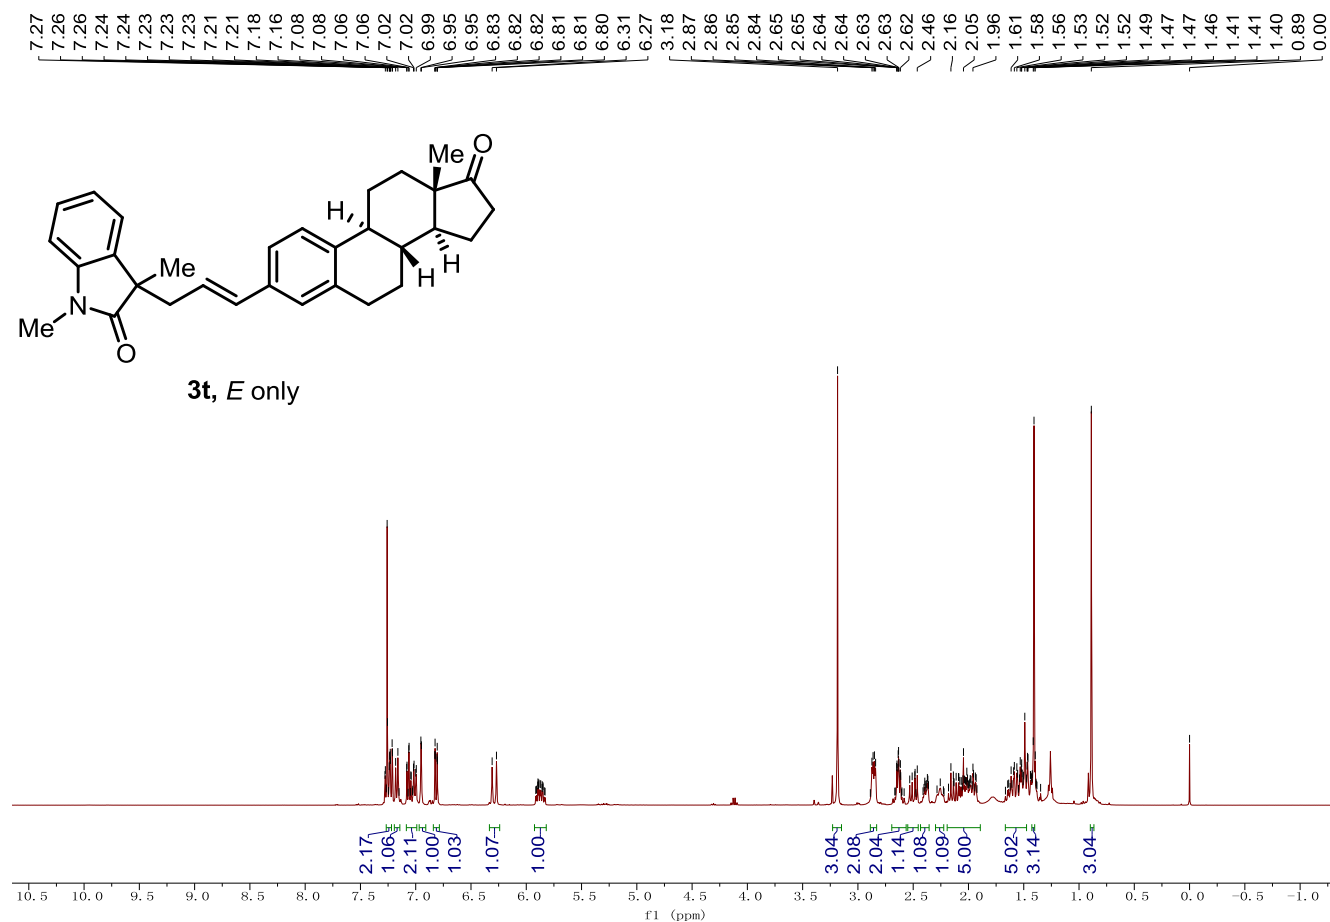

### 3t, <sup>13</sup>C NMR (101 MHz, CDCl<sub>3</sub>)

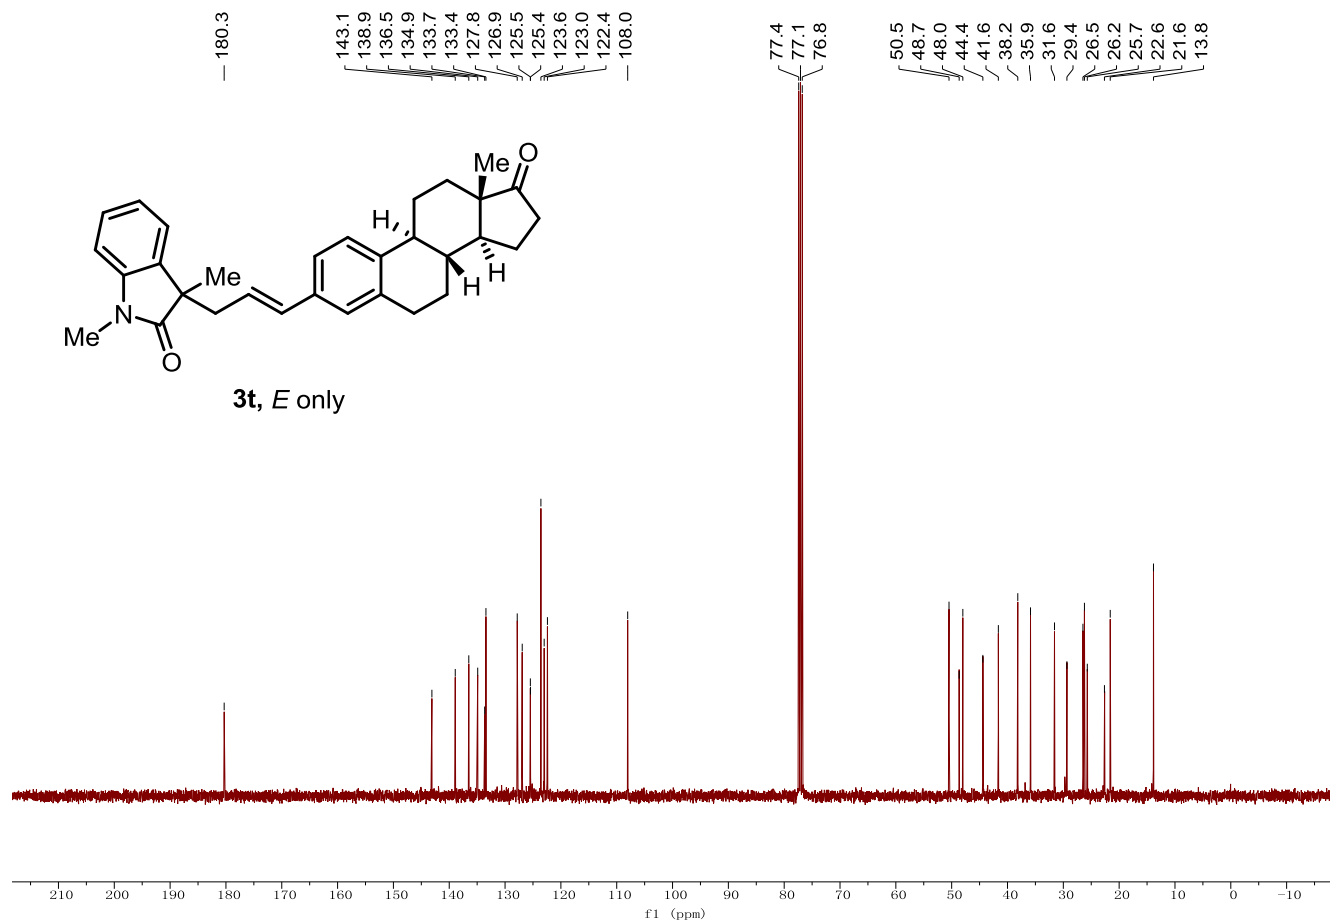

### 3u, <sup>1</sup>H NMR (400 MHz, CDCl<sub>3</sub>)

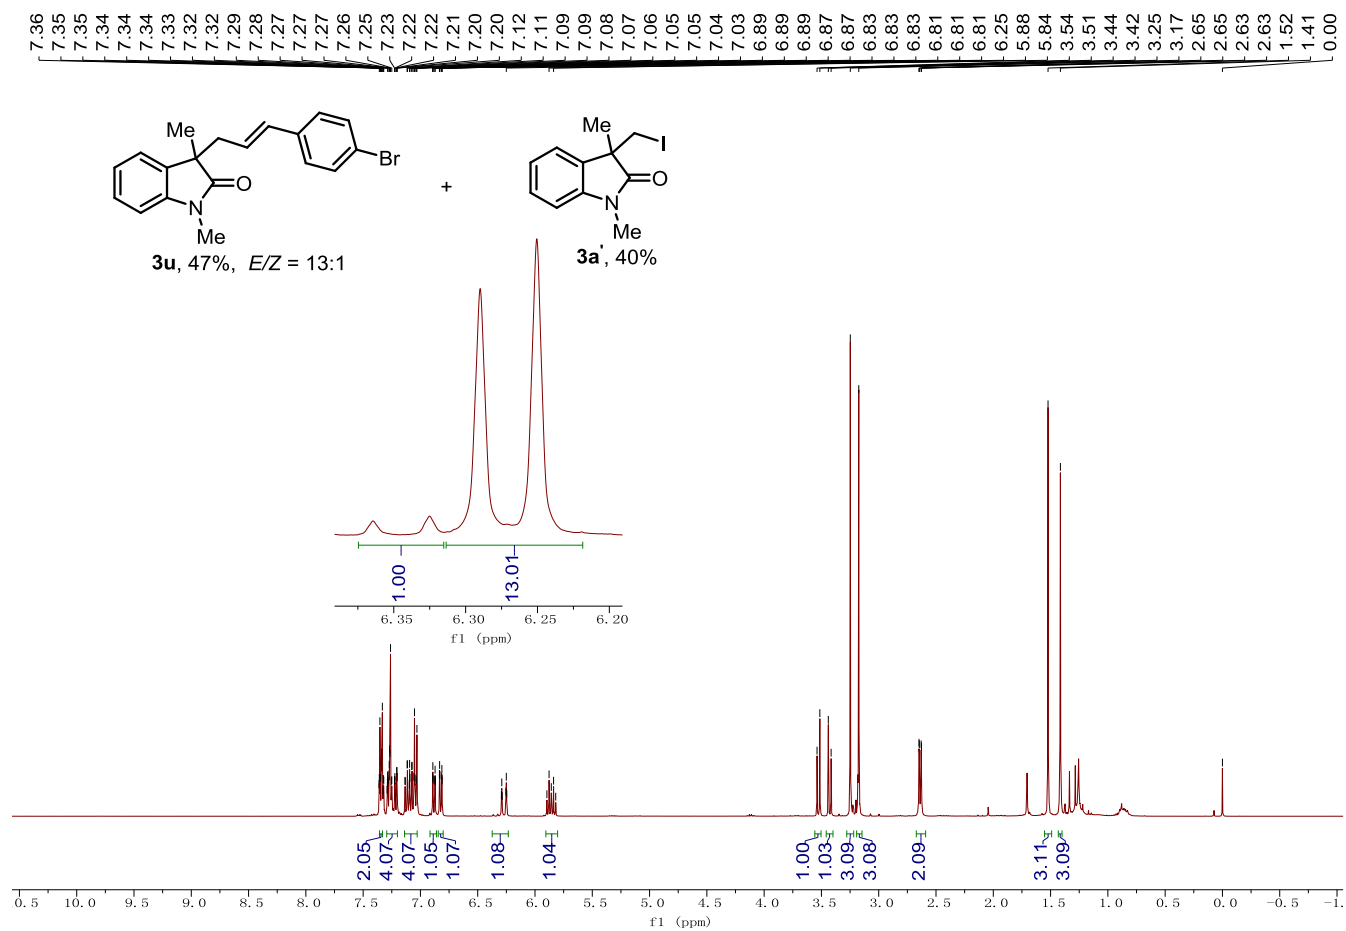

### 3u, <sup>13</sup>C NMR (101 MHz, CDCl<sub>3</sub>)

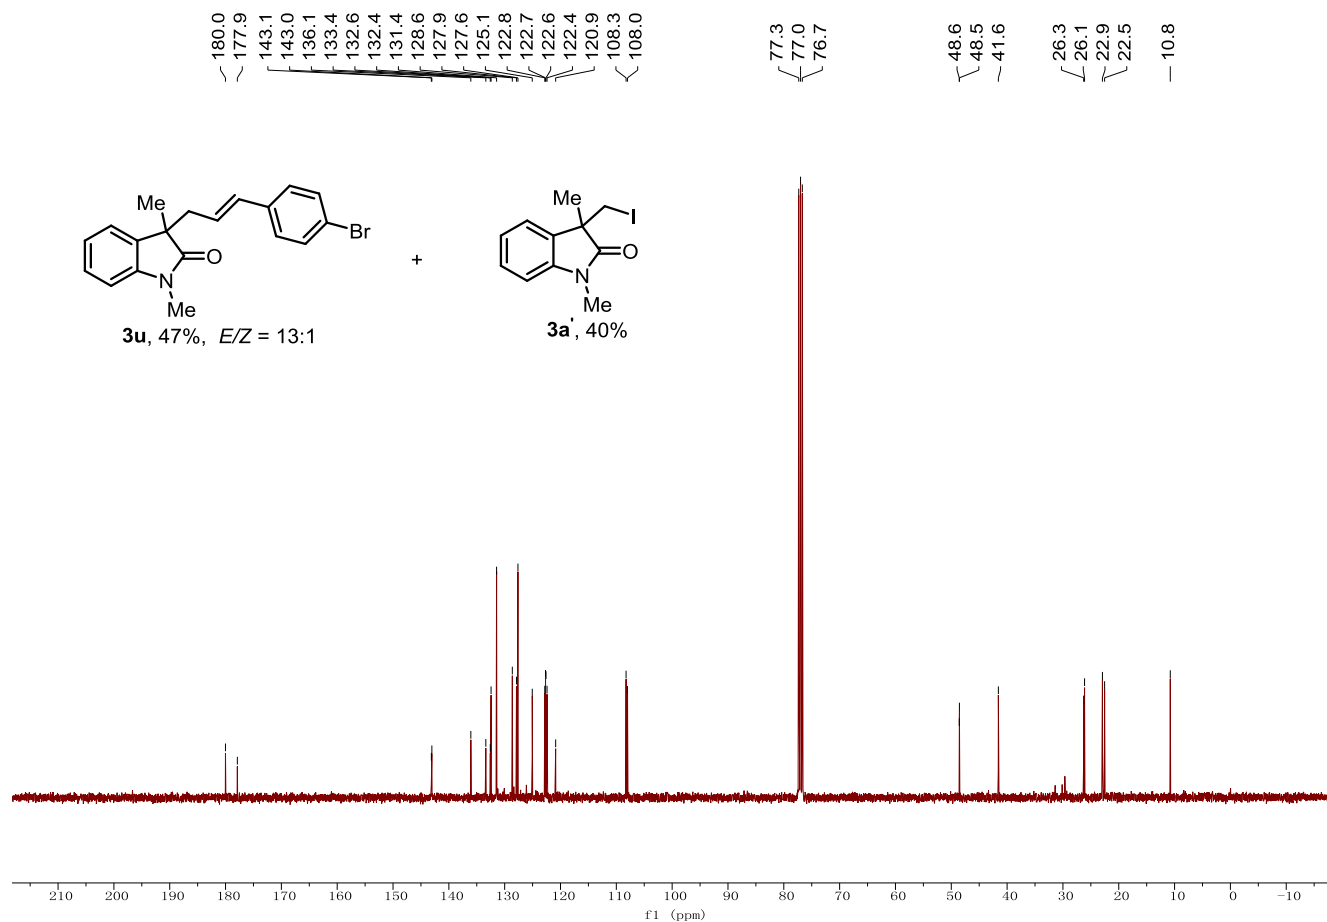



### 3v, <sup>1</sup>H NMR (400 MHz, CDCl<sub>3</sub>)

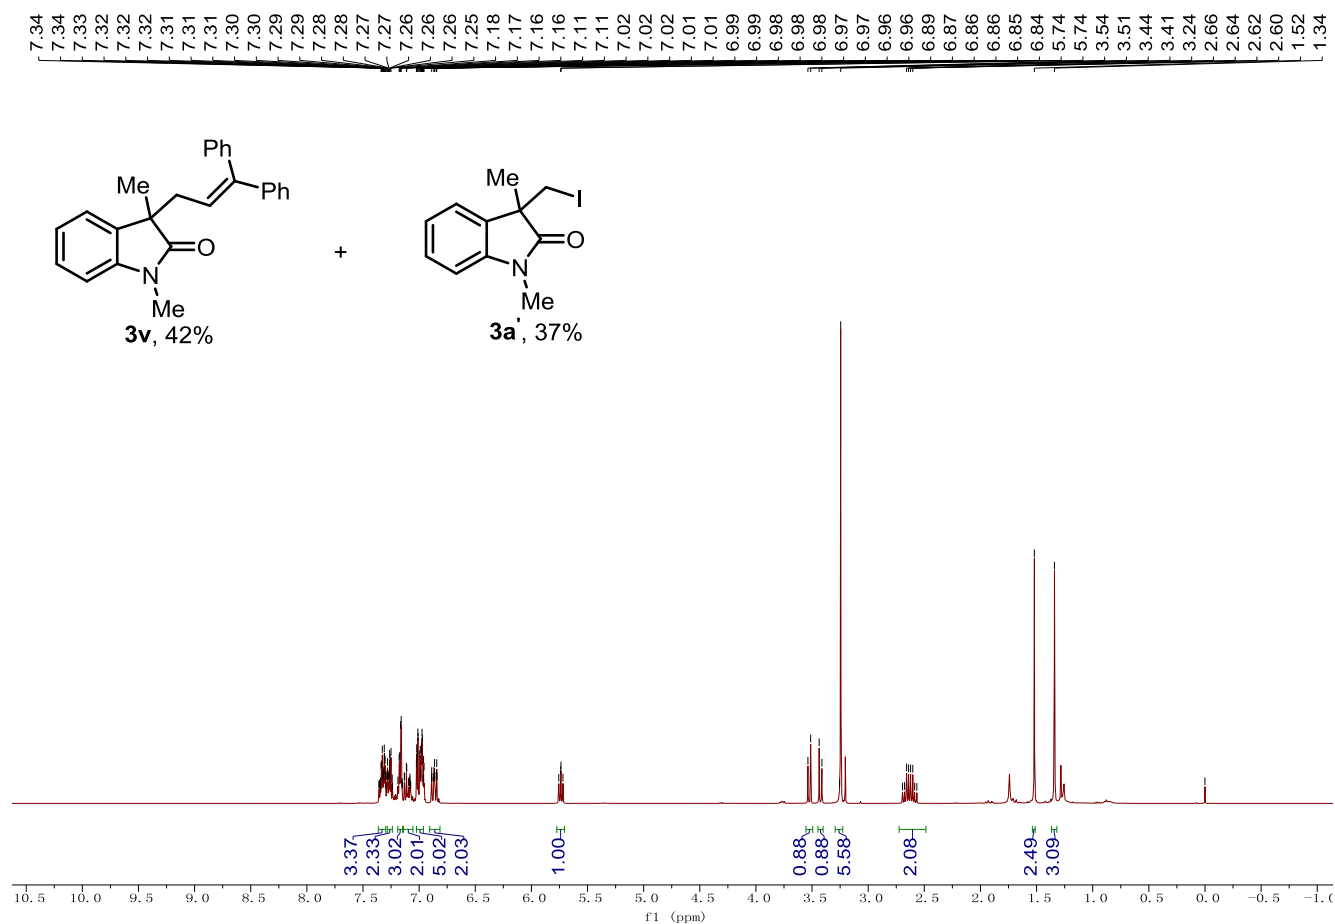

### 3v, <sup>13</sup>C NMR (101 MHz, CDCl<sub>3</sub>)

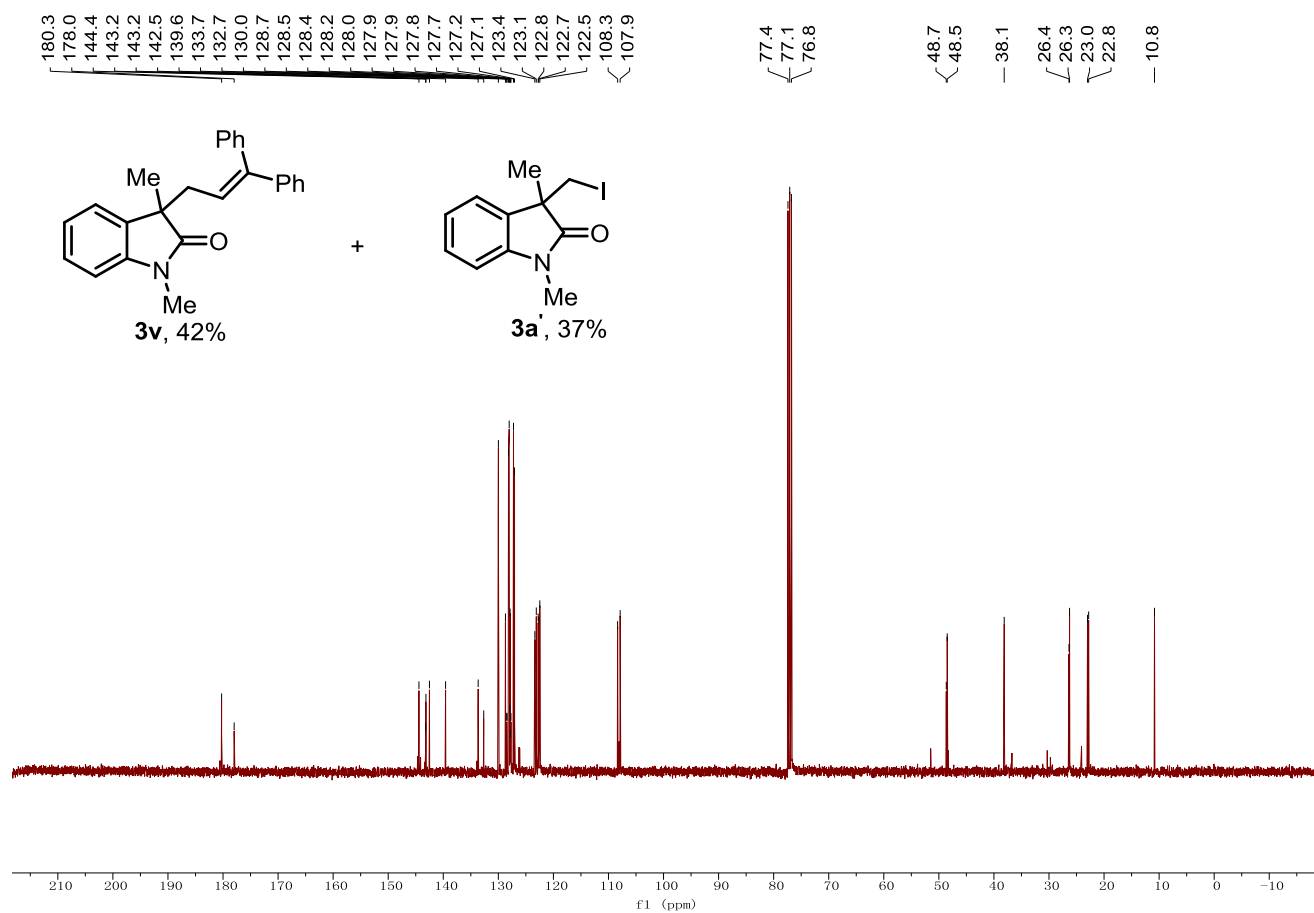

**3w, <sup>1</sup>H NMR (400 MHz, CDCl<sub>3</sub>)**

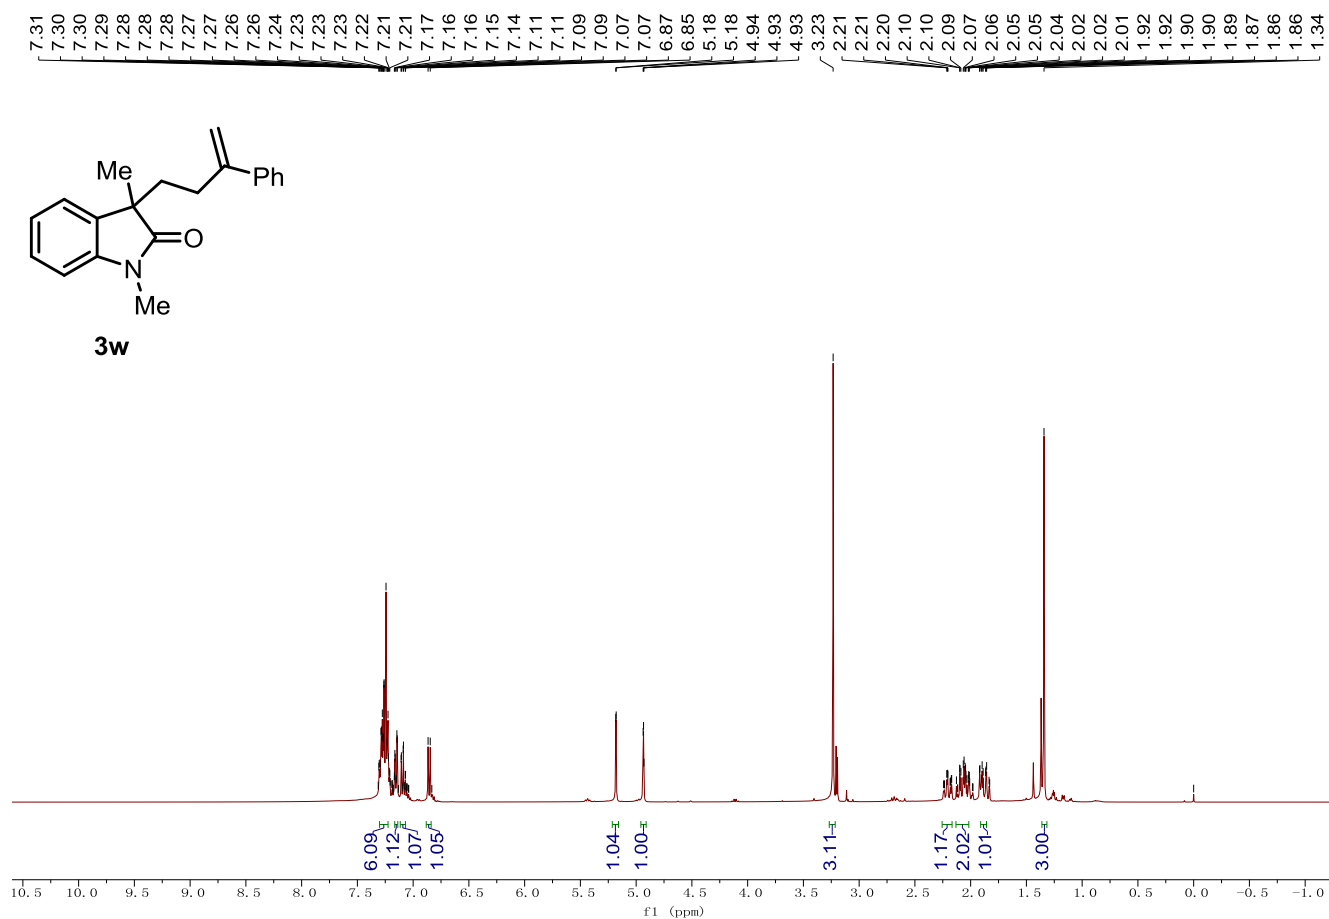

**3w, <sup>13</sup>C NMR (101 MHz, CDCl<sub>3</sub>)**

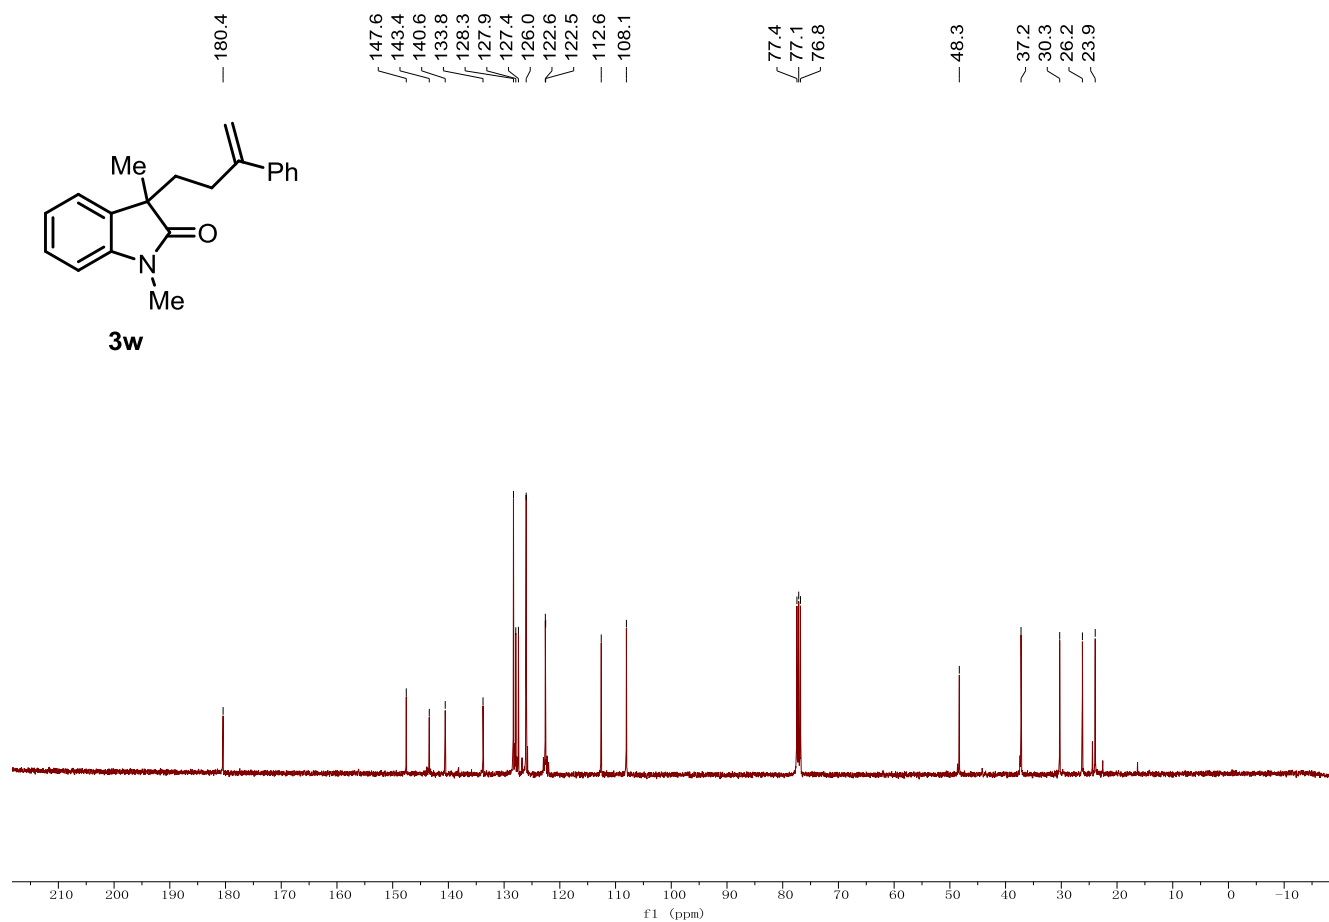

**4a, <sup>1</sup>H NMR (400 MHz, CDCl<sub>3</sub>)**

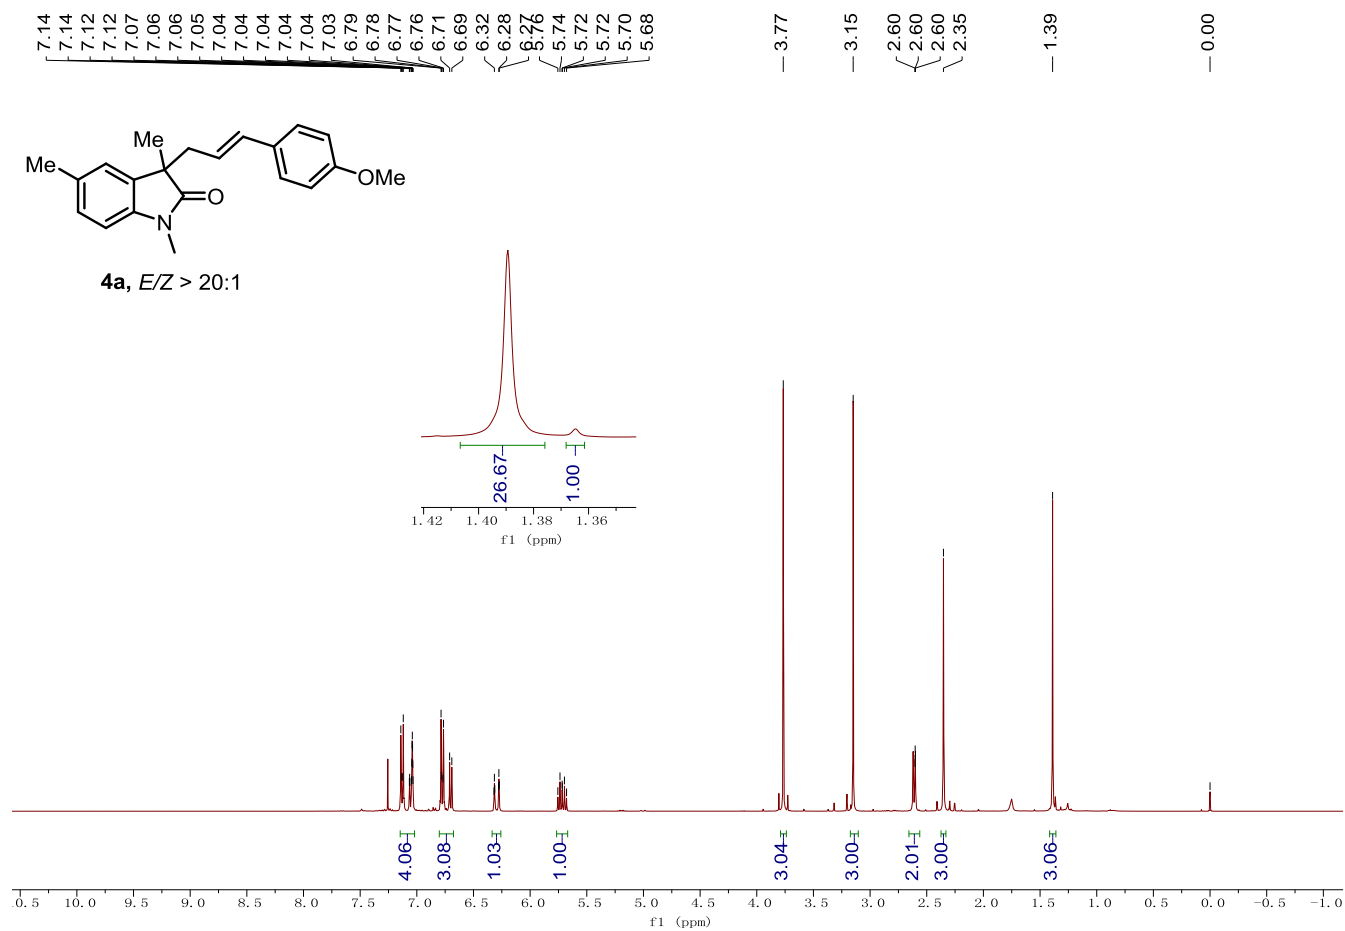

**4a, <sup>13</sup>C NMR (101 MHz, CDCl<sub>3</sub>)**

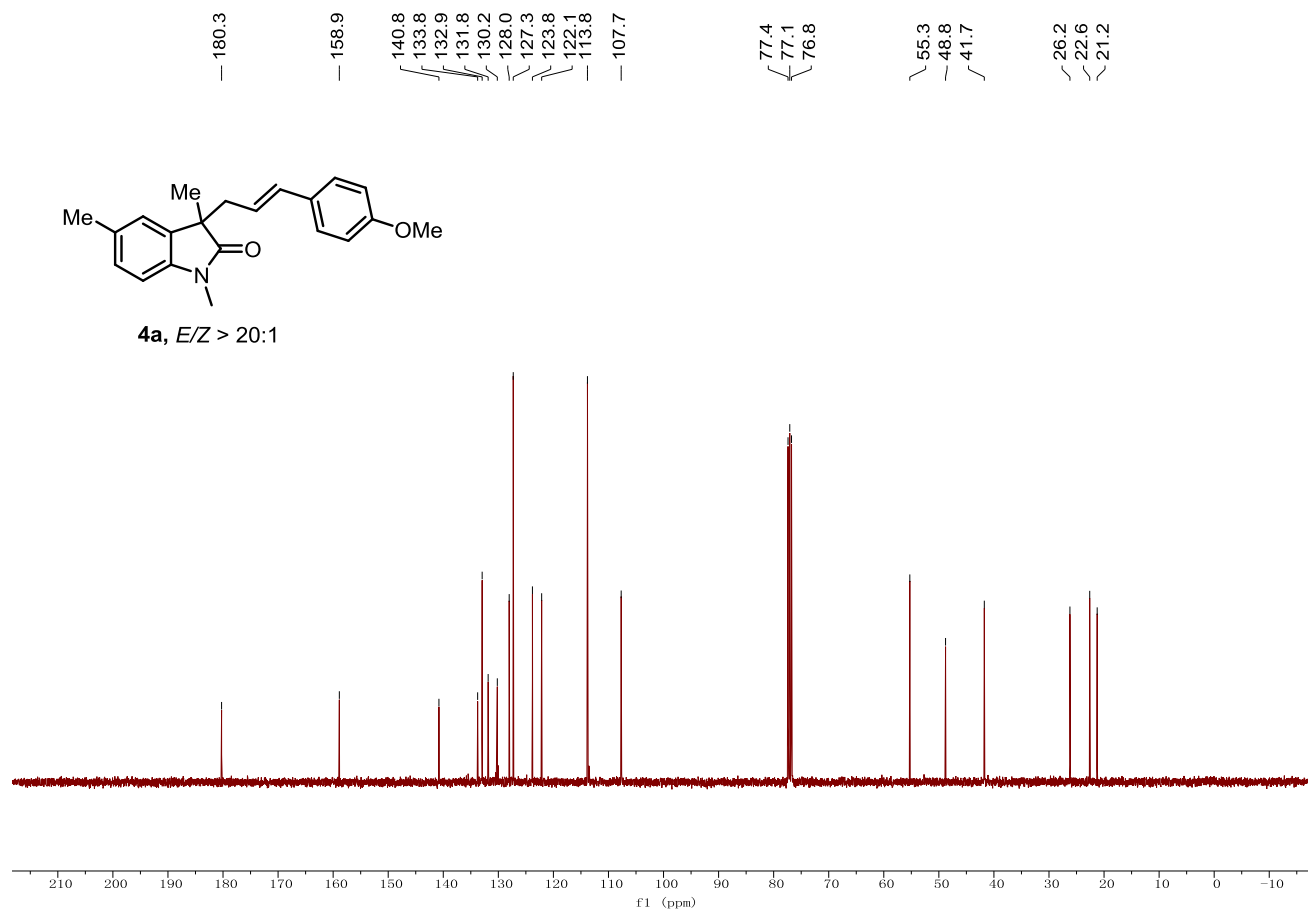

### 4b, <sup>1</sup>H NMR (400 MHz, CDCl<sub>3</sub>)

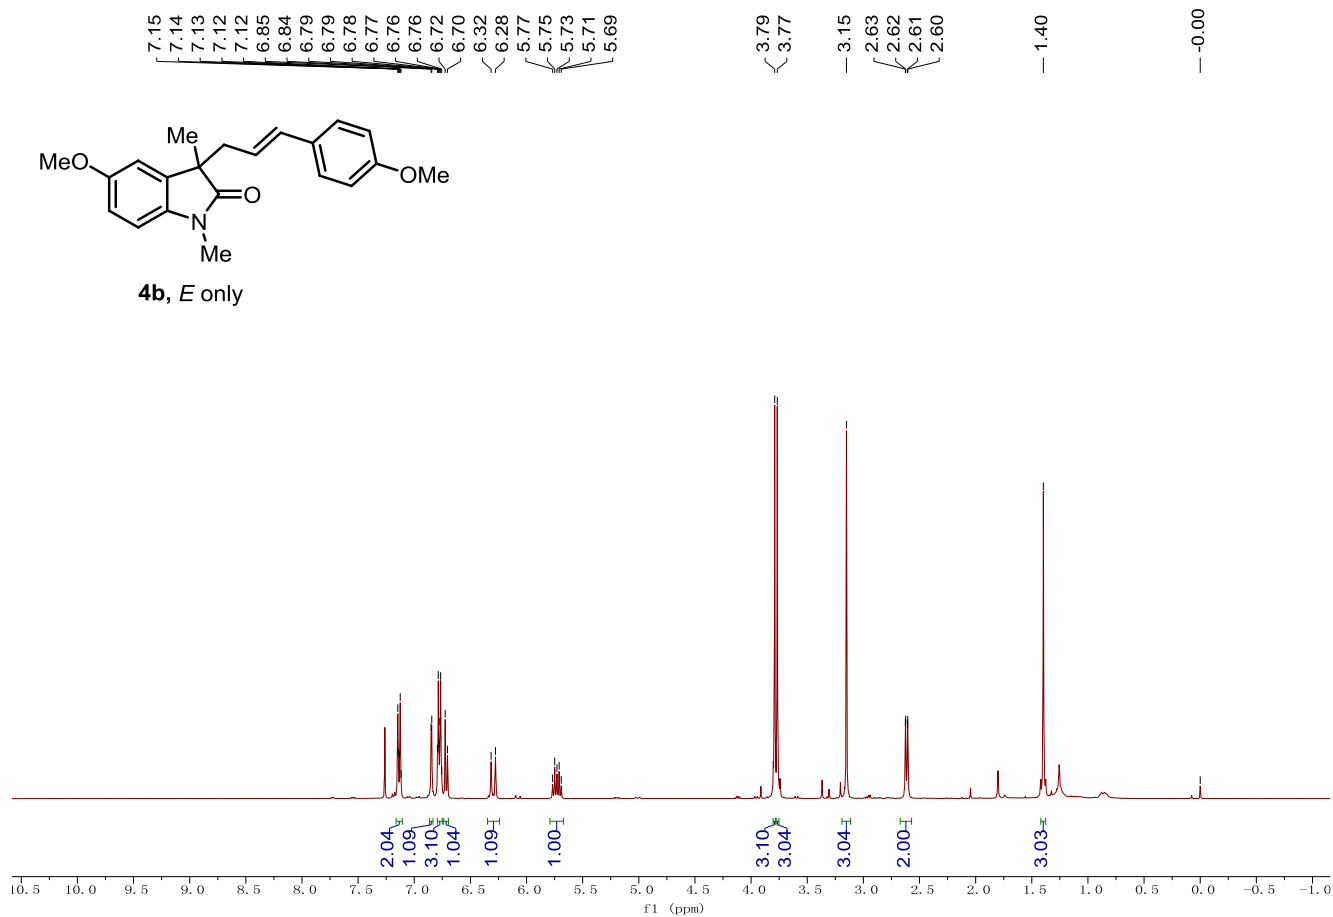

### 4b, <sup>13</sup>C NMR (101 MHz, CDCl<sub>3</sub>)

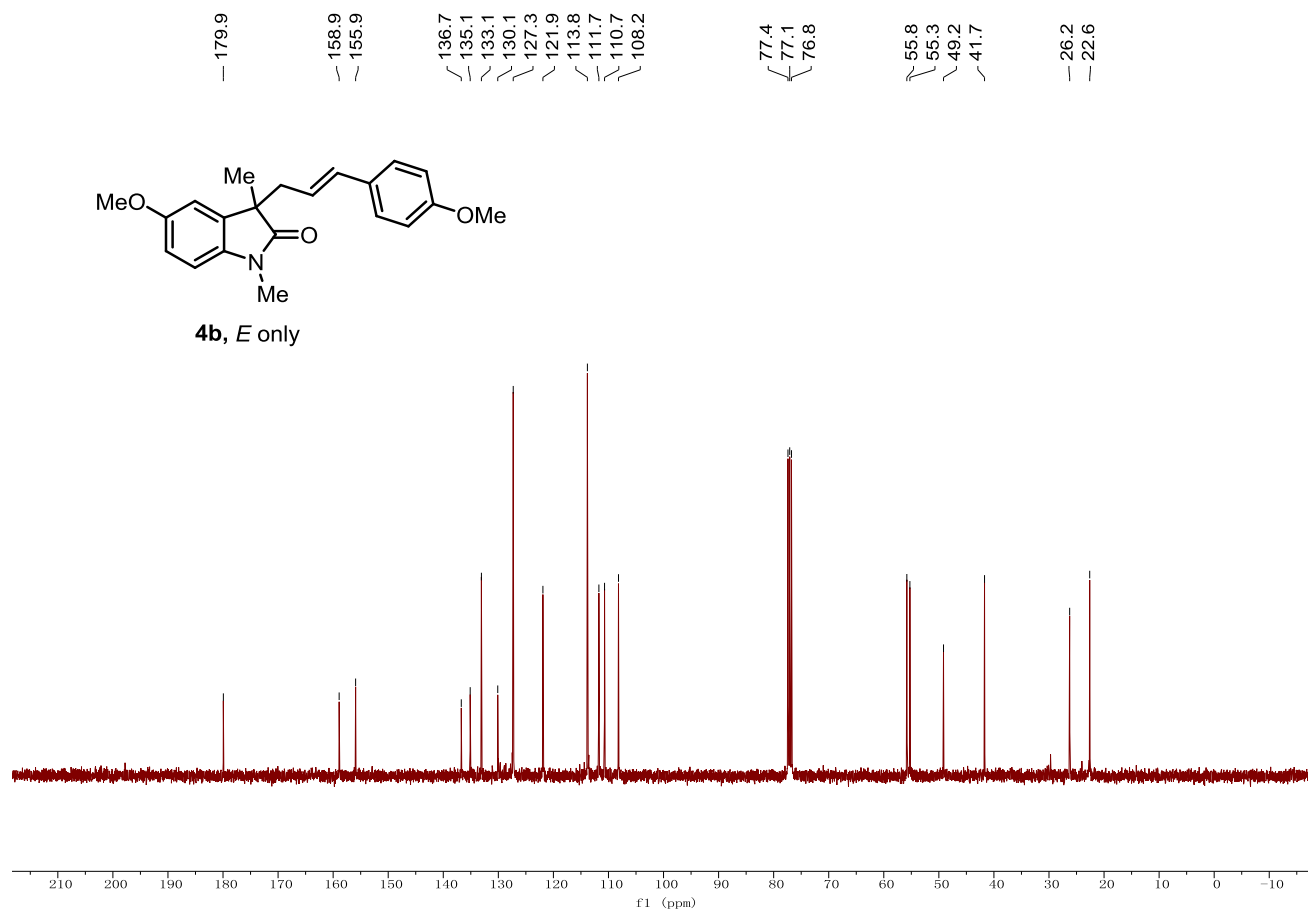

**4c, <sup>1</sup>H NMR (400 MHz, CDCl<sub>3</sub>)**

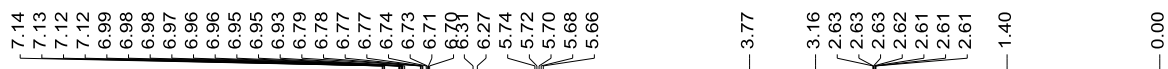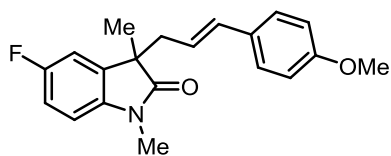

**4c, E only**

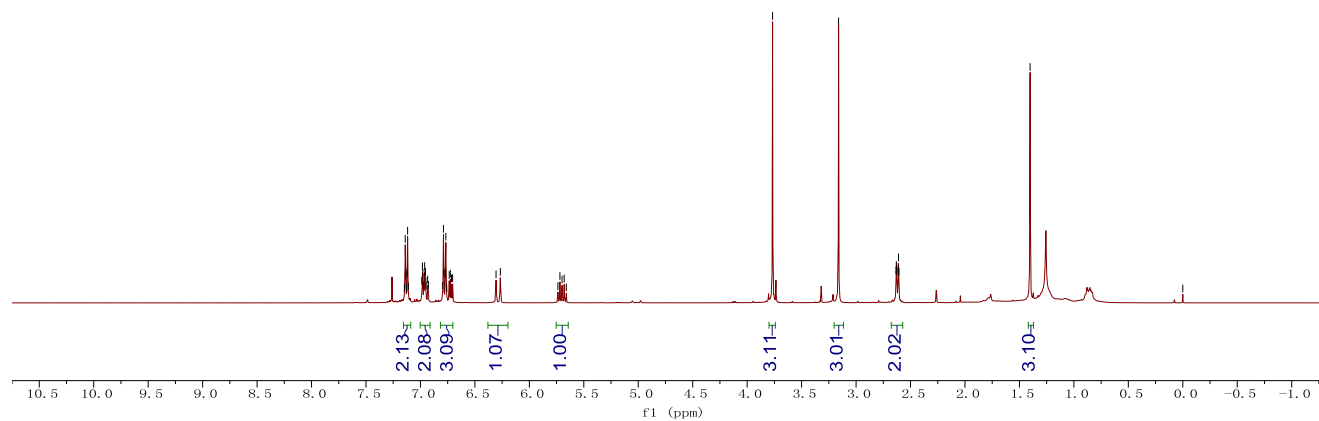

**4c, <sup>13</sup>C NMR (101 MHz, CDCl<sub>3</sub>)**

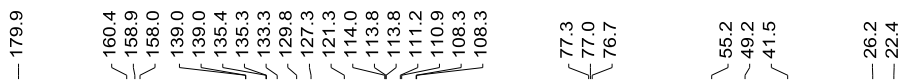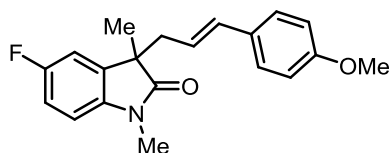

**4c, E only**

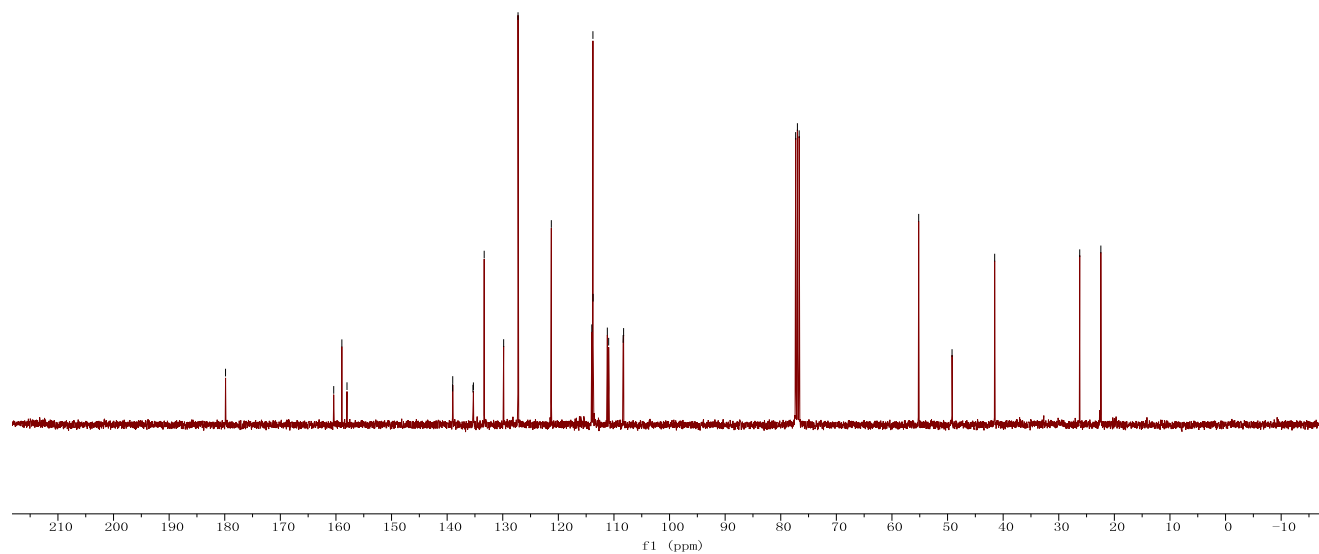

**4c,  $^{19}\text{F}$  NMR (101 MHz,  $\text{CDCl}_3$ )**

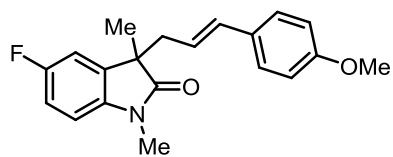

**4c, E only**

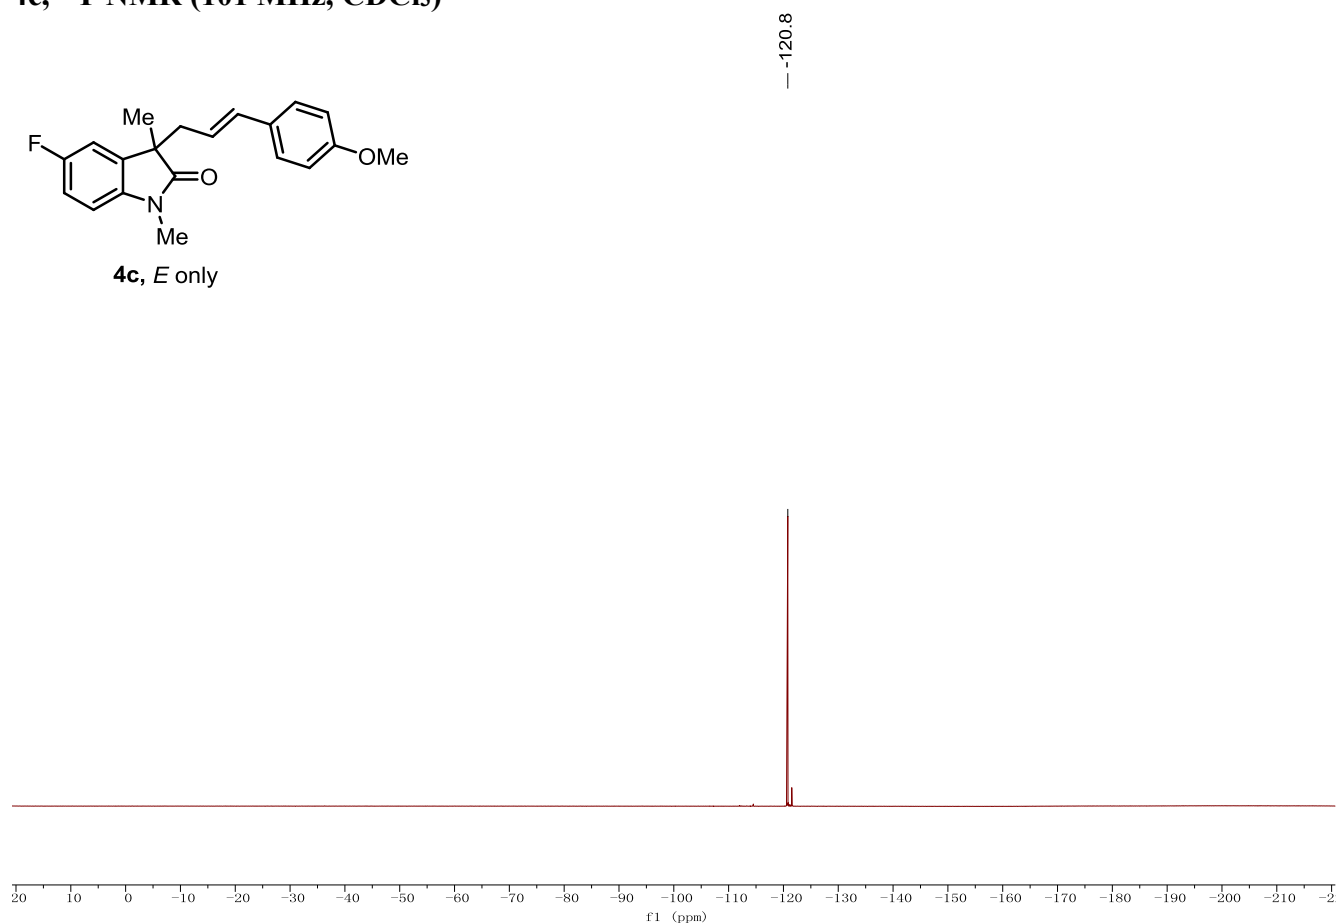

**4d,  $^1\text{H}$  NMR (400 MHz,  $\text{CDCl}_3$ )**

7.56, 7.56, 7.56, 7.54, 7.54, 7.46, 7.45, 7.13, 7.12, 7.11, 7.11, 6.88, 6.86, 6.80, 6.79, 6.78, 6.77, 6.77, 8.38, 6.26, 5.71, 5.69, 5.67, 5.65, 5.63, 3.77, 3.20, 2.66, 2.64, 2.64, 1.44, -0.00

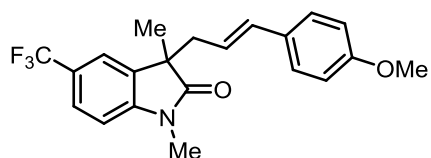

**4d, E only**

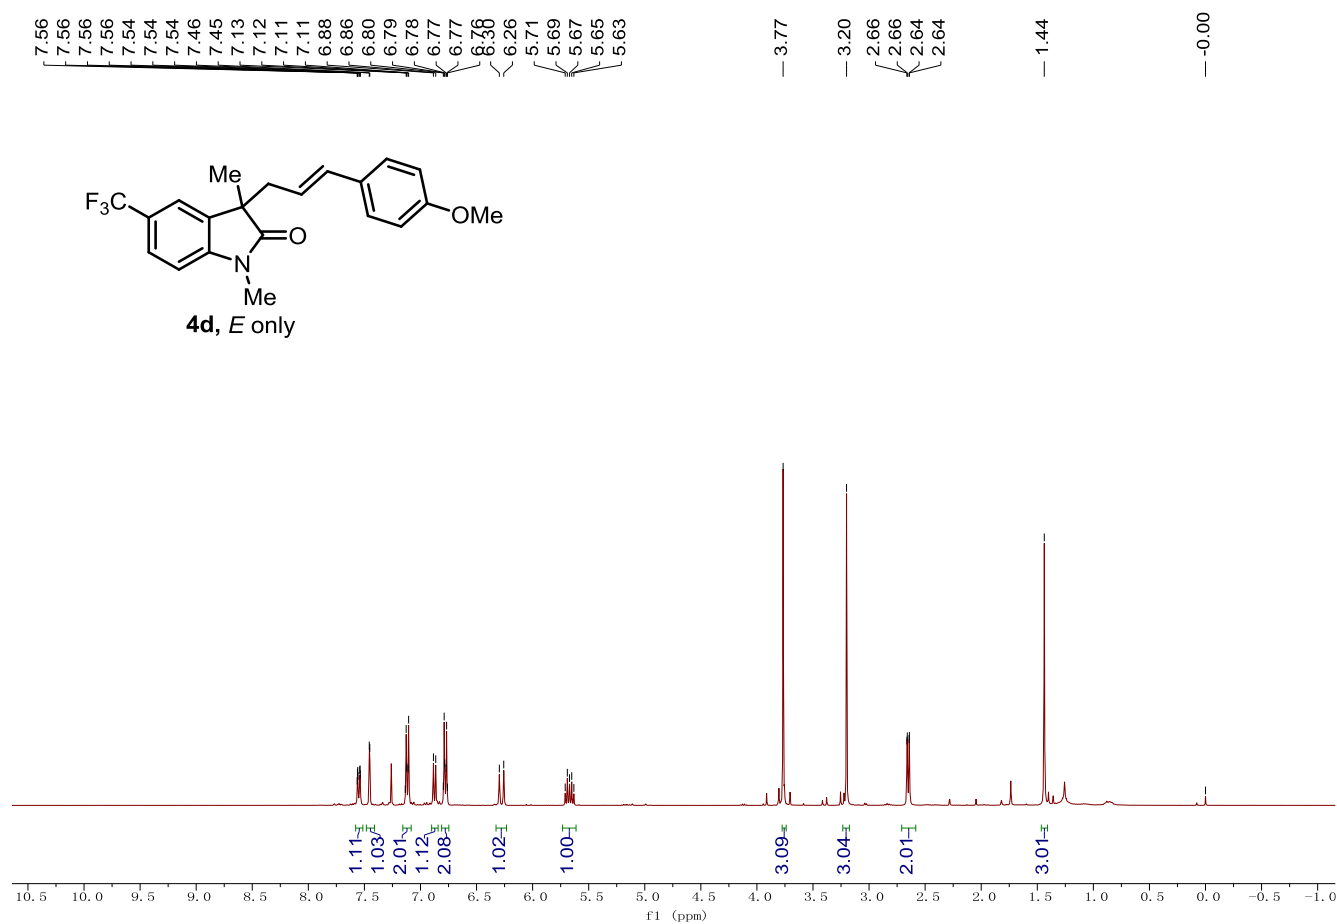

### 4d, <sup>13</sup>C NMR (101 MHz, CDCl<sub>3</sub>)

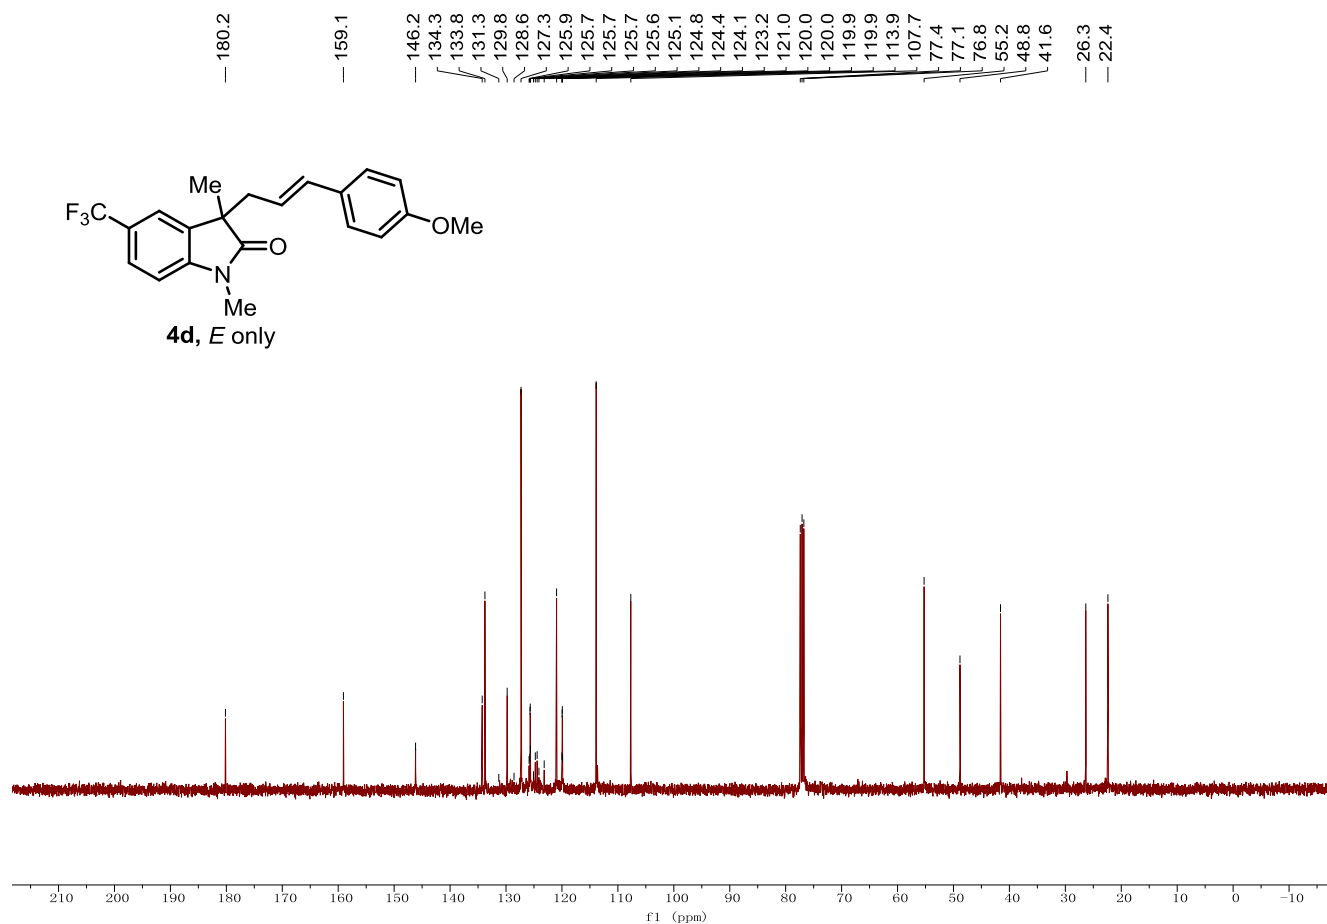

### 4d, <sup>19</sup>F NMR (101 MHz, CDCl<sub>3</sub>)

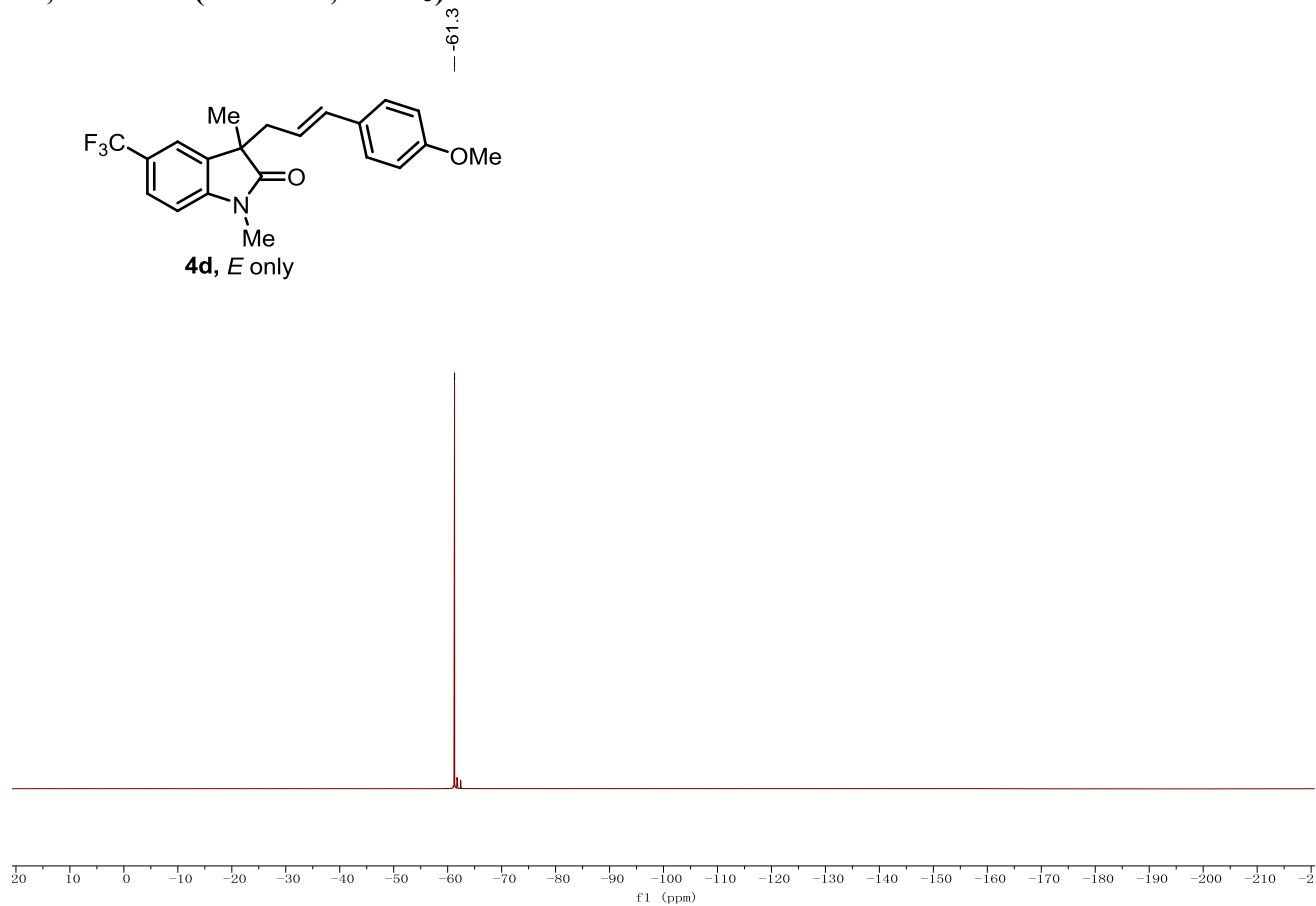

### 4e, <sup>1</sup>H NMR (400 MHz, CDCl<sub>3</sub>)

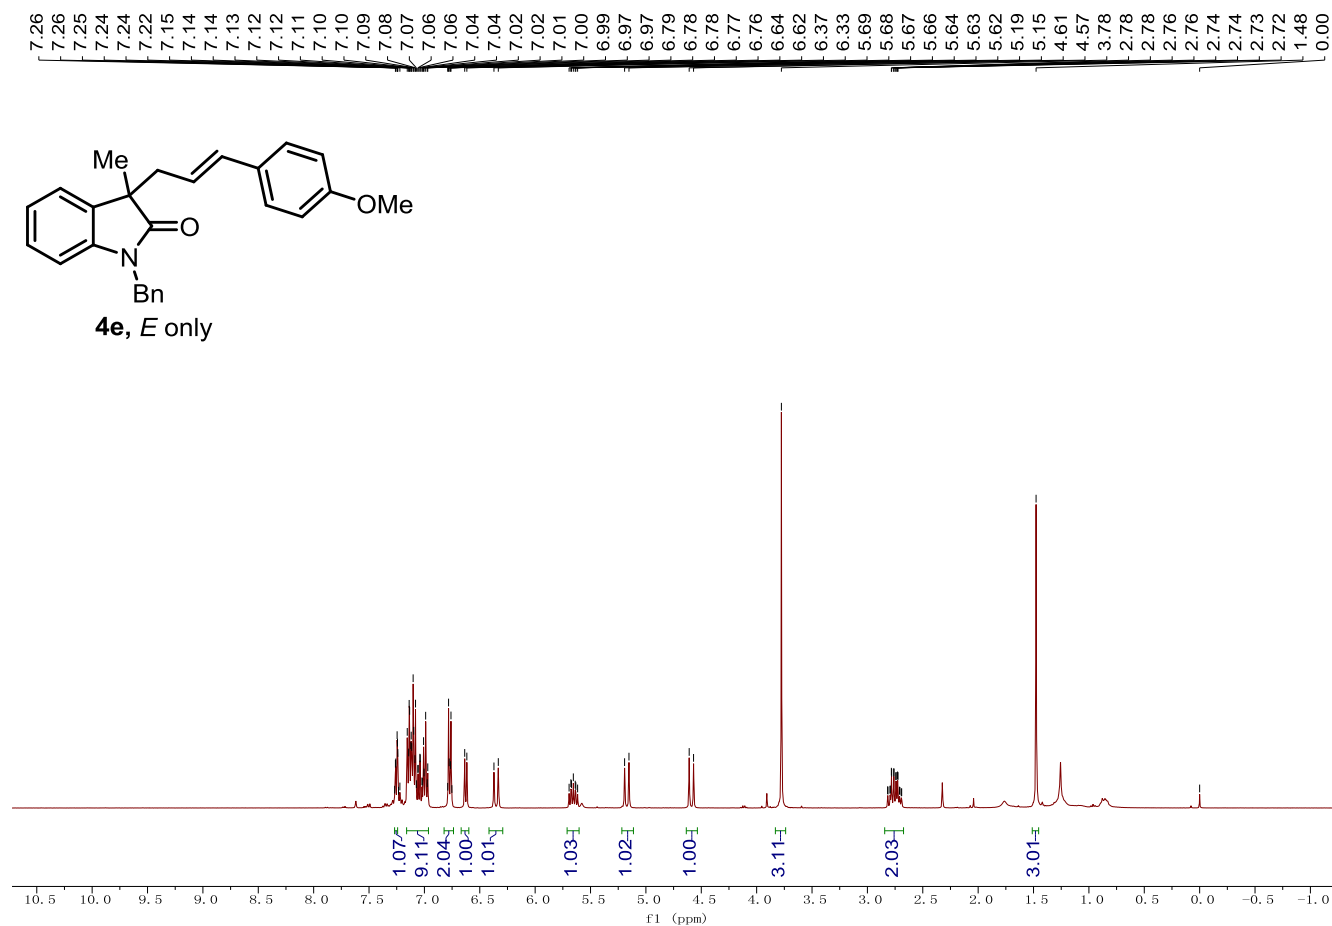

### 4e, <sup>13</sup>C NMR (101 MHz, CDCl<sub>3</sub>)

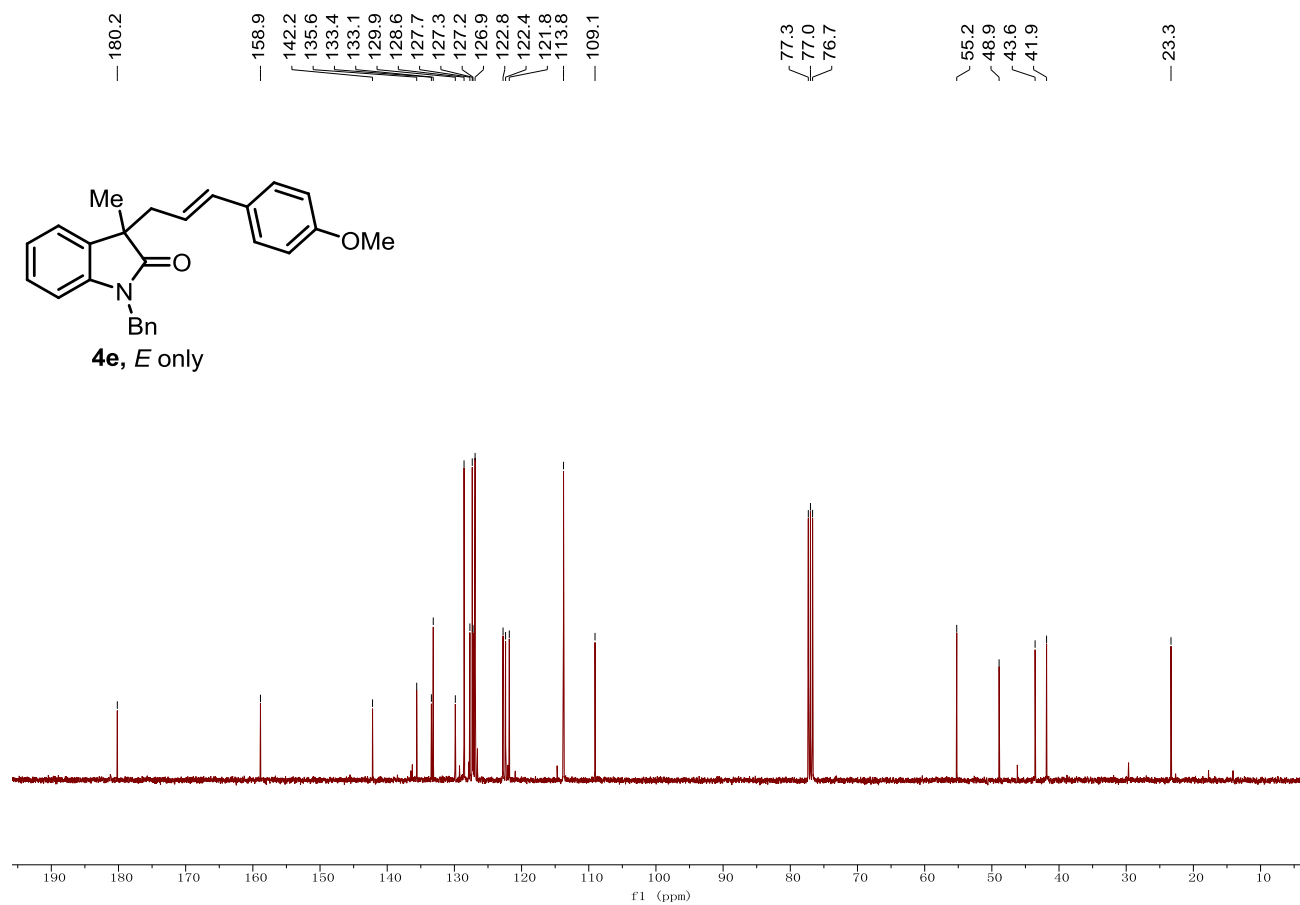



**4f, <sup>1</sup>H NMR (400 MHz, CDCl<sub>3</sub>)**

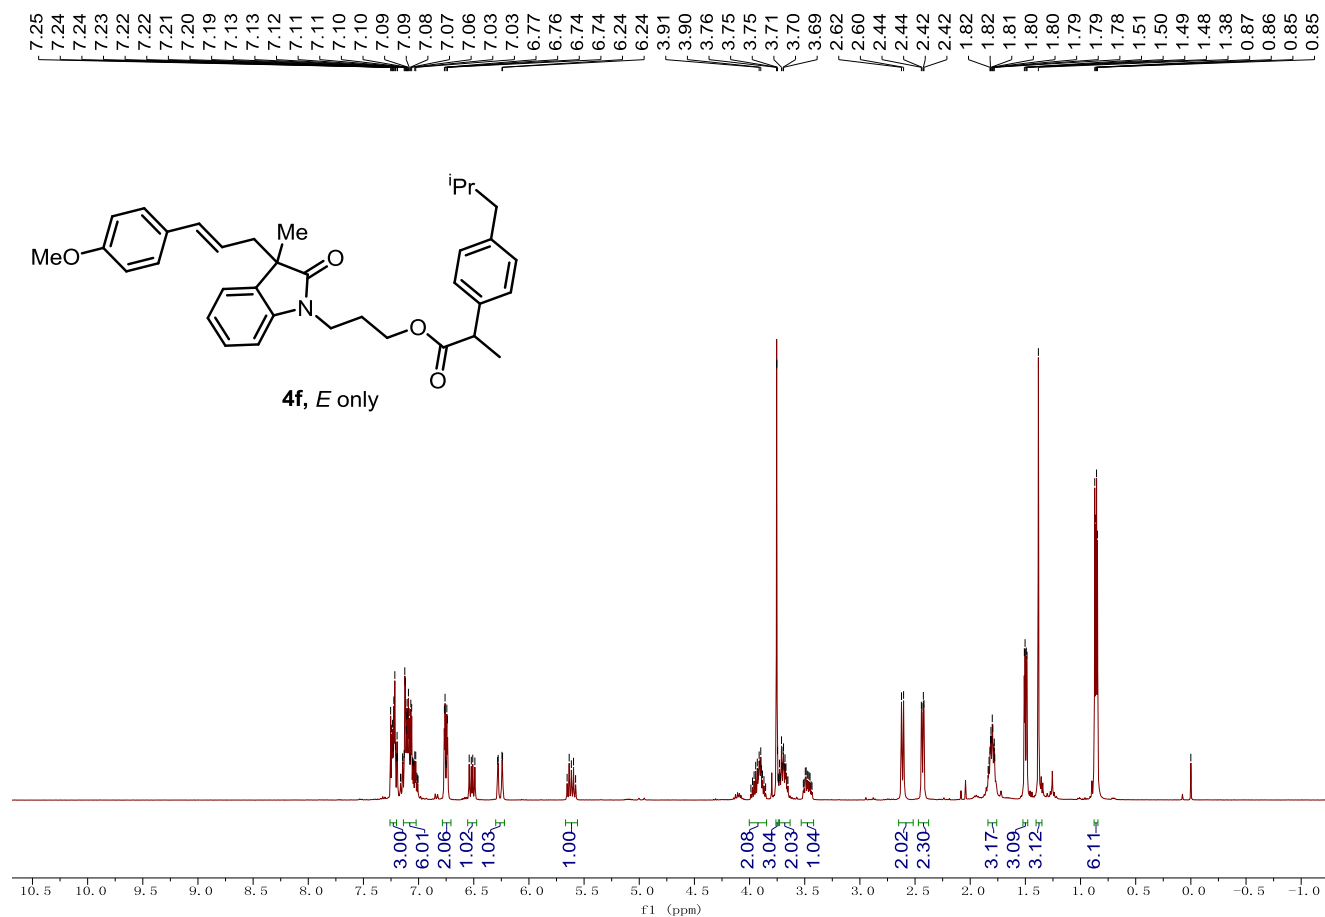

**4f, <sup>13</sup>C NMR (101 MHz, CDCl<sub>3</sub>)**

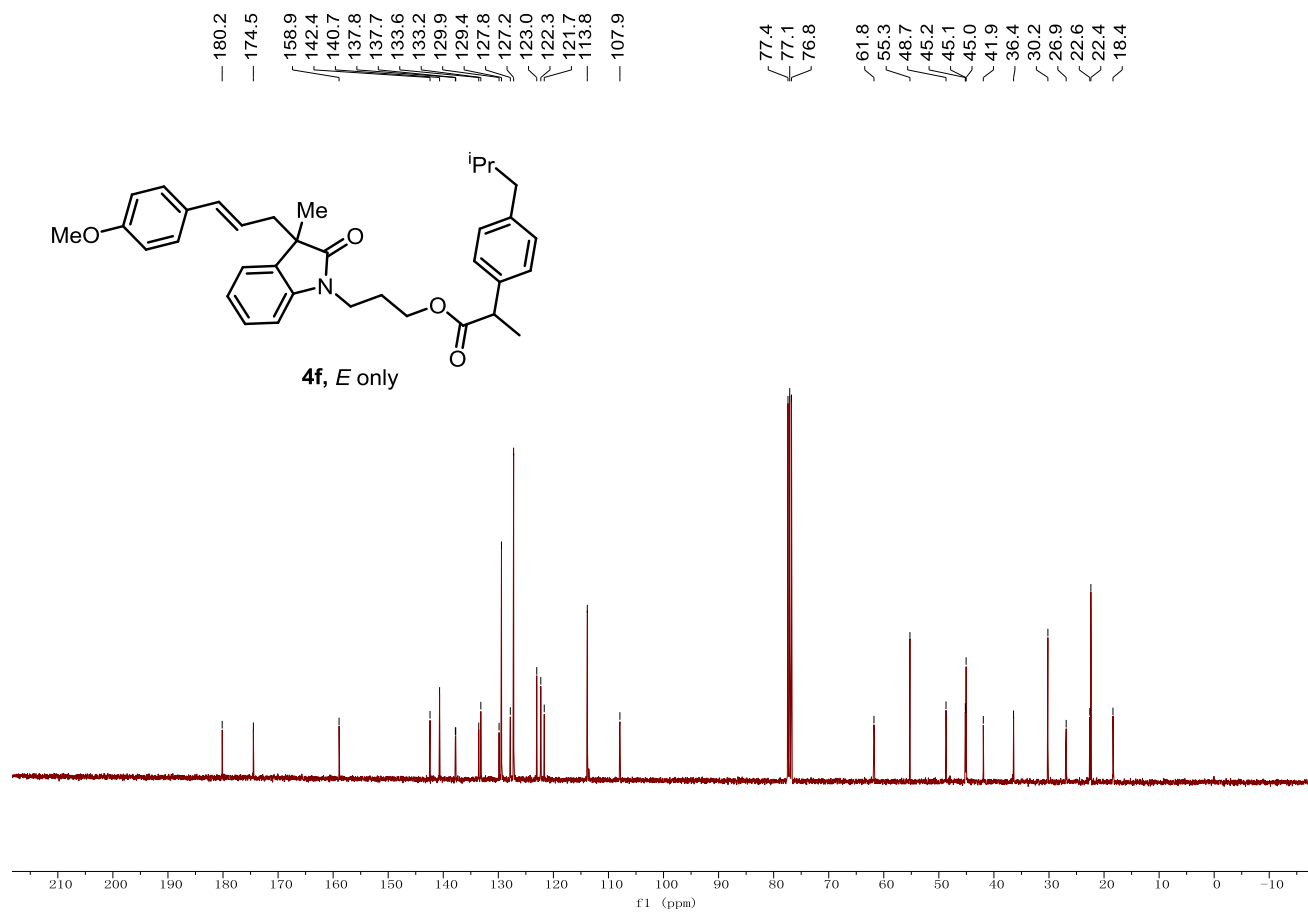

**4g, <sup>1</sup>H NMR (400 MHz, CDCl<sub>3</sub>)**

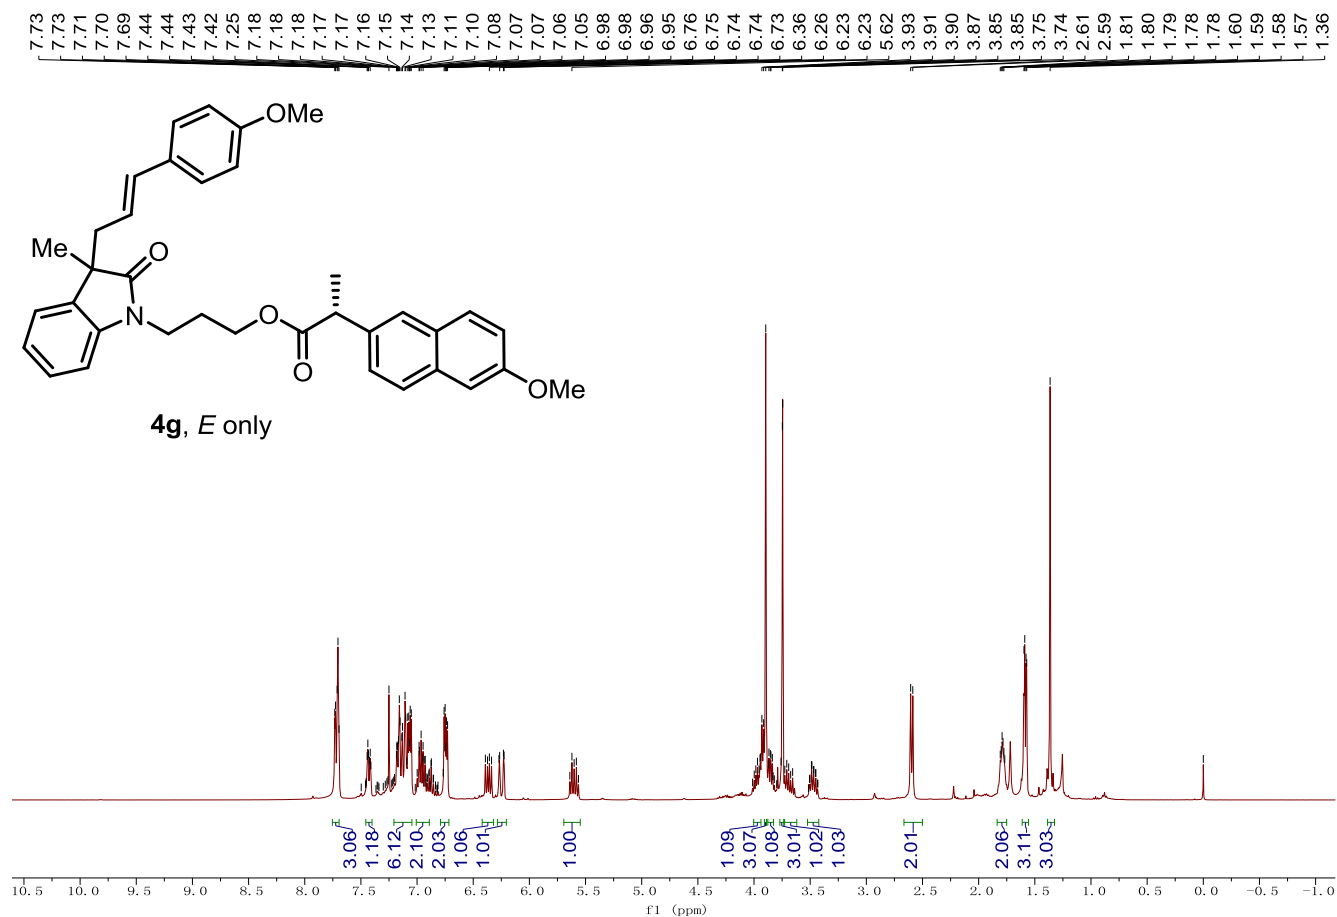

**4g, <sup>13</sup>C NMR (101 MHz, CDCl<sub>3</sub>)**

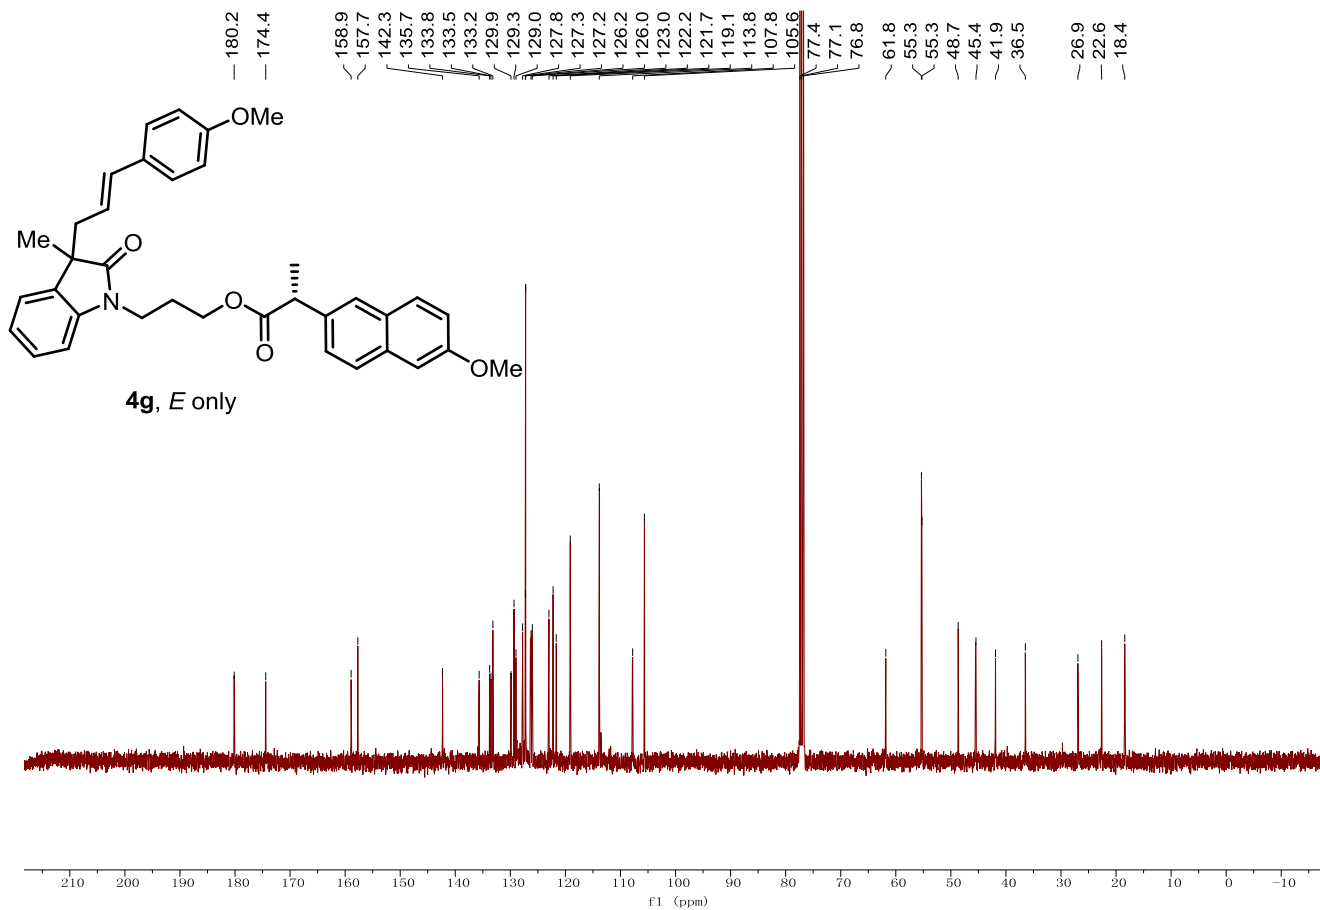

**4h, <sup>1</sup>H NMR (400 MHz, CDCl<sub>3</sub>)**

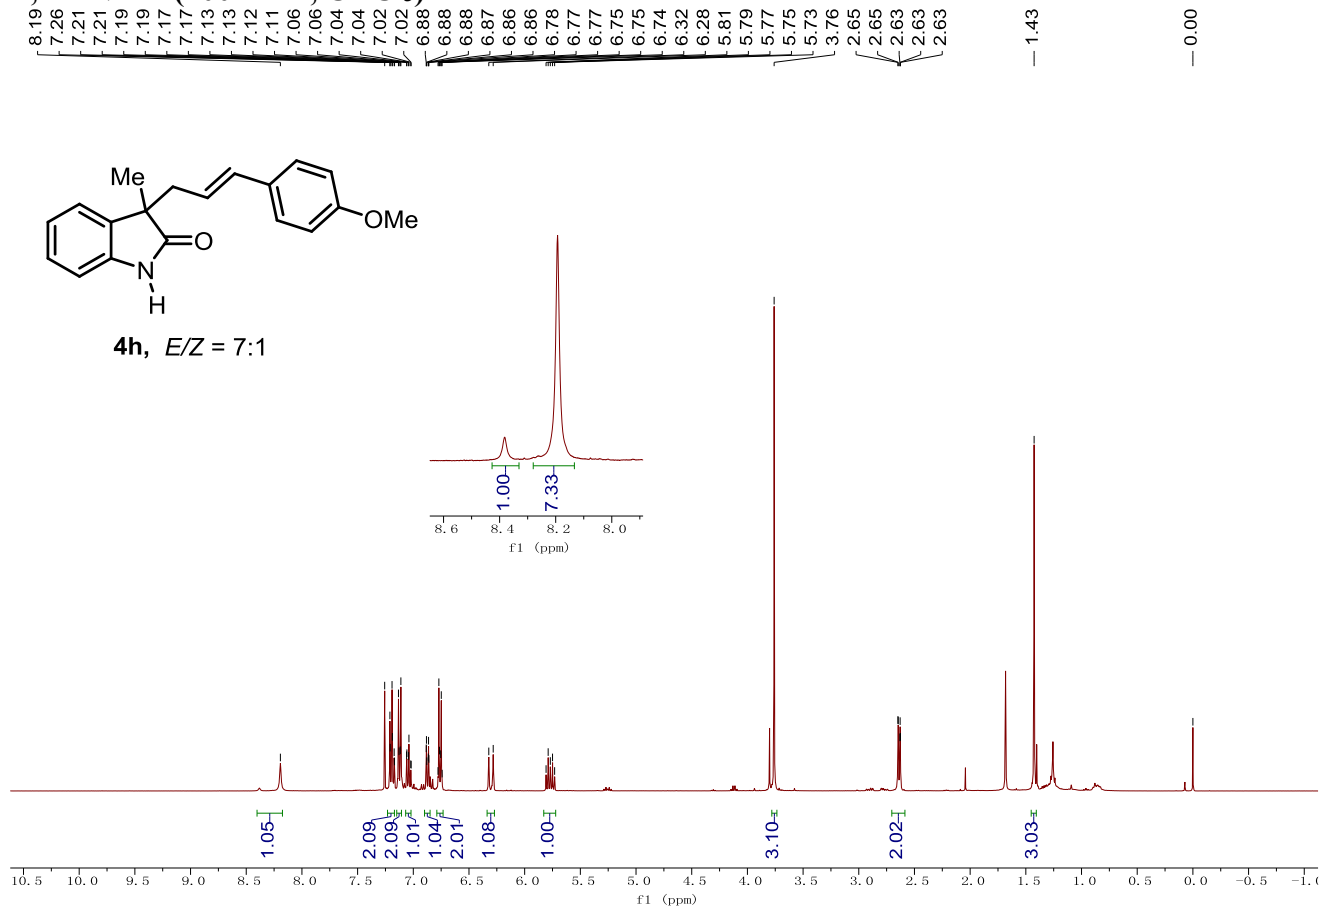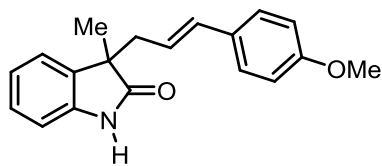

**4h, E/Z = 7:1**

**4h, <sup>13</sup>C NMR (101 MHz, CDCl<sub>3</sub>)**

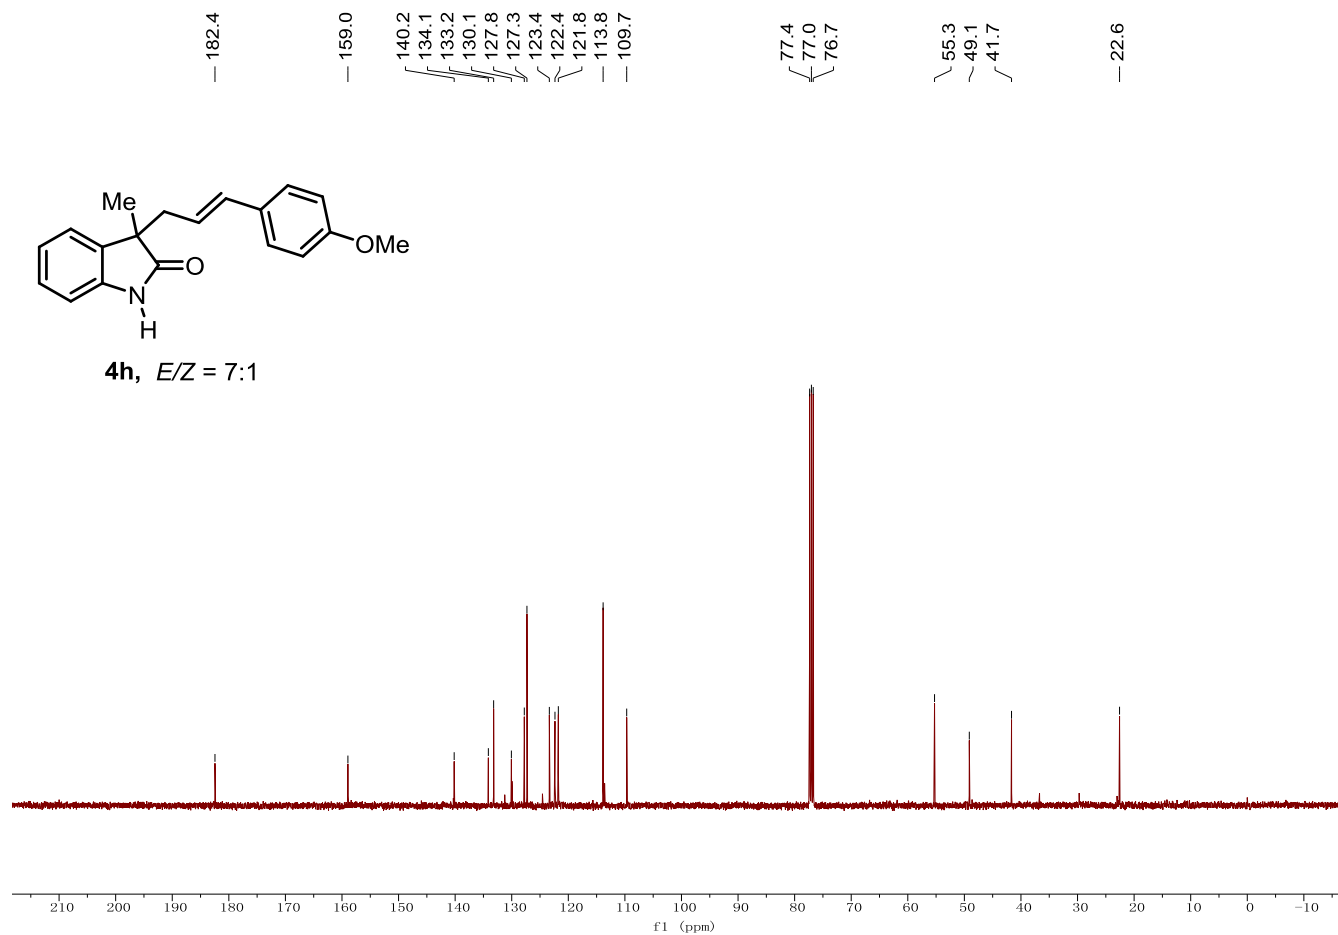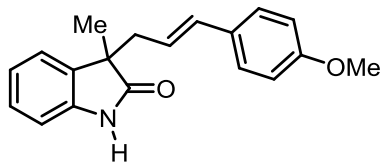

**4h, E/Z = 7:1**

**4i, <sup>1</sup>H NMR (400 MHz, CDCl<sub>3</sub>)**

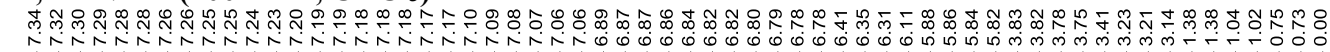

4i, *d.r.* = 1.4:1, *E/Z* = 7:1

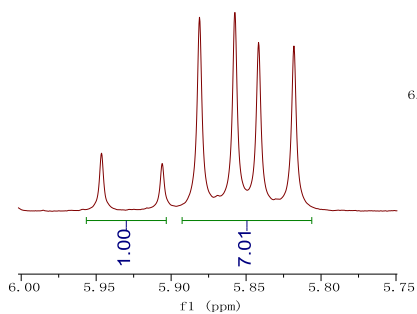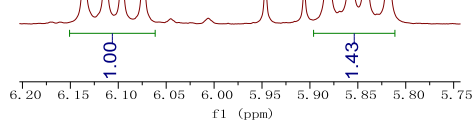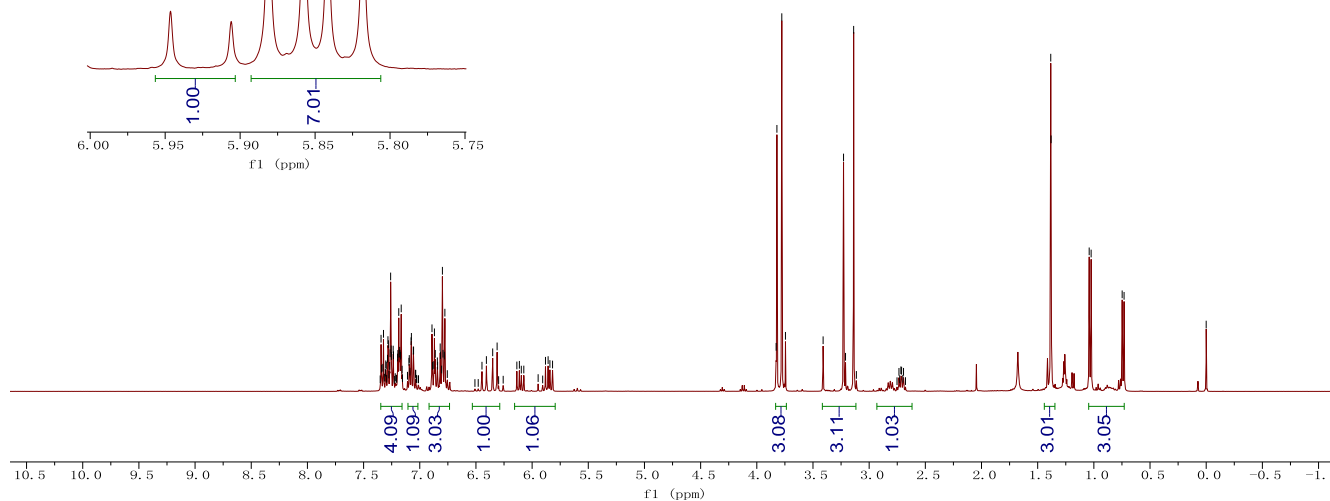

**4i, <sup>13</sup>C NMR (101 MHz, CDCl<sub>3</sub>)**

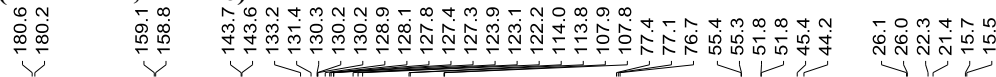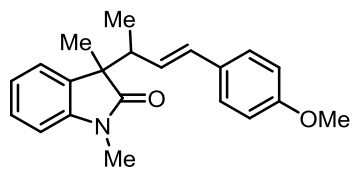

4i, *d.r.* = 1.4:1, *E/Z* = 7:1

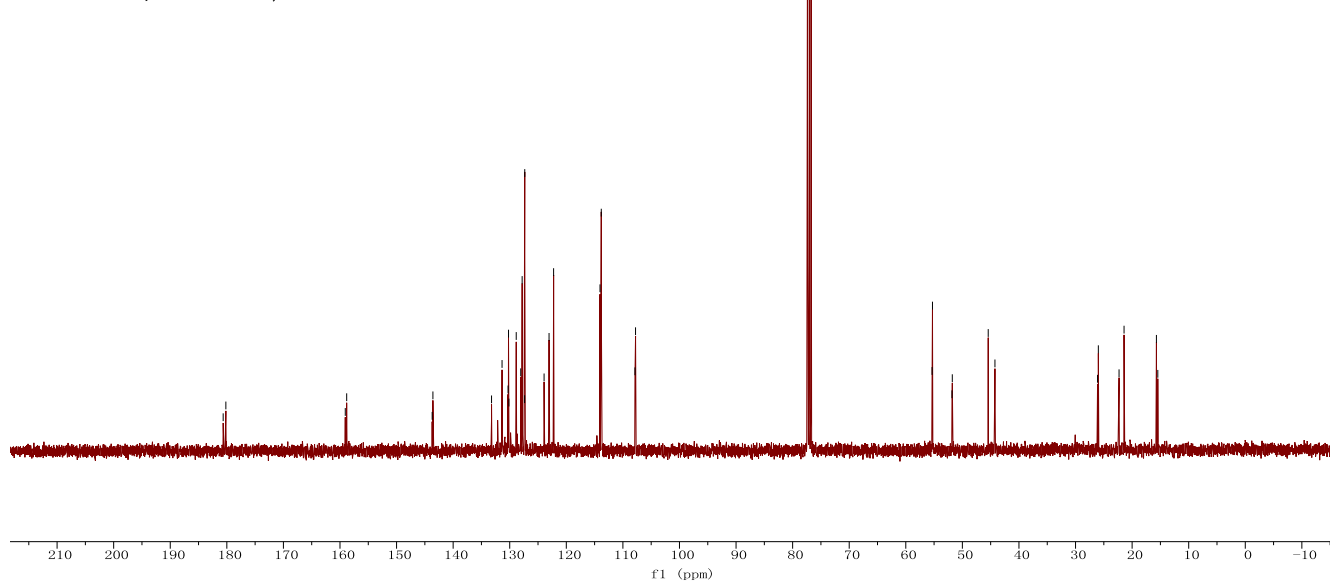

4i', <sup>1</sup>H NMR (400 MHz, CDCl<sub>3</sub>)

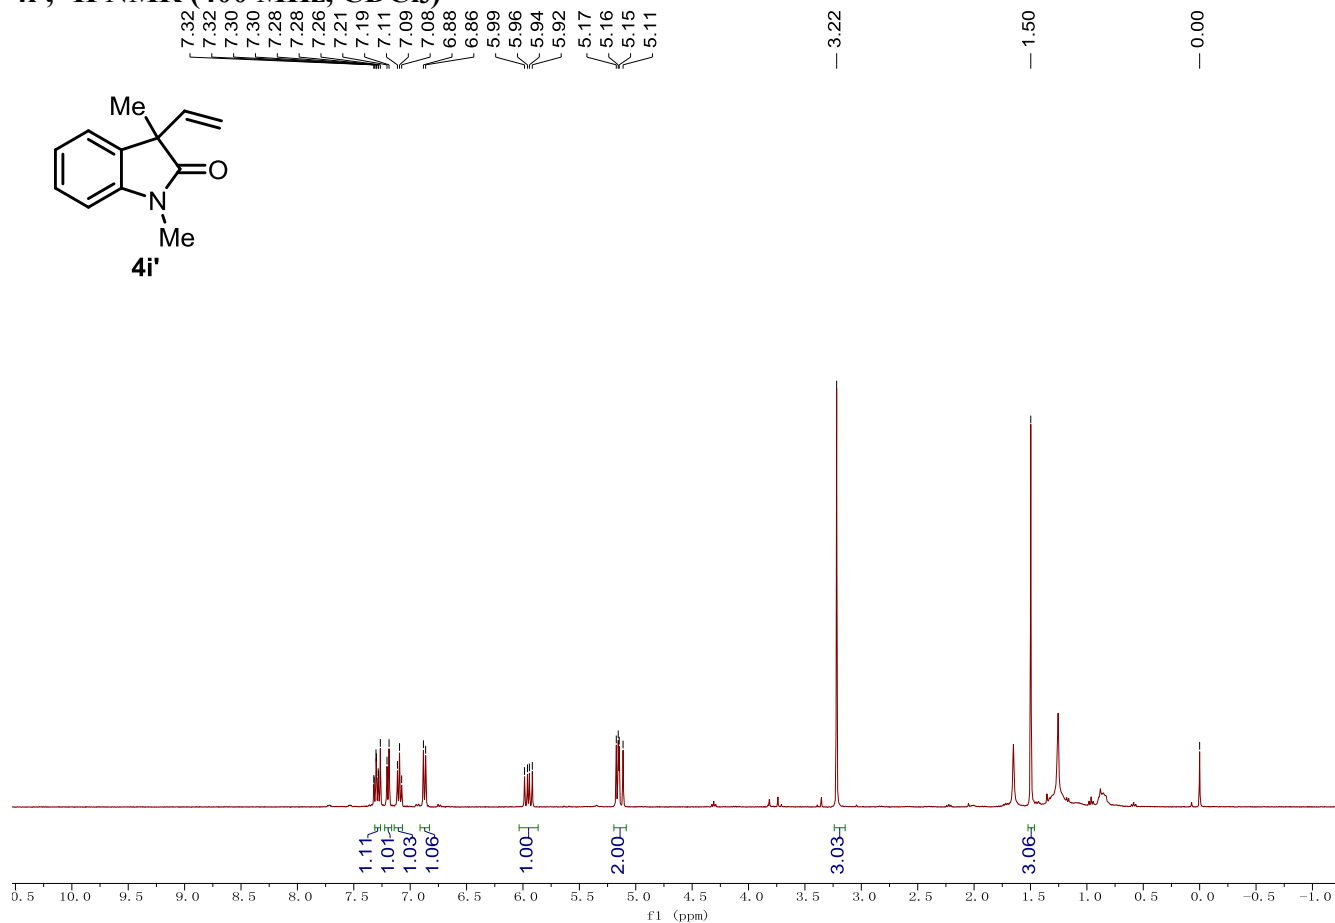

4i', <sup>13</sup>C NMR (101 MHz, CDCl<sub>3</sub>)

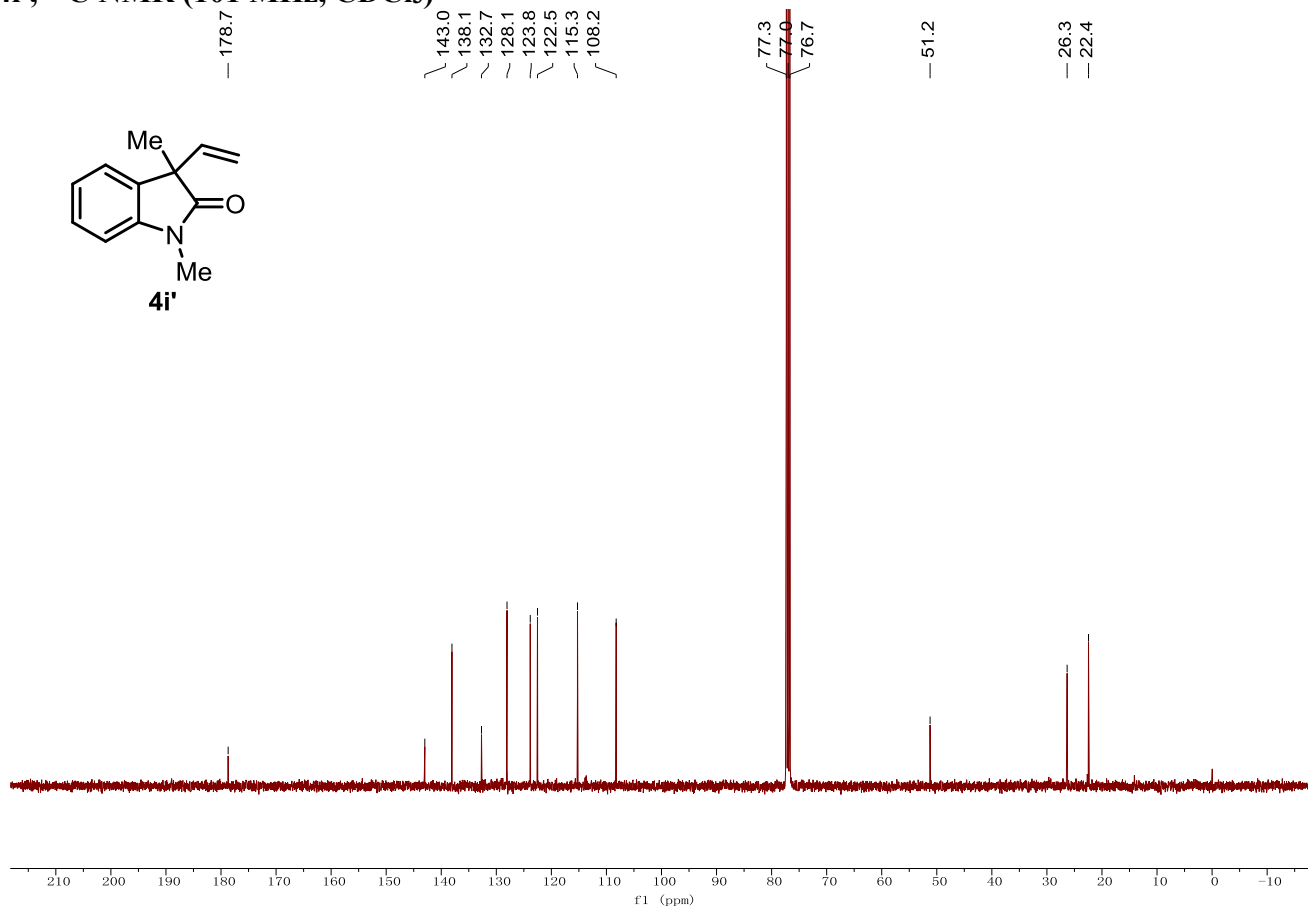

**4j, <sup>1</sup>H NMR (400 MHz, CDCl<sub>3</sub>)**

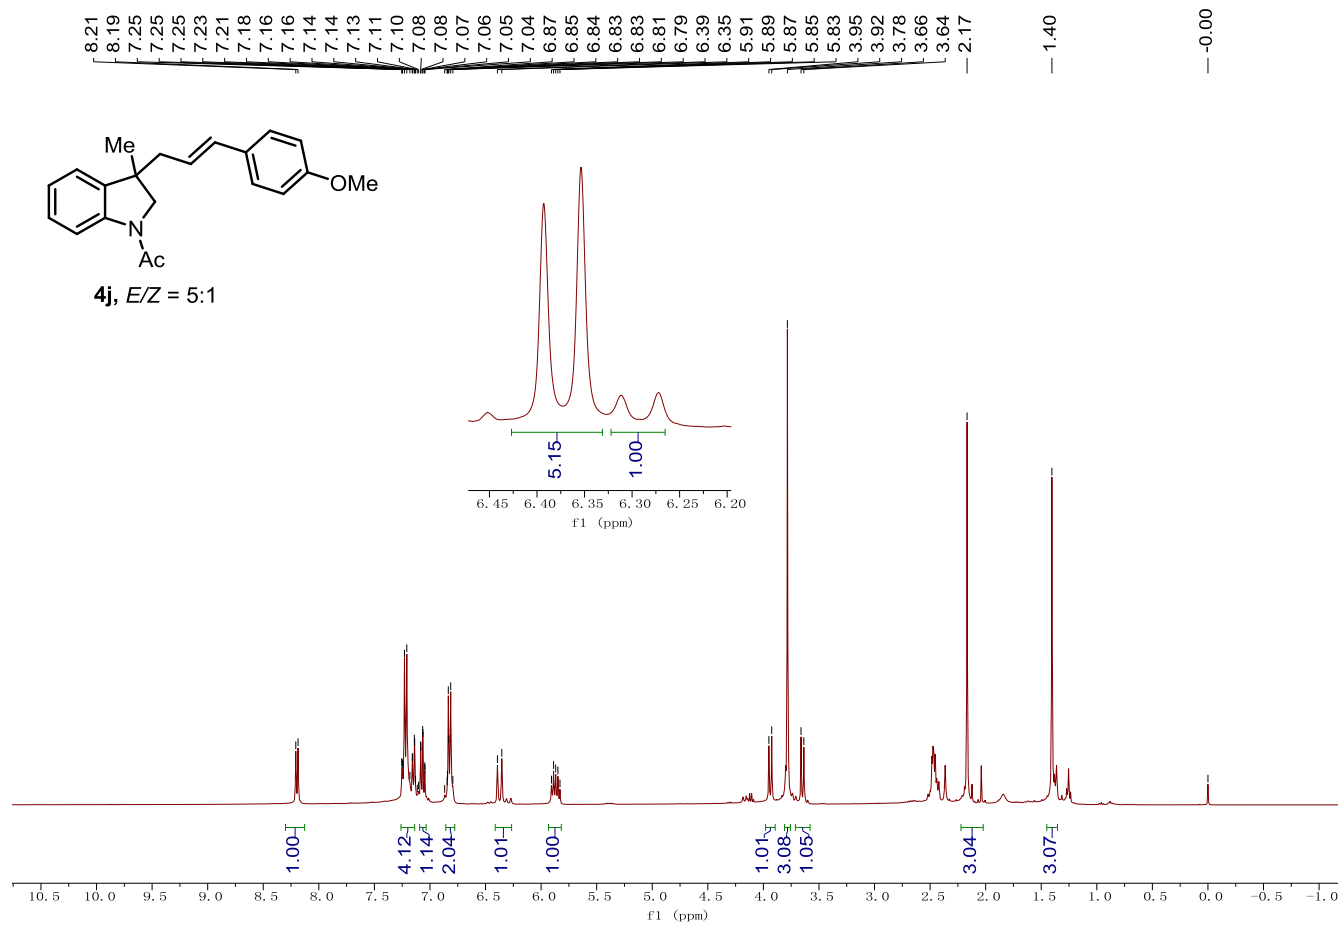

**4j, <sup>13</sup>C NMR (101 MHz, CDCl<sub>3</sub>)**

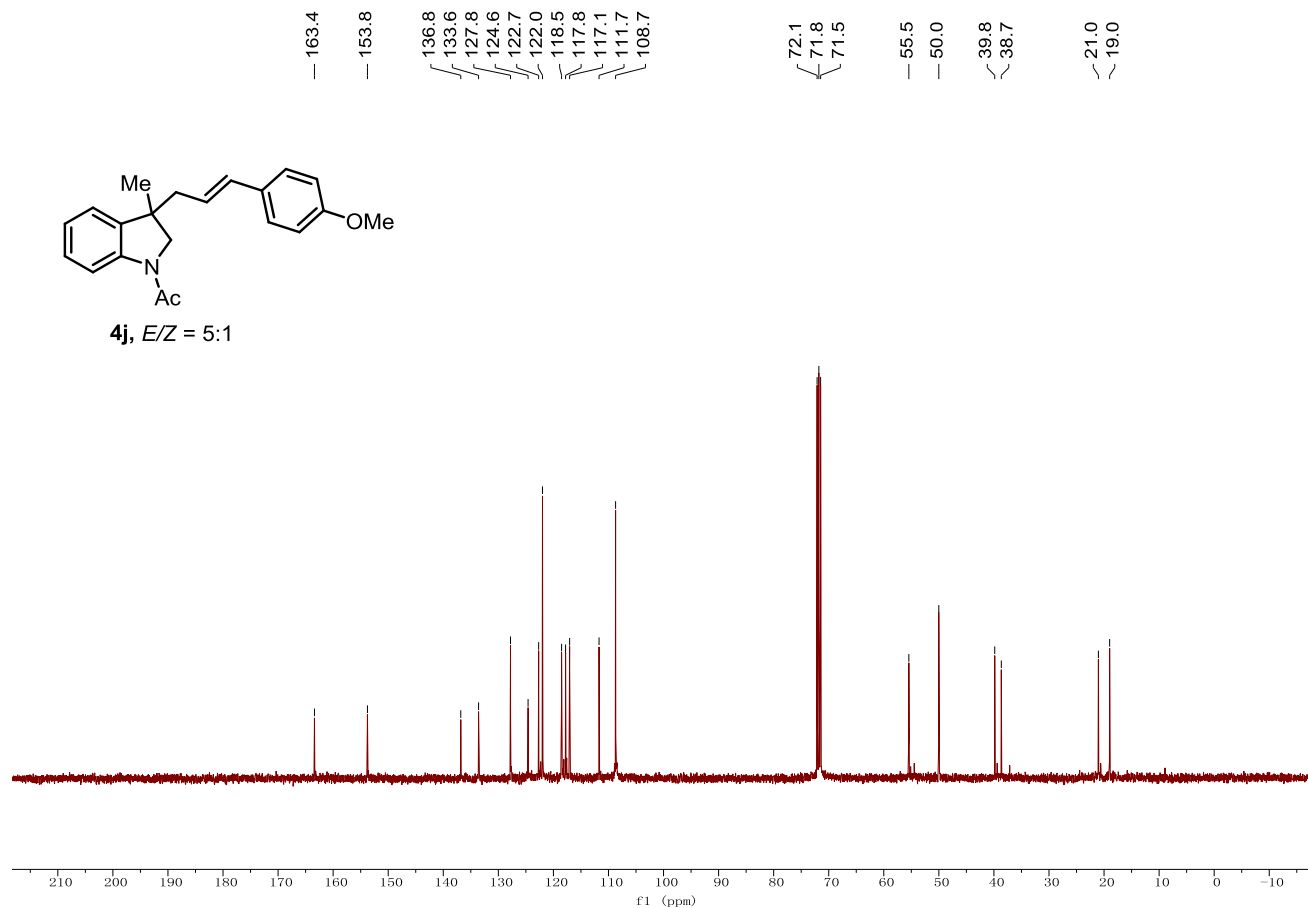

### 4k, <sup>1</sup>H NMR (400 MHz, CDCl<sub>3</sub>)

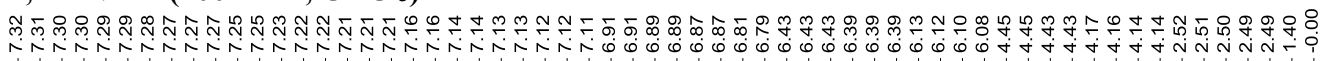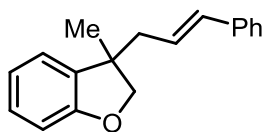

4k, *E* only

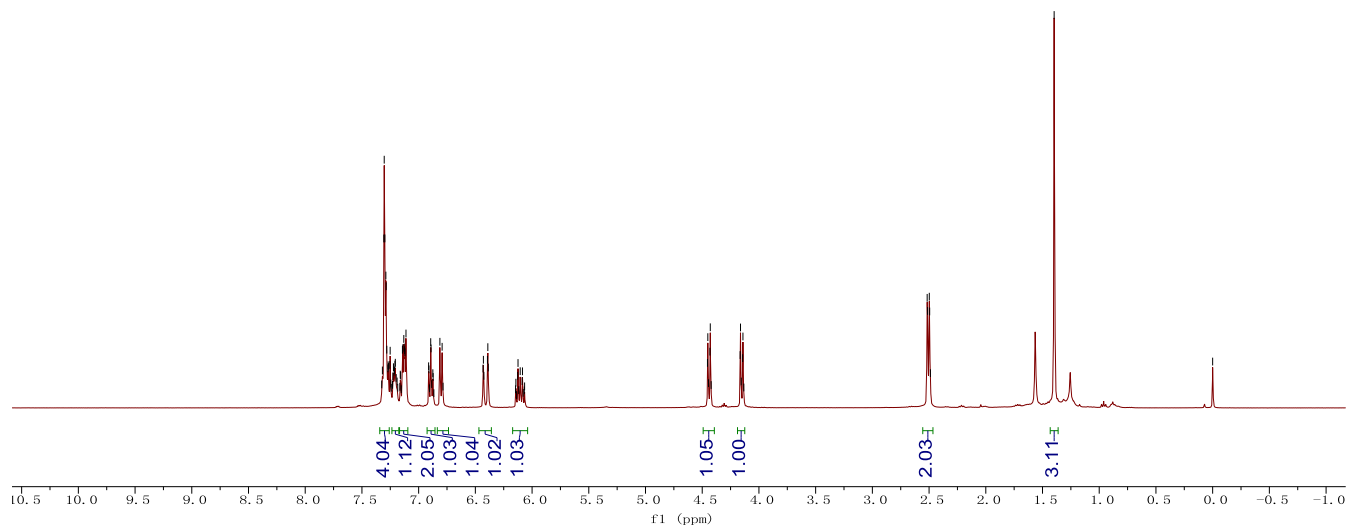

### 4k, <sup>13</sup>C NMR (101 MHz, CDCl<sub>3</sub>)

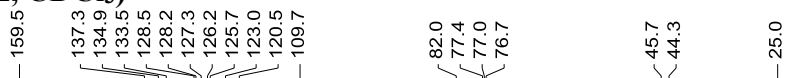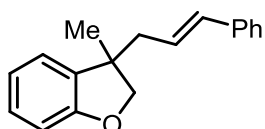

4k, *E* only

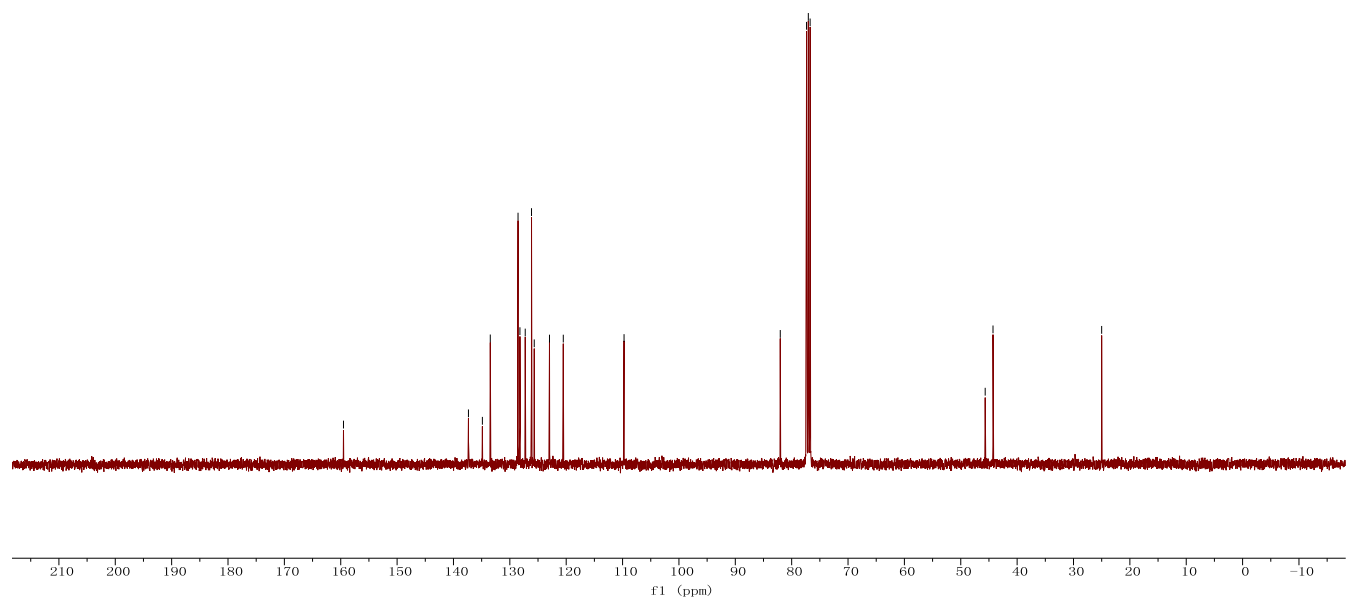

**9, <sup>1</sup>H NMR (400 MHz, CDCl<sub>3</sub>)**

7.25  
7.25  
7.23  
7.23  
7.22  
7.21  
7.20  
7.20  
7.18  
7.17  
7.17  
7.16  
6.85  
6.84  
6.79  
6.78  
6.77  
6.76  
6.72  
6.70  
6.37  
6.33  
5.91  
5.89  
5.87  
5.85  
5.83

— 3.78  
— 3.15  
— 2.65  
— 2.64  
— 2.63  
— 2.63

— 1.40

— -0.00

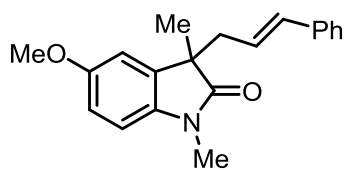

**9, E only**

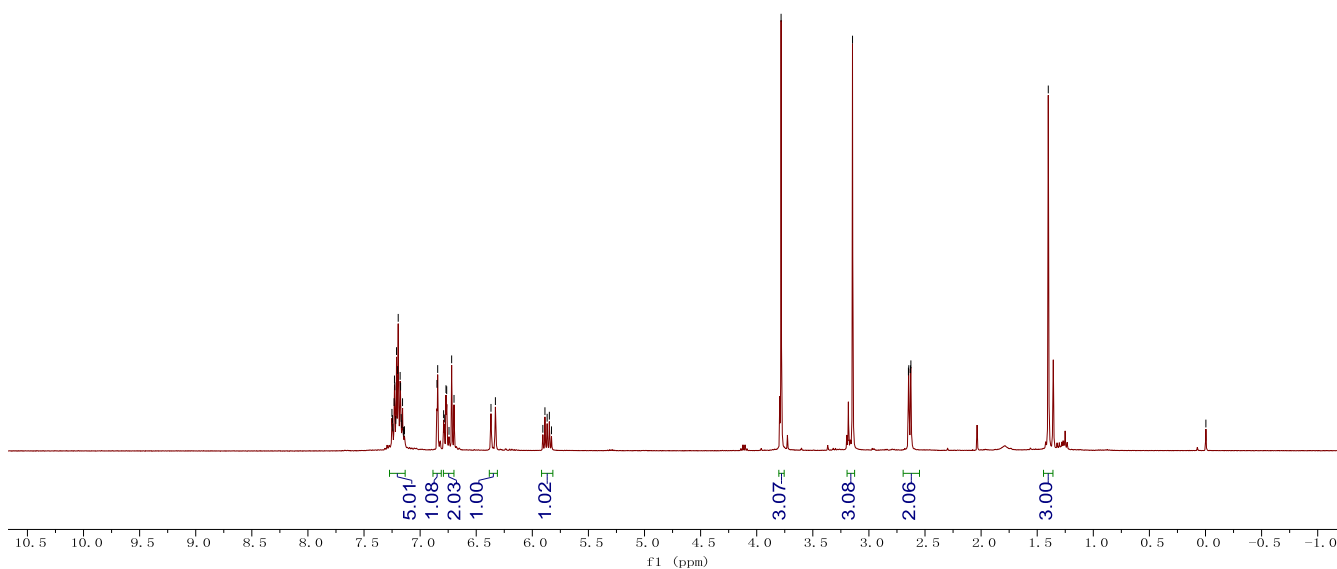

**9, <sup>13</sup>C NMR (101 MHz, CDCl<sub>3</sub>)**

— 179.8

— 155.9  
— 137.2  
— 136.7  
— 134.9  
— 133.6  
— 128.3  
— 127.1  
— 126.1  
— 124.1  
— 111.7  
— 110.6  
— 108.1

— 77.3  
— 77.0  
— 76.7

— 55.8  
— 49.0  
— 41.6

— 26.2  
— 22.6

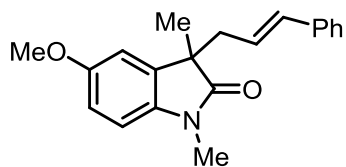

**9, E only**

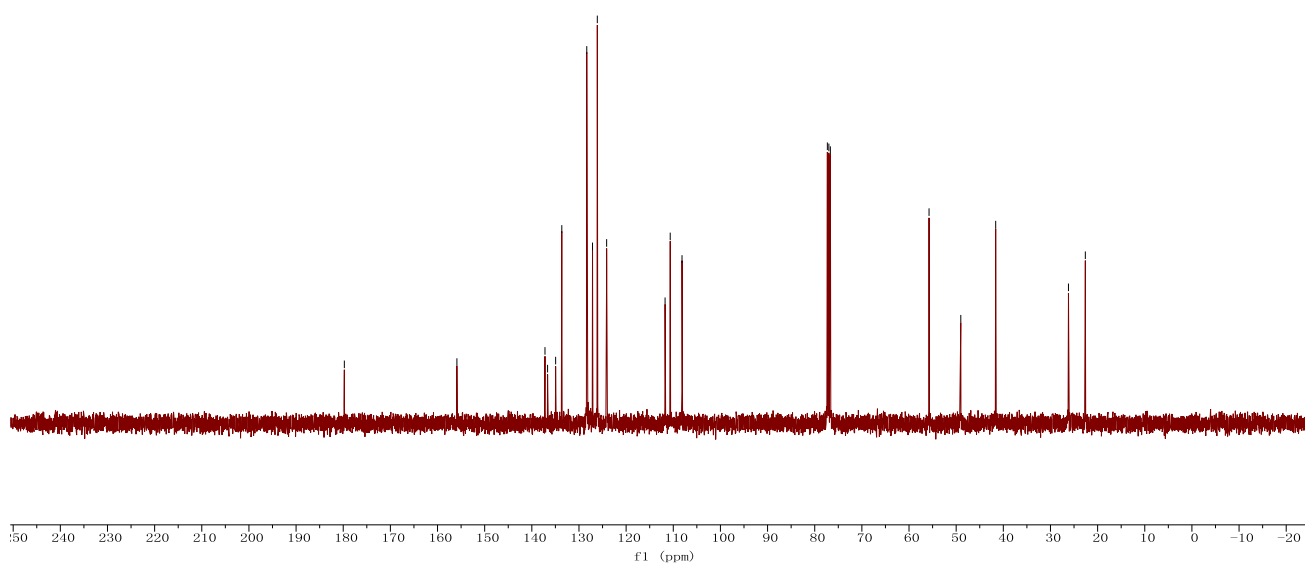



**10, <sup>1</sup>H NMR (400 MHz, CDCl<sub>3</sub>)**

7.36, 7.36, 7.34, 7.34, 7.32, 7.32, 7.31, 7.31, 7.29, 7.29, 7.27, 7.27, 7.27, 7.25, 7.25, 7.22, 7.22, 7.14, 7.14, 7.12, 7.12, 7.10, 7.10, 7.08, 7.08, 7.06, 7.06, 7.04, 7.04, 6.90, 6.90, 6.88, 6.88, 6.83, 6.83, 4.03, 4.01, 3.98, 3.96, 3.54, 3.54, 3.51, 3.51, 3.44, 3.44, 3.25, 3.25, 3.23, 3.23, 2.05, 2.04, 2.04, 1.52, 1.52, 1.40, 1.38, 1.37, 1.36, 1.35, 1.34, 1.34, 1.32, 1.31, 1.29, 1.28, 1.28, 1.26, 1.25, 1.25, 1.24, 1.24, 1.24, 1.22, 1.22, 1.22, 1.08, 1.08, 0.98, 0.98, 0.67, 0.67, 0.00

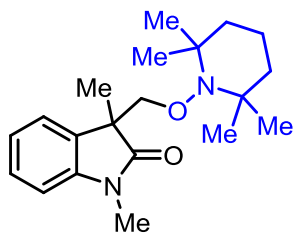

**10, 68%**

+

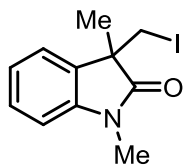

**3a, 10%**

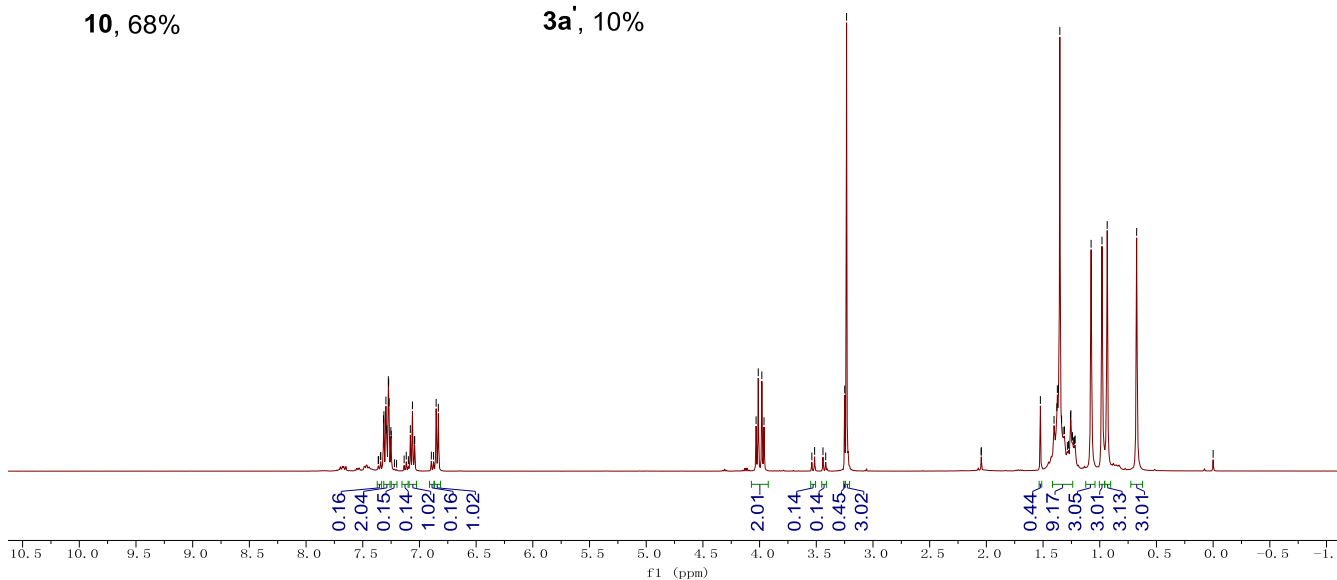

**10, <sup>13</sup>C NMR (101 MHz, CDCl<sub>3</sub>)**

178.8, 177.8, 143.6, 143.0, 132.8, 132.5, 128.5, 127.6, 122.8, 122.6, 122.5, 121.9, 108.2, 107.5, 79.6, 77.3, 77.0, 76.7, 60.0, 59.9, 48.8, 48.5, 39.4, 39.4, 32.6, 32.6, 26.2, 26.0, 22.8, 19.8, 19.5, 18.8, 16.8, 10.7

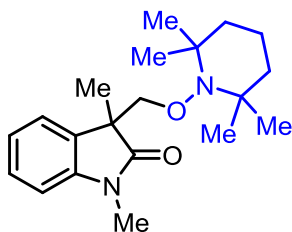

**10, 68%**

+

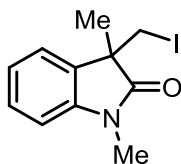

**3a, 10%**

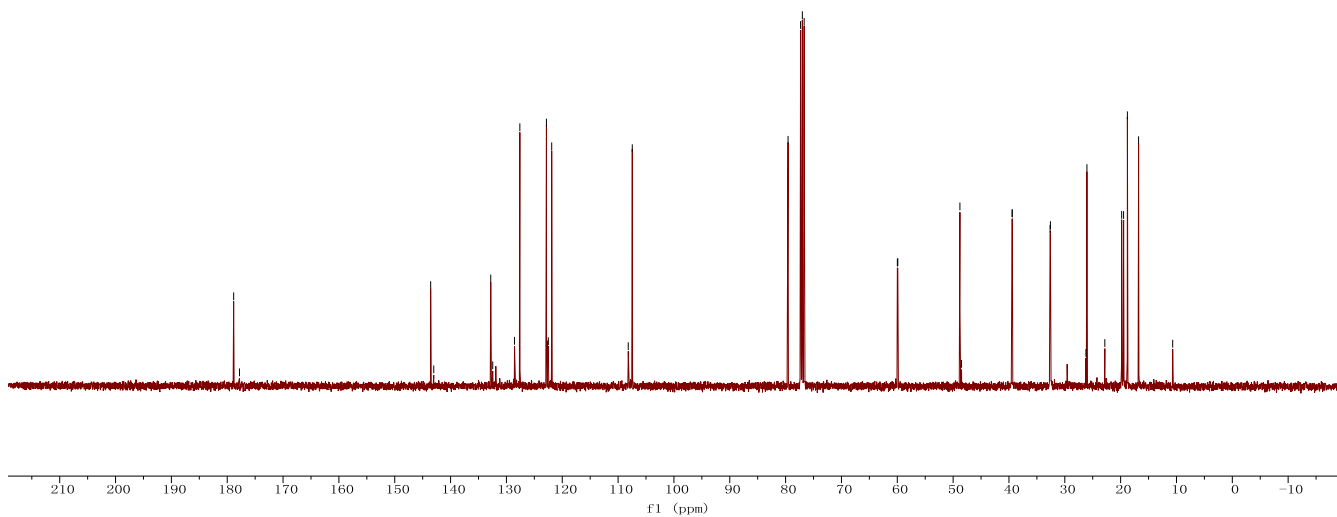

**3a', <sup>1</sup>H NMR (400 MHz, CDCl<sub>3</sub>)**

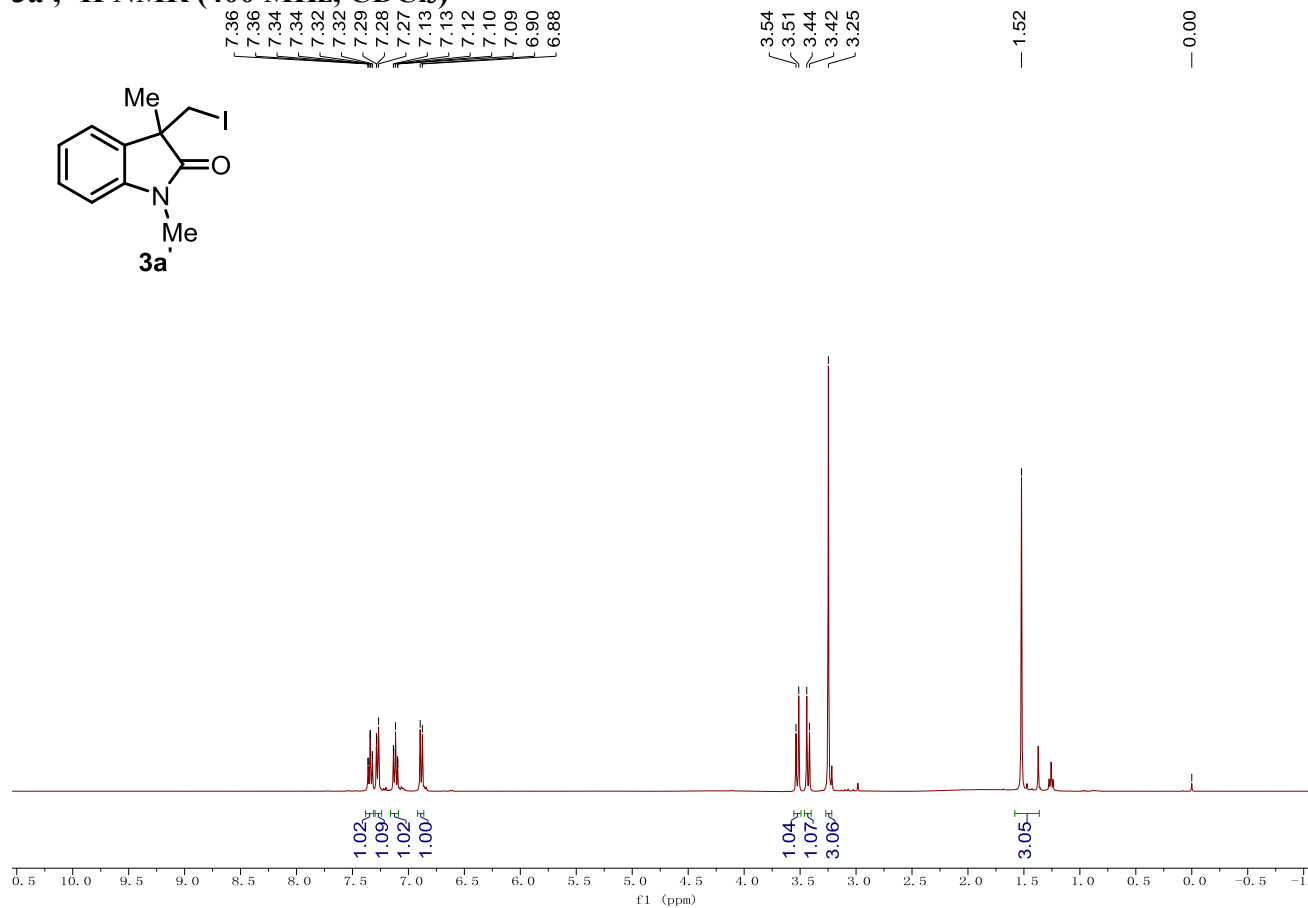

**3a', <sup>13</sup>C NMR (101 MHz, CDCl<sub>3</sub>)**

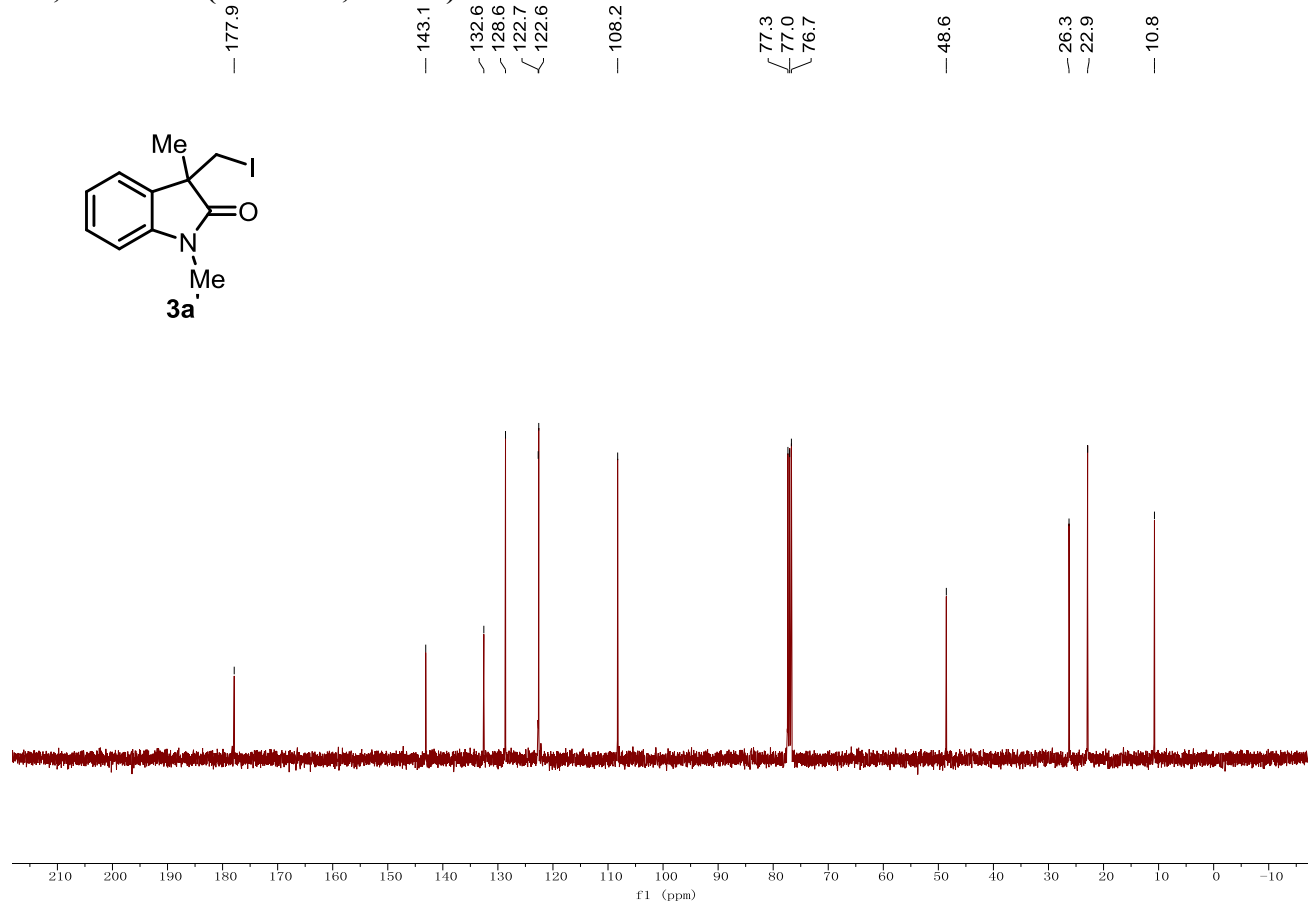

Supplement: d3cc03506a1.pdf [file d3cc03506a1.pdf]
